# Supplementary material
Source: PubMed Central journal article supplement (PMC10140651)

**Supplemental information**

**Robust SARS-CoV-2 T cell responses with common  
TCR $\alpha\beta$  motifs toward COVID-19 vaccines in patients  
with hematological malignancy impacting B cells**

**Thi H.O. Nguyen, Louise C. Rowntree, Lilith F. Allen, Brendon Y. Chua, Lukasz Kedzierski, Chhay Lim, Masa Lasica, G. Surekha Tennakoon, Natalie R. Saunders, Megan Crane, Lynette Chee, John F. Seymour, Mary Ann Anderson, Ashley Whitechurch, E. Bridie Clemens, Wuji Zhang, So Young Chang, Jennifer R. Habel, Xiaoxiao Jia, Hayley A. McQuilten, Anastasia A. Minervina, Mikhail V. Pogorelyy, Priyanka Chaurasia, Jan Petersen, Tejas Menon, Luca Hensen, Jessica A. Neil, Francesca L. Mordant, Hyon-Xhi Tan, Aira F. Cabug, Adam K. Wheatley, Stephen J. Kent, Kanta Subbarao, Theo Karapanagiotidis, Han Huang, Lynn K. Vo, Natalie L. Cain, Suellen Nicholson, Florian Krammer, Grace Gibney, Fiona James, Janine M. Trevillyan, Jason A. Trubiano, Jeni Mitchell, Britt Christensen, Katherine A. Bond, Deborah A. Williamson, Jamie Rossjohn, Jeremy Chase Crawford, Paul G. Thomas, Karin A. Thursky, Monica A. Slavin, Constantine S. Tam, Benjamin W. Teh, and Katherine Kedzierska**

## SUPPLEMENTAL INFORMATION

### **Robust T cell responses with common TCR $\alpha\beta$ motifs towards COVID-19 vaccines in haematological malignancy patients with impacted B cell immunity**

Thi H O Nguyen<sup>1\*</sup>, Louise C Rowntree<sup>1\*</sup>, Liliith F Allen<sup>1\*</sup>, Brendon Y Chua<sup>1,2</sup>, Lukasz Kedzierski<sup>1,3</sup>, Chhay Lim<sup>4</sup>, Masa Lasica<sup>5,6</sup>, G Surekha Tennakoon<sup>4</sup>, Natalie R Saunders<sup>4</sup>, Megan Crane<sup>4</sup>, Lynette Chee<sup>7,8</sup>, John F Seymour<sup>7,9</sup>, Mary Ann Anderson<sup>7,9,10</sup>, Ashley Whitechurch<sup>7</sup>, E Bridie Clemens<sup>1</sup>, Wuji Zhang<sup>1</sup>, So Young Chang<sup>1</sup>, Jennifer R Habel<sup>1</sup>, Xiaoxiao Jia<sup>1</sup>, Hayley A McQuilten<sup>1</sup>, Anastasia A Minervina<sup>11</sup>, Mikhail V Pogorelyy<sup>11</sup>, Priyanka Chaurasia<sup>12</sup>, Jan Petersen<sup>12</sup>, Tejas Menon<sup>1</sup>, Luca Hensen<sup>1</sup>, Jessica Neil<sup>1</sup>, Francesca L Mordant<sup>1</sup>, Hyon-Xhi Tan<sup>1</sup>, Aira F Cabug, Adam K Wheatley<sup>1</sup>, Stephen J Kent<sup>1,13,14</sup>, Kanta Subbarao<sup>15</sup>, Theo Karapanagiotidis<sup>16</sup>, Han Huang<sup>16</sup>, Lynn K Vo<sup>16</sup>, Natalie L Cain<sup>16</sup>, Suellen Nicholson<sup>16</sup>, Florian Krammer<sup>17</sup>, Grace Gibney<sup>18</sup>, Fiona James<sup>18</sup>, Janine M Trevillyan<sup>18</sup>, Jason A Trubiano<sup>4,8,19,20</sup>, Jeni Mitchell<sup>21</sup>, Britt Christensen<sup>8,21</sup>, Katherine A Bond<sup>1,16,22</sup>, Deborah A Williamson<sup>10,16,23</sup>, Jamie Rossjohn<sup>12,24</sup>, Jeremy Chase Crawford<sup>11</sup>, Paul G Thomas<sup>11</sup>, Karin A Thursky<sup>4,9,20</sup>, Monica A Slavin<sup>4,9,20,23#</sup>, Constantine S Tam<sup>7,8#</sup>, Benjamin W Teh<sup>4,9,20#</sup> and Katherine Kedzierska<sup>1,2#</sup>

**Table S1.** Cohort demographics and clinical summary, refer to Figure 1.

**Figure S1.** Haematology patients grouped by low, normal or high B cell numbers.

**Figure S2.** FACS gating strategies to measure cellular vaccine responses.

**Figure S3.** Correlations of whole blood subsets.

**Figure S4.** Functional spike-specific CD4<sup>+</sup> and CD8<sup>+</sup> T cell responses in haematology patients and healthy individuals.

**Figure S5.** Spike-specific CD4<sup>+</sup> and CD8<sup>+</sup> T cell responses by vaccine type.

**Figure S6.** Volcano plots comparing healthy individuals and haematology patients.

**Figure S7.** *Ex vivo* SARS-CoV-2-specific tetramer<sup>+</sup> T cell responses following COVID-19 vaccination.

**Figure S8.** Vaccine responses in donors with breakthrough SARS-CoV-2 infections.

**Figure S9.** *Ex vivo* paired spike and non-spike-specific tetramer<sup>+</sup> CD8<sup>+</sup> T cell responses following breakthrough COVID-19.

**Figure S10.** V and J gene segment usage and covariation in epitope-specific responses.

**Figure S11.** TCR logo representations of CDR3 $\alpha$  and  $\beta$  sequence motifs for DPB4/S<sub>167</sub>, A2/S<sub>269</sub> and A24/S<sub>1208</sub>.

**Figure S12.** Individual patient's immune response following COVID-19 vaccination.

## Supplementary Tables

**Table S1.** Cohort demographics and clinical summary, refer to Figure 1.

|                                                 | Healthy individuals | Haematology patients | BNT162b2, mRNA-1273 | ChAdOx1      |
|-------------------------------------------------|---------------------|----------------------|---------------------|--------------|
| Number of individuals, <i>n</i>                 | 58                  | 95                   | 25                  | 70           |
| Age, mean (range)                               | 44 (20-80)          | 65 (19-91)           | 51 (19-80)          | 70 (51-91)   |
| Female, <i>n</i> (%)                            | 41 (71%)            | 28 (29%)             | -                   | -            |
| Vaccine (2 doses), <i>n</i> (%)                 |                     |                      |                     |              |
| ChAdOx1 (AstraZeneca)                           | 26 (45%)            | 70 (74%)             | -                   | -            |
| Age, mean (range)                               | 51 (20-80)          | 70 (51-91)           | -                   | -            |
| BNT162b2 Comirnaty (Pfizer)                     | 32 (55%)            | 24 (25%)             | -                   | -            |
| Age, mean (range)                               | 38 (23-60)          | 50 (19-80)           | -                   | -            |
| mRNA-1273 (Moderna)                             | 0                   | 1 (1%)               | -                   | -            |
| Vaccine (3 <sup>rd</sup> dose), <i>n</i> (%)    |                     |                      |                     |              |
| ChAdOx1 (AstraZeneca)                           | 1 (2%)              | 5 (5%)               | -                   | -            |
| BNT162b2 Comirnaty (Pfizer)                     | 20 (34%)            | 63 (66%)             | -                   | -            |
| mRNA-1273 (Moderna)                             | 1 (2%)              | 10 (11%)             | -                   | -            |
| Novavax                                         | 1 (2%)              | 0 (0%)               | -                   | -            |
| Unknown due to lost follow-up                   | 35 (60%)            | 17 (18%)             | -                   | -            |
| Cellular therapy, <i>n</i> (%)                  |                     |                      |                     |              |
| Allogeneic SCT                                  | -                   | 33 (34%)             | 17 (68%)            | 16 (23%)     |
| Autograft                                       | -                   | 5 (5%)               | 4 (16%)             | 1 (1%)       |
| CAR T-cell                                      | -                   | 21(22%)              | 9 (36%)             | 12 (17%)     |
| CAR T-cell                                      | -                   | 7 (7%)               | 4 (16%)             | 3 (5%)       |
| Days post-cellular therapy, mean (range)        | -                   | 177 (45-393)         | 185 (45-393)        | 167 (73-337) |
| Malignancy/treatment, <i>n</i> (%)              |                     |                      |                     |              |
| CLL/naive                                       | -                   | 14 (15%)             | 2 (8%)              | 12 (17%)     |
| CLL/venetoclax                                  | -                   | 5 (5%)               | 1 (4%)              | 4 (6%)       |
| CLL/zanubrutinib                                | -                   | 25 (26%)             | 1 (4%)              | 24 (34%)     |
| WM/naive                                        | -                   | 1 (1%)               | 0                   | 1 (1%)       |
| WM/zanubrutinib                                 | -                   | 10 (11%)             | 1 (4%)              | 9 (13%)      |
| Myeloma                                         | -                   | 7 (7%)               | 3 (12%)             | 4 (6%)       |
| Previous SARS-CoV-2 infection, <i>n</i>         | 1                   | 0                    | 0                   | 0            |
| SARS-CoV-2 infection during the study, <i>n</i> | 8                   | 12                   | 5                   | 7            |

Abbreviations: CAR T-cell, chimeric antigen receptor T-cell; CLL, chronic lymphocytic leukemia; SCT, stem cell transplantation; WM, Waldenstrom macroglobulinemia. Clinical information and limited immune data have been described for a subset of CLL patients.<sup>41</sup>

## SUPPLEMENTARY FIGURES

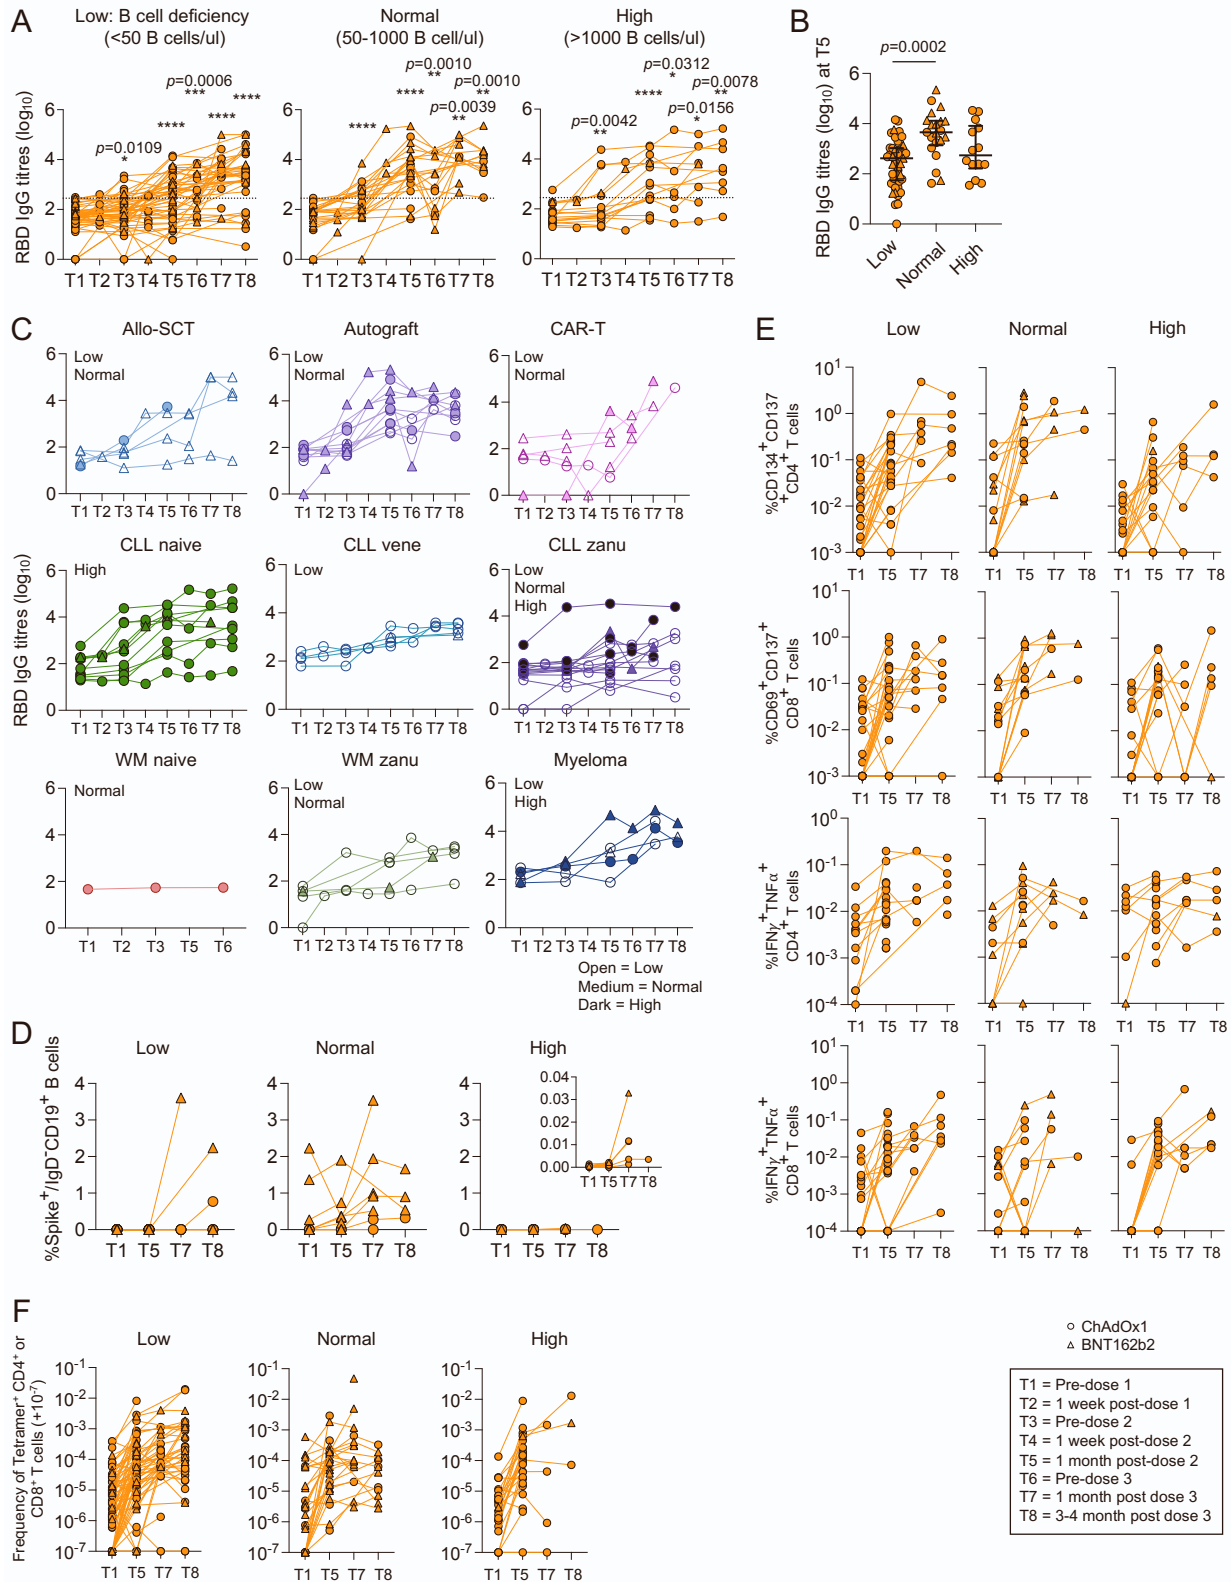

**Figure S1.** Haematology patients grouped by low, normal or high B cell numbers. End-point IgG titres of ancestral RBD antibodies (A) across sampling timepoints, (B) at T5, and (C) per malignancy and treatment group. (D) Spike-specific memory B cells in haematology patients grouped by low, normal or high B cell numbers. (E) AIM and ICS frequencies and (F) tetramer<sup>+</sup> spike-specific CD4<sup>+</sup> and CD8<sup>+</sup> T cells grouped by low, normal or high B cell numbers. Due to limited sample availability, experiments were performed once for each sample. Related to Figure 1, 3, 4.



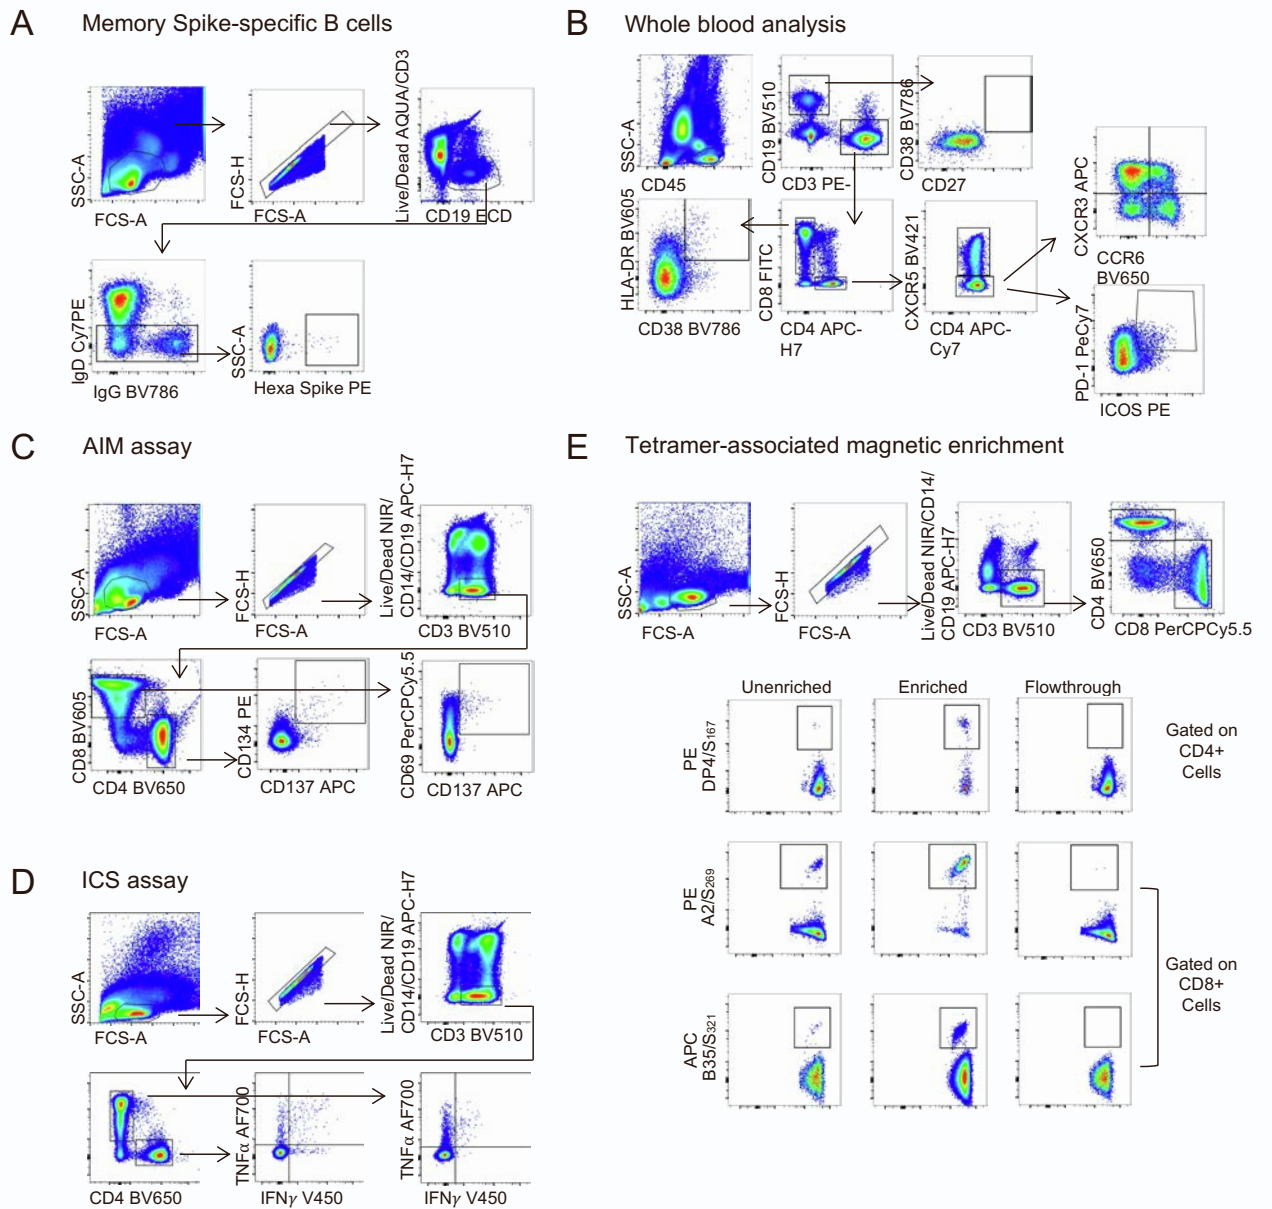

**Figure S2.** FACS gating strategies to measure cellular vaccine responses. Gating strategy for (A) memory spike-specific B cells, (B) whole blood analysis, (C) AIM and (D) ICS assay, and (E) TAME. Related to Figure 1, 2, 3 and 4.

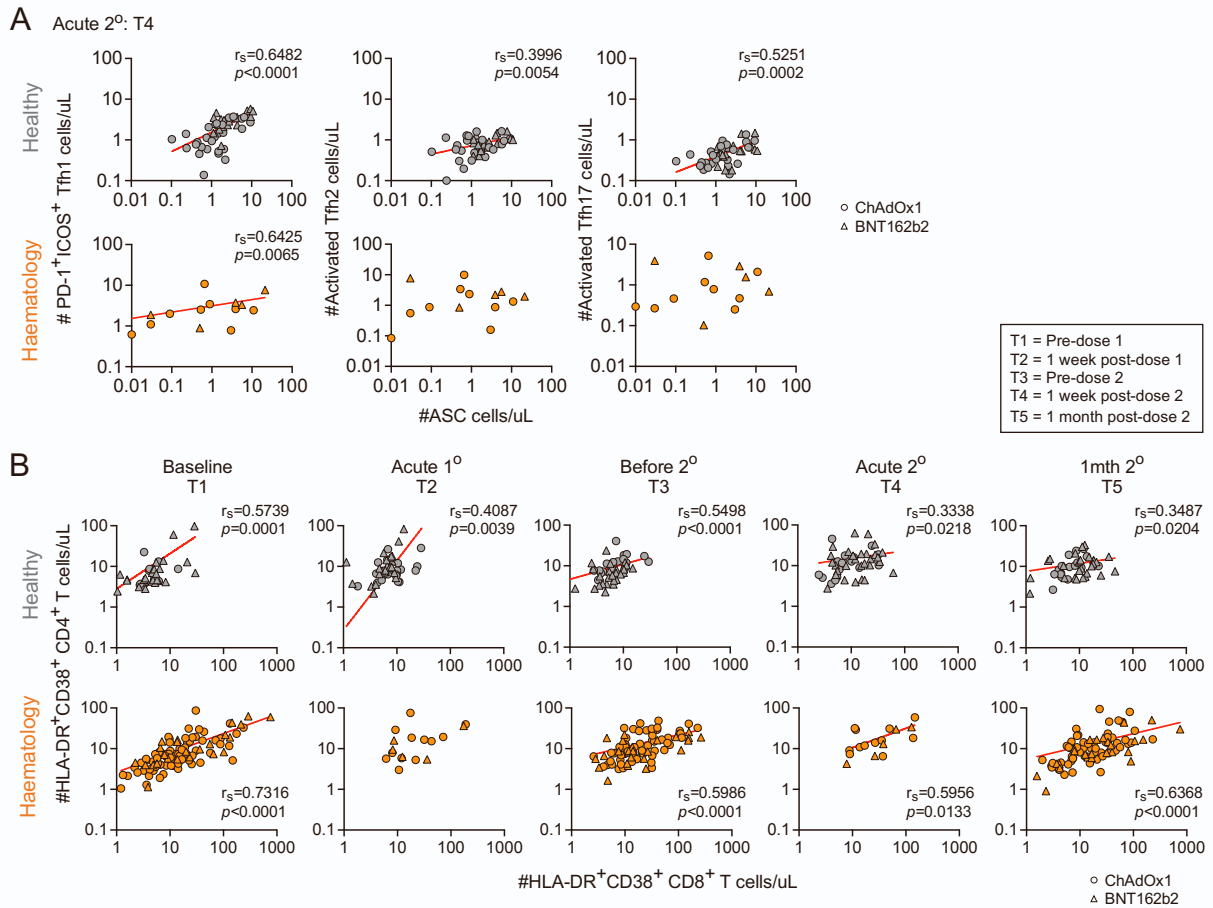

**Figure S3.** Correlations of whole blood subsets. (A) Spearman's correlation ( $r_s$ ) of ASCs and Tfh1, Tfh2 and Tfh17 subsets at T4. (B) Spearman's correlation ( $r_s$ ) of activated CD4<sup>+</sup> and CD8<sup>+</sup> T cells at T1-T5. Due to limited sample availability, experiments were performed once for each sample. Related to Figure 2.

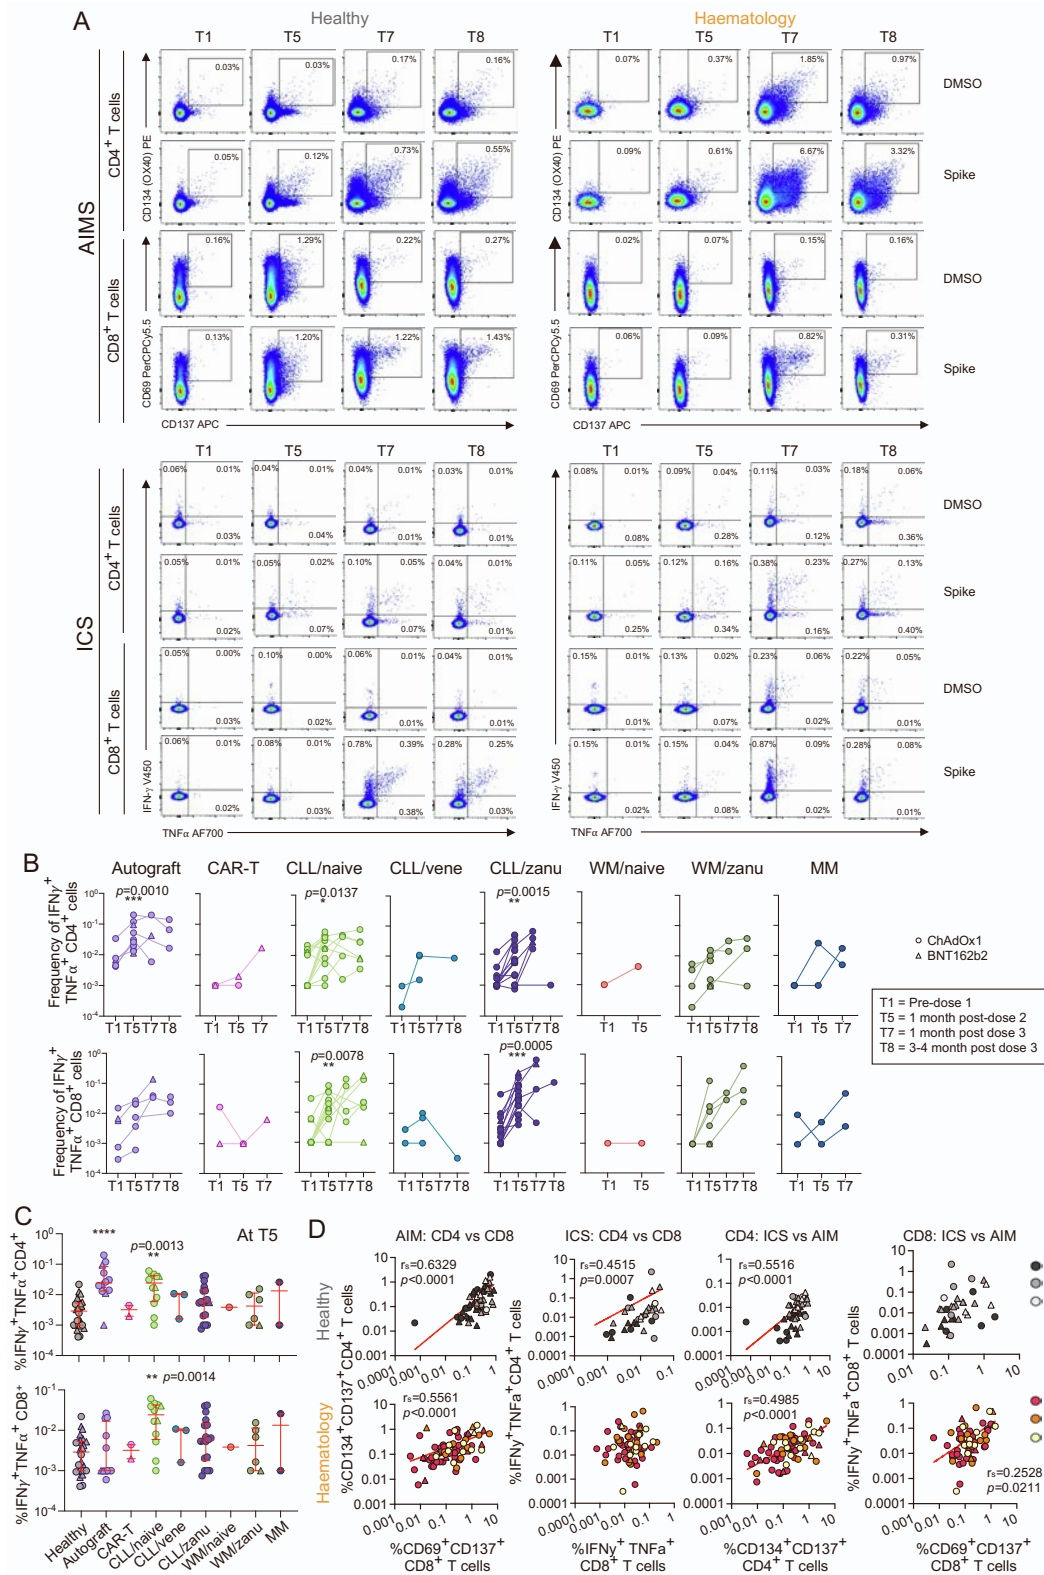

**Figure S4.** Functional spike-specific CD4<sup>+</sup> and CD8<sup>+</sup> T cell responses in haematology patients and healthy individuals. (A) Representative AIM and ICS FACS plots including DMSO controls. (B) ICS frequency per malignancy and treatment group at all timepoints measured and (C) at T5 where median and IQR are shown. Statistical significance determined by Dunn's multiple comparisons set on healthy versus all other disease groups. (D) Spearman correlations of CD4<sup>+</sup> and CD8<sup>+</sup> T cell responses via AIM and ICS assays. Statistical significance determined by Wilcoxon test for timepoint comparisons against T1 (floating values). Exact  $p$  values  $0.0001 < p < 0.05$  are shown except  $p < 0.0001 = ****$ . Due to limited sample availability, experiments were performed once for each sample. Related to Figure 3.

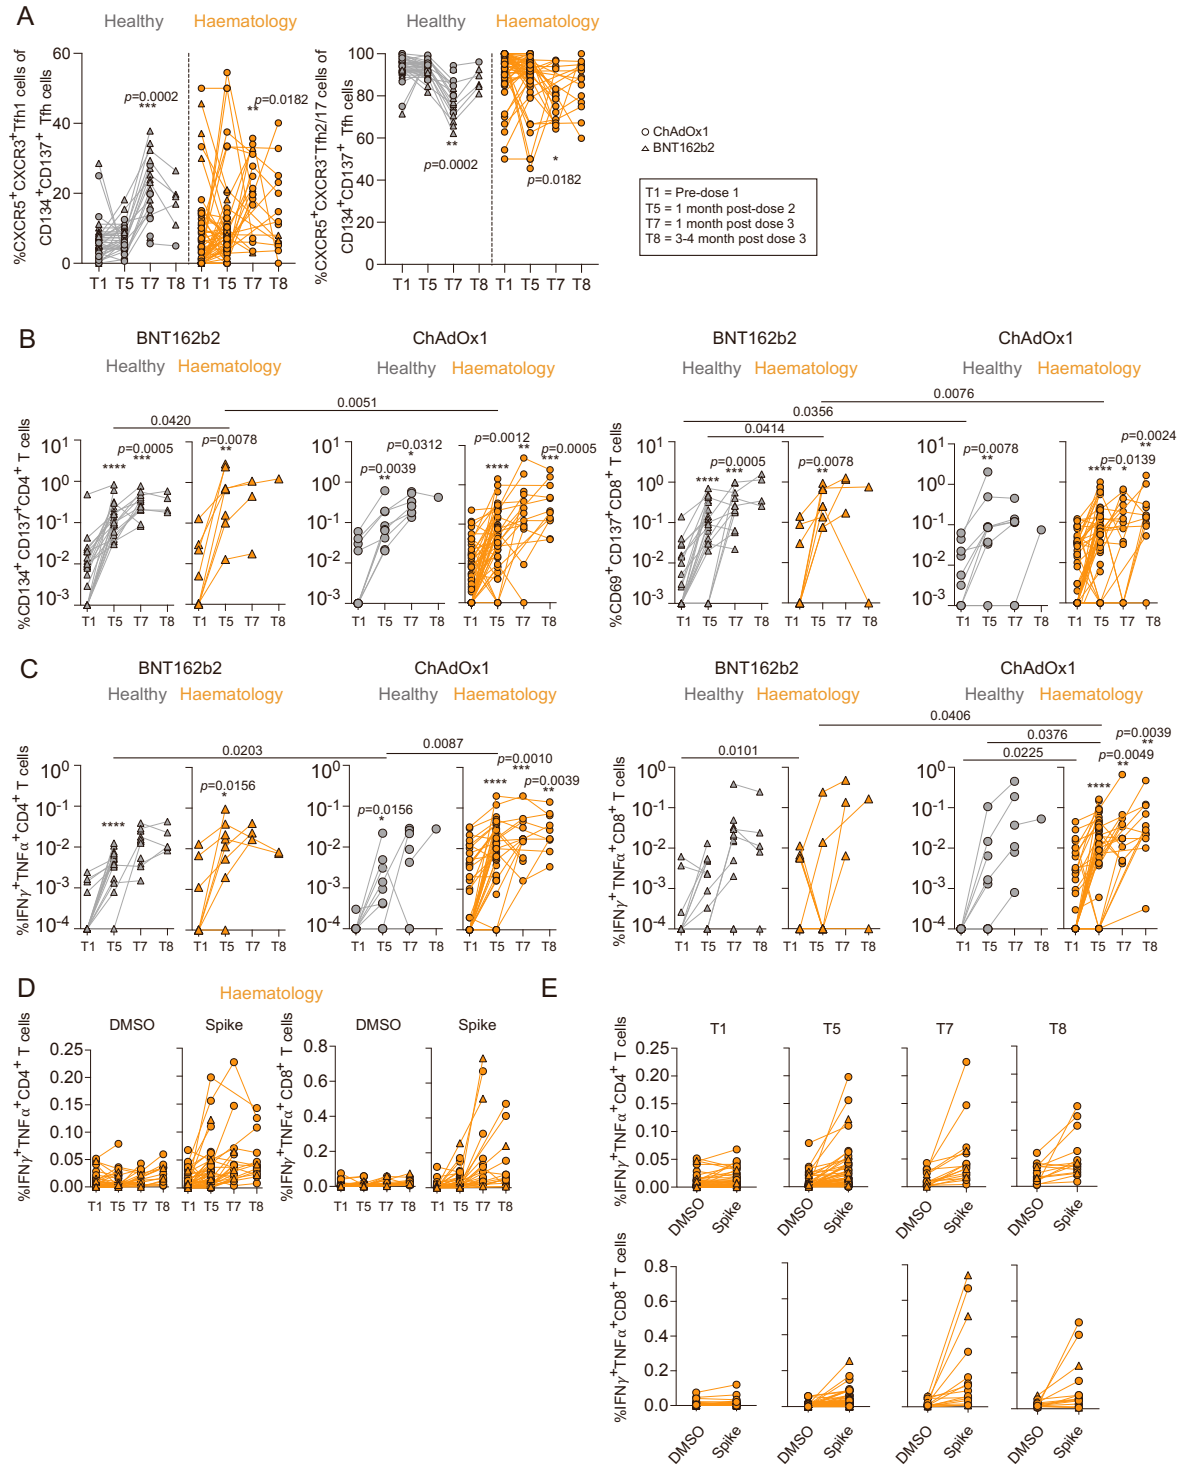

**Figure S5.** Spike-specific CD4<sup>+</sup> and CD8<sup>+</sup> T cell responses by vaccine type. (A) Frequency of Tfh1 and Tfh2/17 AIM<sup>+</sup> responses of total AIM<sup>+</sup> CXCR5<sup>+</sup>CD4<sup>+</sup> Tfh cell response. (B) AIM and (C) ICS frequencies of CD4<sup>+</sup> and CD8<sup>+</sup> T cells in healthy and haematology per vaccine type. (D, E) Raw percentages of IFN<sub>γ</sub><sup>+</sup>TNF<sub>α</sub><sup>+</sup> in DMSO and spike ICS cultures. Statistical significance determined by Wilcoxon test for timepoint comparisons against T1 (floating values) or by Mann-Whitney for comparisons between healthy and patient timepoints or between vaccine type (connecting line). Exact  $p$  values  $0.0001 < p < 0.05$  are shown except  $p < 0.0001 = ****$ . Due to limited sample availability, experiments were performed once for each sample. Related to Figure 3.

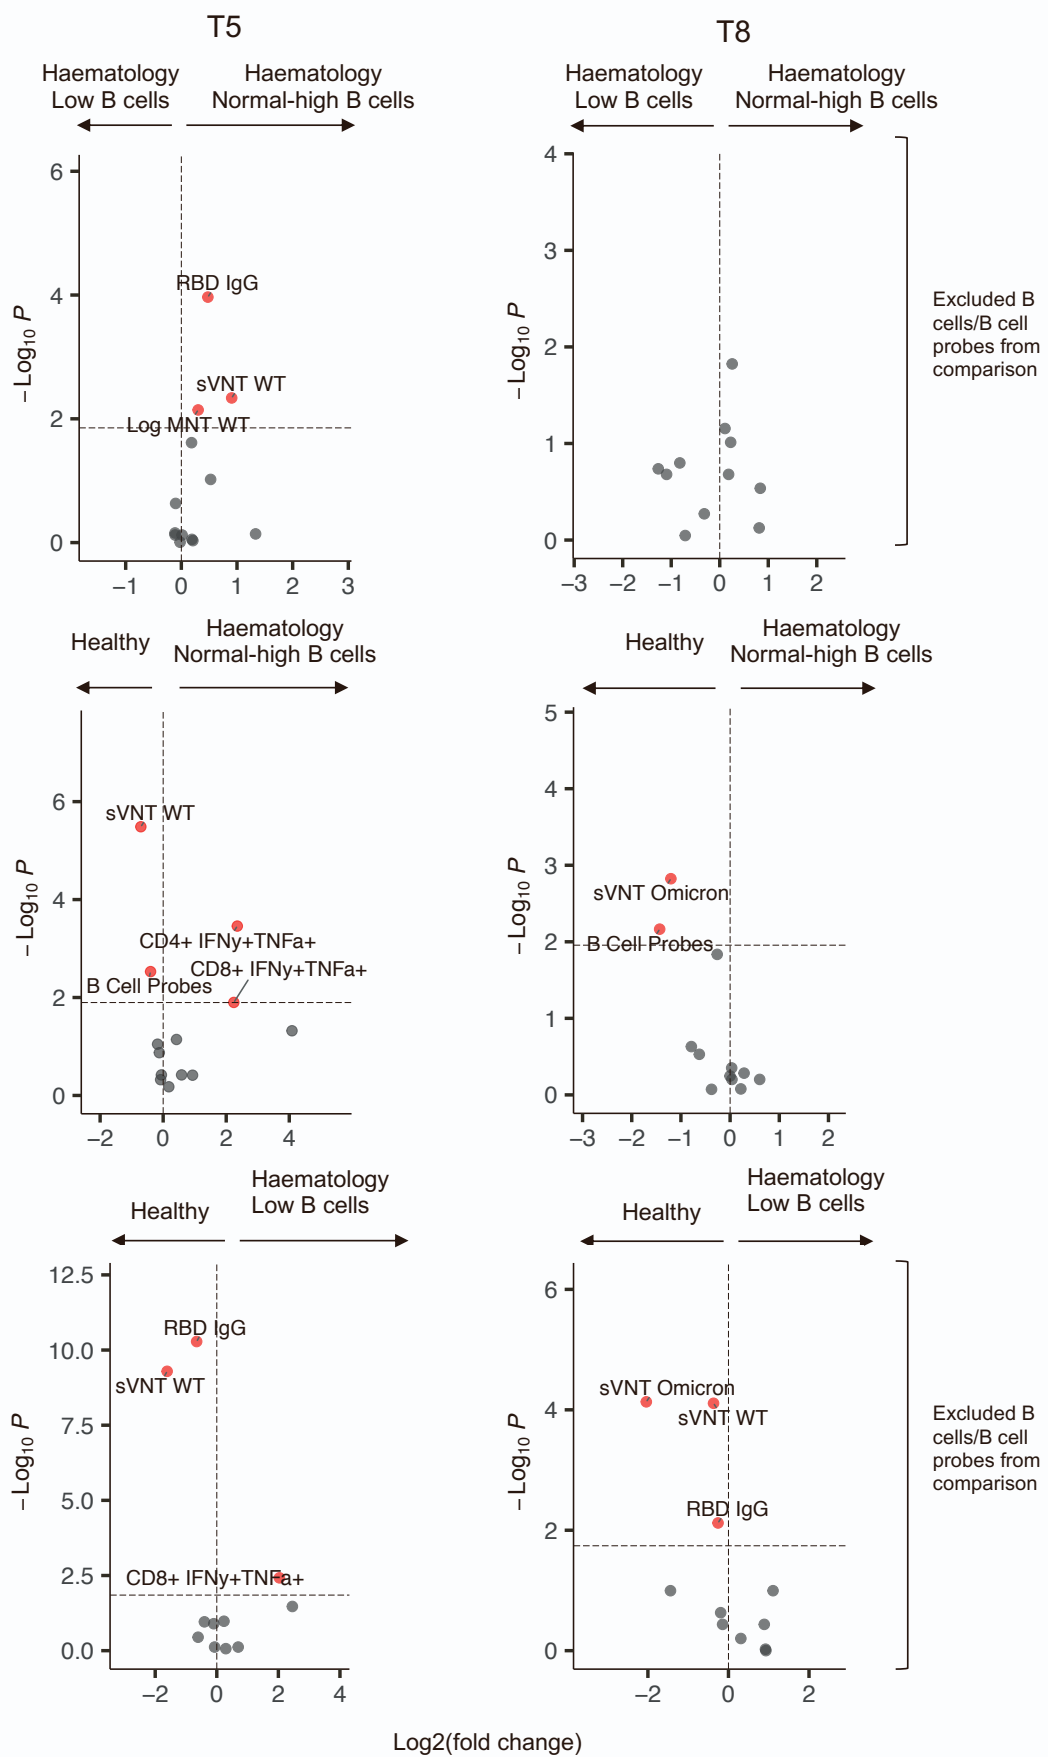

**Figure S6.** Volcano plots comparing healthy individuals and haematology patients. Related to Figure 3.

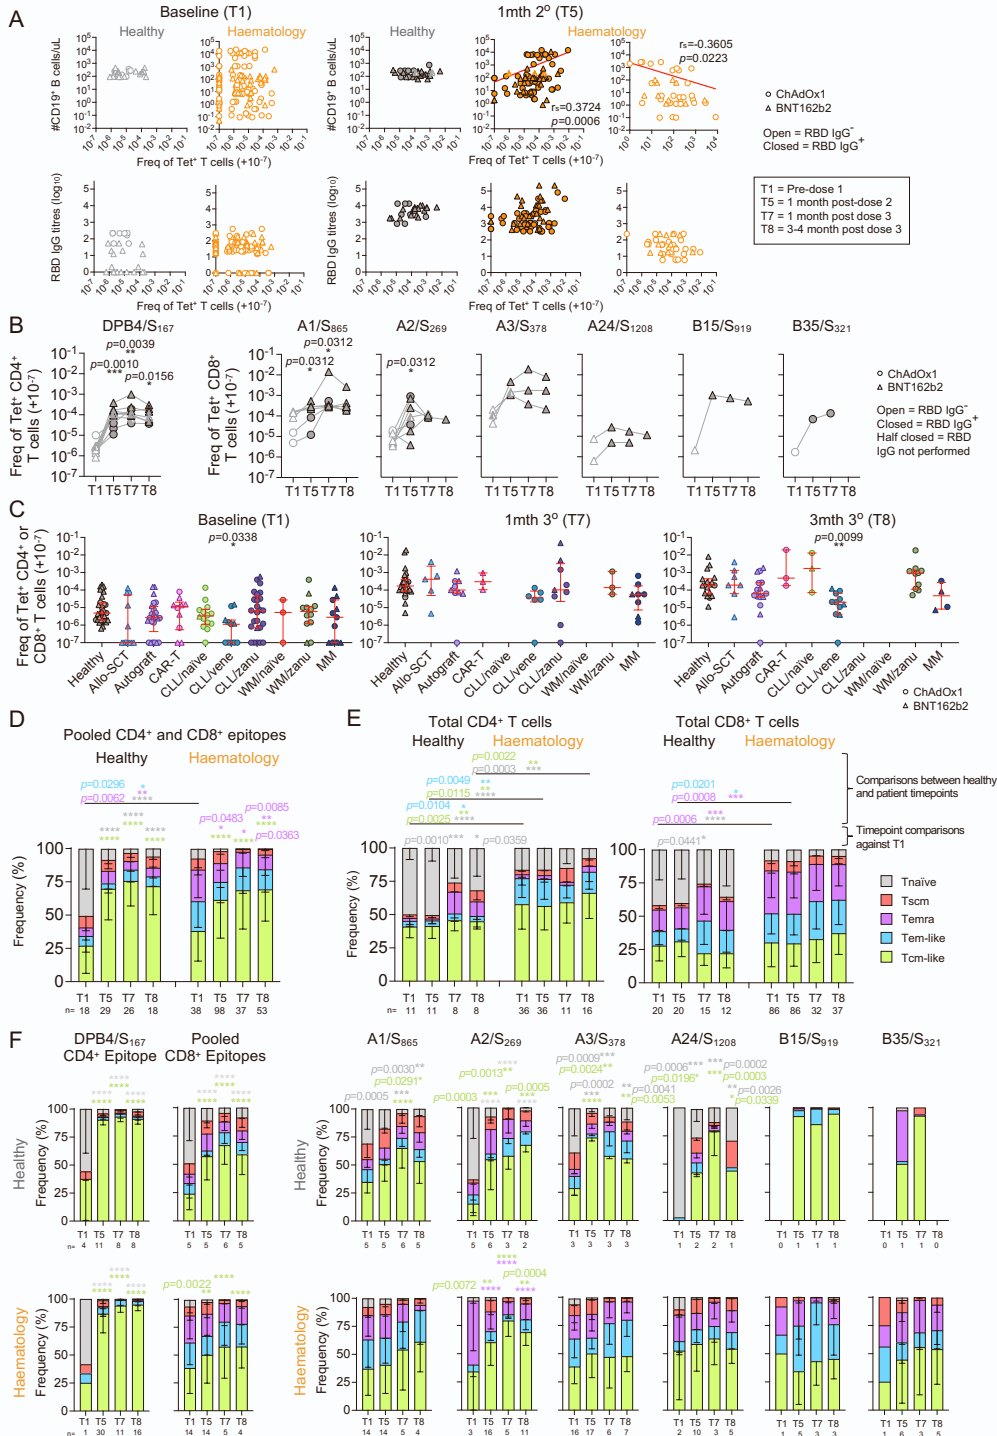

**Figure S7.** *Ex vivo* SARS-CoV-2-specific tetramer<sup>+</sup> T cell responses following COVID-19 vaccination. (A) Spearman's correlation ( $r_s$ ) of tetramer frequencies versus B cell numbers and RBD IgG titres at T1 and T5. (B) Tetramer CD4<sup>+</sup> and CD8<sup>+</sup> T cell frequencies of healthy individuals per SARS-CoV-2 epitope. (C) Tetramer frequencies at T1, T7 and T8 where median and IQR are shown. (D) Phenotype profiles of pooled tetramer<sup>+</sup> cells, (E) total CD4<sup>+</sup> T cells and CD8<sup>+</sup> T cells and (F) per SARS-CoV-2 epitope. The frequency of tetramer<sup>+</sup> cells have been right-shifted by  $10^{-7}$  (i.e. no detected tetramer<sup>+</sup> events displayed as  $10^{-7}$ ) to allow for visibility on the logarithmic y axis. Only samples with 10 or more tetramer<sup>+</sup> events are included in the phenotypic analysis (Figure D, E and F). Statistical significance determined by Wilcoxon test for timepoint comparisons against T1 ((B) floating values), Dunn's multiple comparisons set on healthy versus all other disease groups (c), Tukey's multiple comparison test (floating values are timepoint comparisons against T1; connecting line are comparisons between healthy and patient timepoints) (D,E), and Dunnett's multiple comparison test for timepoint comparisons against T1 (F). Exact  $p$  values  $0.0001 < 0.05$  are shown except  $p < 0.0001 = ****$ . Due to limited sample availability, experiments were performed once for each sample. Related to Figure 4.



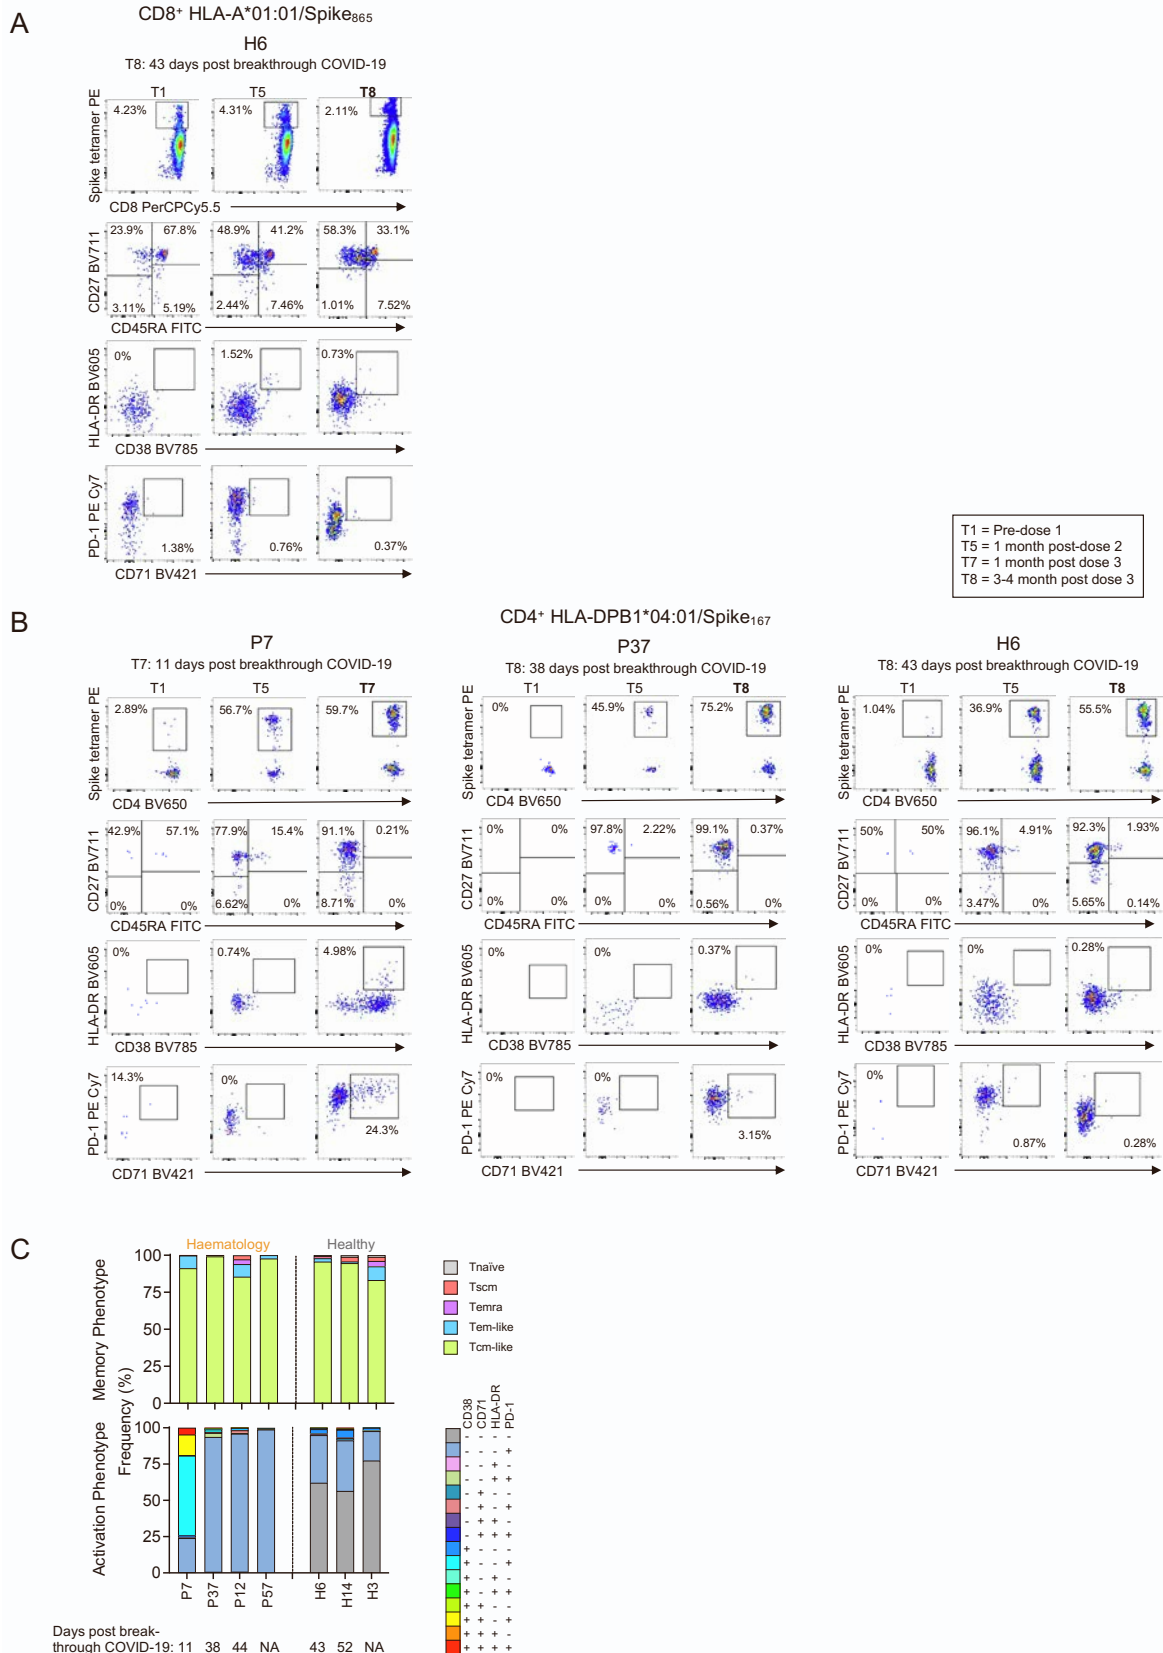

**Figure S8.** Vaccine responses in donors with breakthrough SARS-CoV-2 infections. Representative TAME enriched FACS plots gated on CD8<sup>+</sup> (A) and CD4<sup>+</sup> (B) T cells depicting tetramer, and memory and activation phenotypes. (C) Memory and activation phenotypes of DPB4/S<sub>167</sub>-specific CD4<sup>+</sup> T cells from individuals with breakthrough COVID-19. Due to limited sample availability, experiments were performed once for each sample. Related to Figure 5.

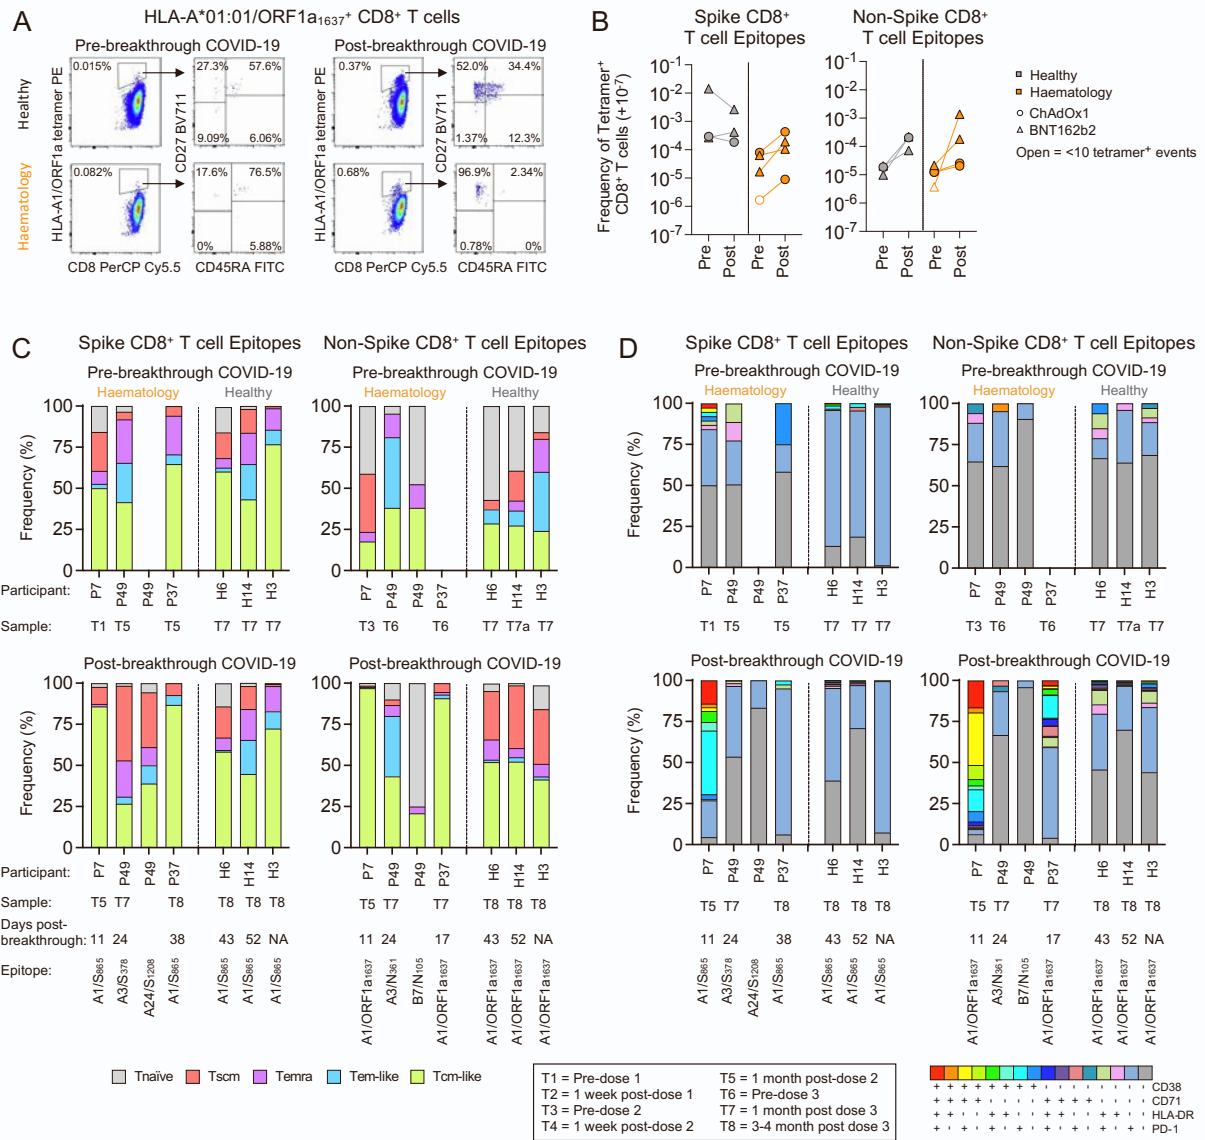

**Figure S9.** *Ex vivo* paired spike and non-spike-specific tetramer<sup>+</sup> CD8<sup>+</sup> T cell responses following breakthrough COVID-19. (A) Representative FACS plots of TAME-enriched non-spike-specific CD8<sup>+</sup> tetramer populations. (B) Paired tetramer CD8<sup>+</sup> T cell frequencies of healthy and haematology participants pre- and post-COVID-19 breakthrough. Any samples with  $< 10$  tetramer<sup>+</sup> events are shown as open symbols. (C) Memory and (D) activation phenotype profiles for spike and non-spike-specific CD8<sup>+</sup> T cells for individuals with breakthrough COVID-19. The frequency of tetramer<sup>+</sup> cells have been right-shifted by  $10^{-7}$  (i.e. no detected tetramer<sup>+</sup> events displayed as  $10^{-7}$ ) to allow for visibility on the logarithmic y axis. Only samples with 10 or more tetramer<sup>+</sup> events are included in the phenotypic analysis (Figure C and D). Due to limited sample availability, experiments were performed once for each sample. Related to Figure 5.



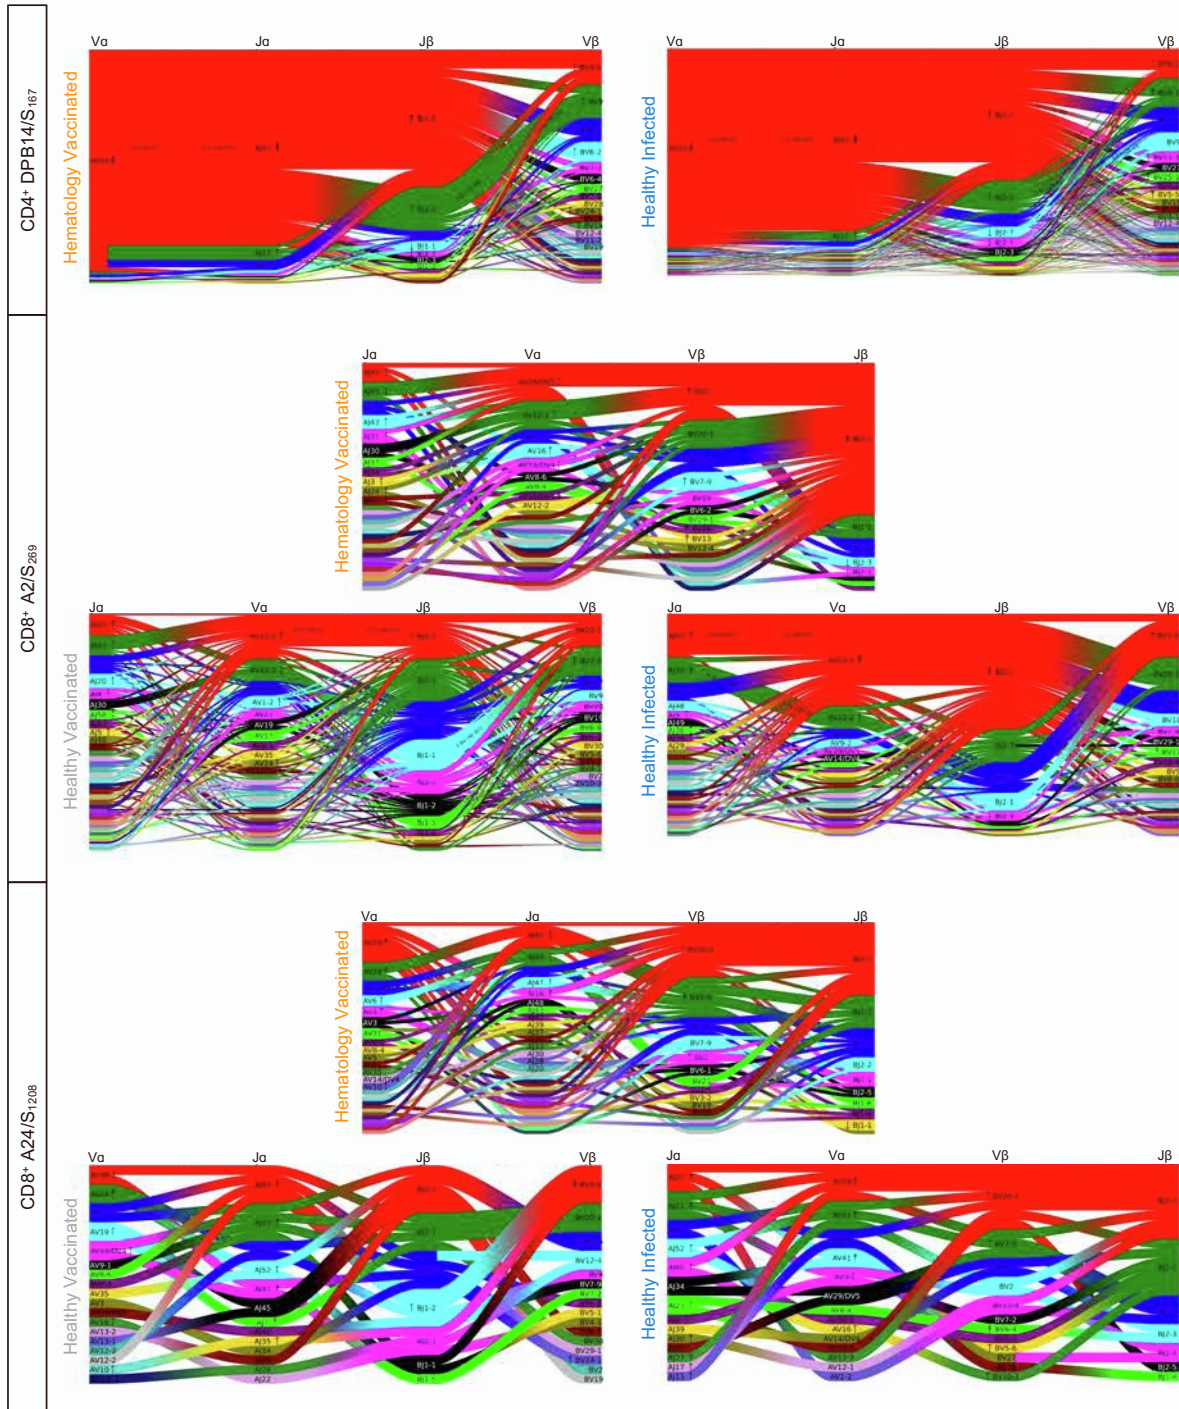

**Figure S10.** V and J gene segment usage and covariation in epitope-specific responses. Gene-gene pairing landscapes are depicted by curves between vertical gene segment stacks (thickness proportional to the number of TCRs with the gene pairing). Vertical arrows indicate the enrichment of gene segments relative to background frequencies, each arrowhead indicates a 2-fold enrichment. The clonally expanded TCRs were reduced to a single data point for this analysis. Genes are coloured based on frequency: red (most frequent), green (second most frequent), blue, cyan, magenta, and black, followed by assorted colours for rare frequencies. Related to Figure 6.

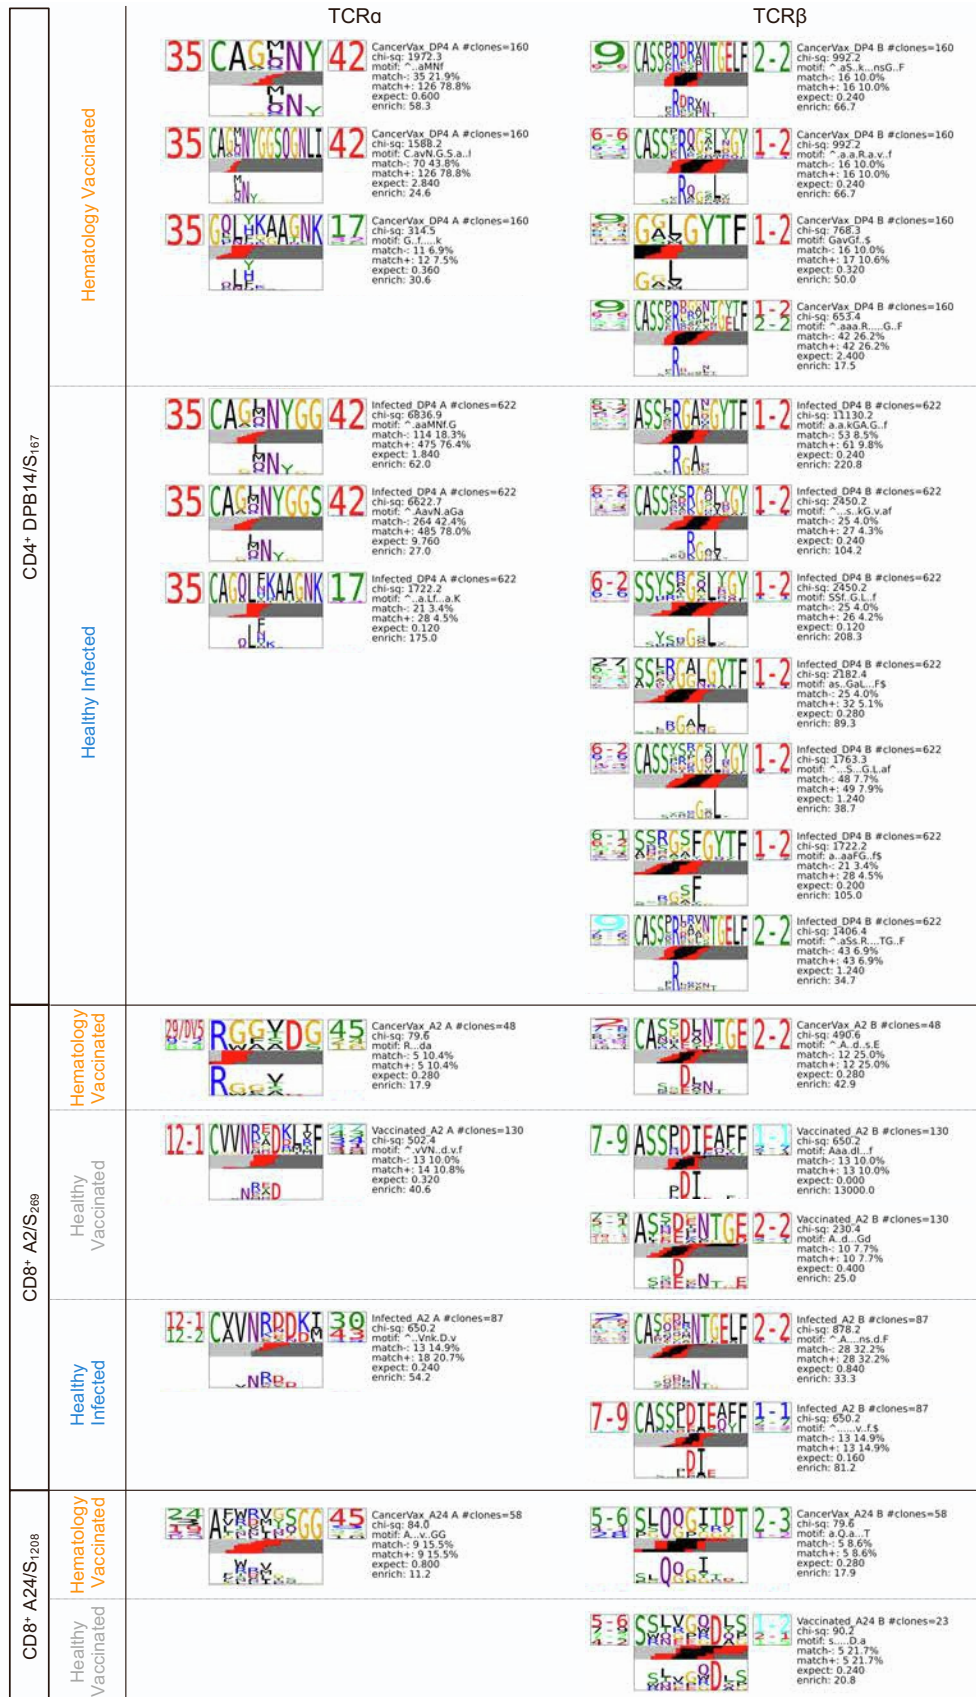

**Figure S11.** TCR logo representations of CDR3α and β sequence motifs for DPB4/S<sub>167</sub>, A2/S<sub>269</sub> and A24/S<sub>1208</sub>. Each TCR motif depicts the V (left side) and J (right side) gene frequencies, the CDR3 amino acid sequence (middle), and the inferred rearrangement structure (bottom bars coloured by source region; V-region, light grey; insertions, red; diversity (D)-region, black; and J-region dark grey). The motif scores with chi-squared values greater than 90 were considered highly significant. Related to Figure 6.

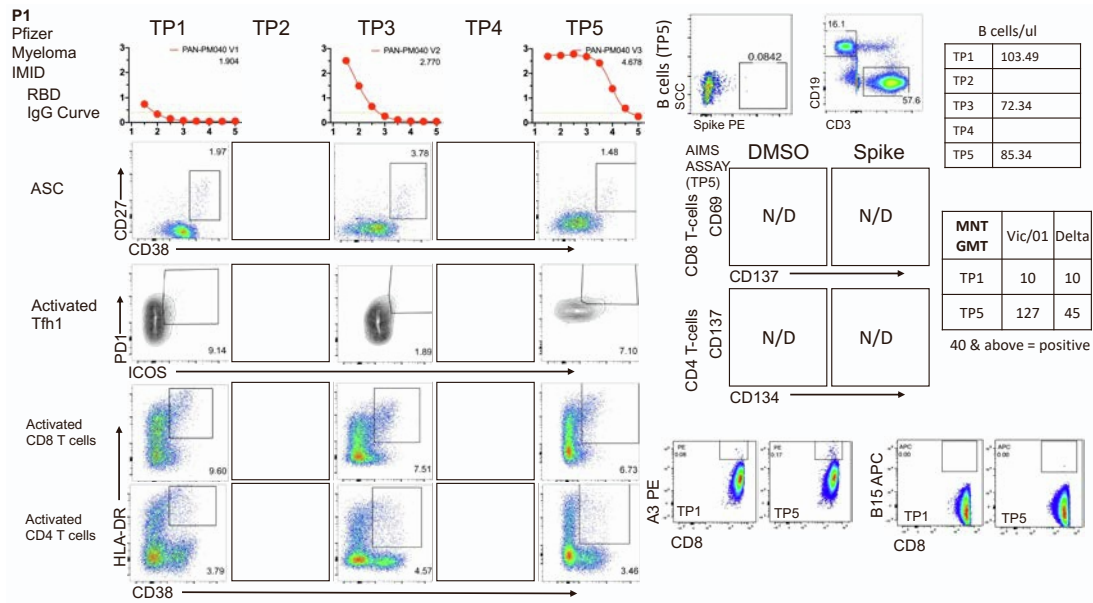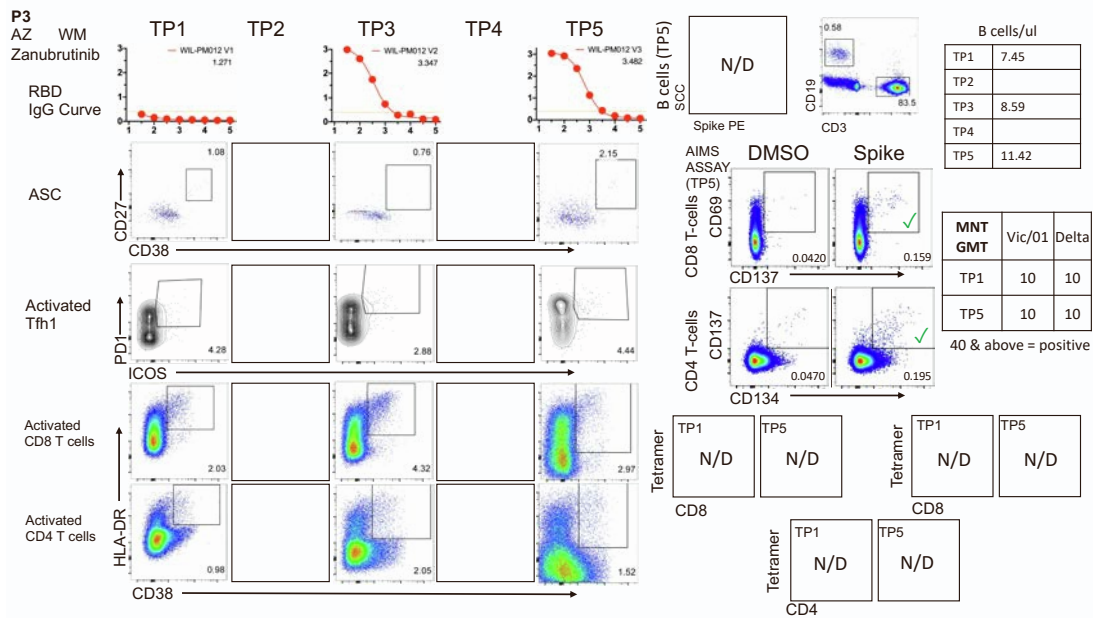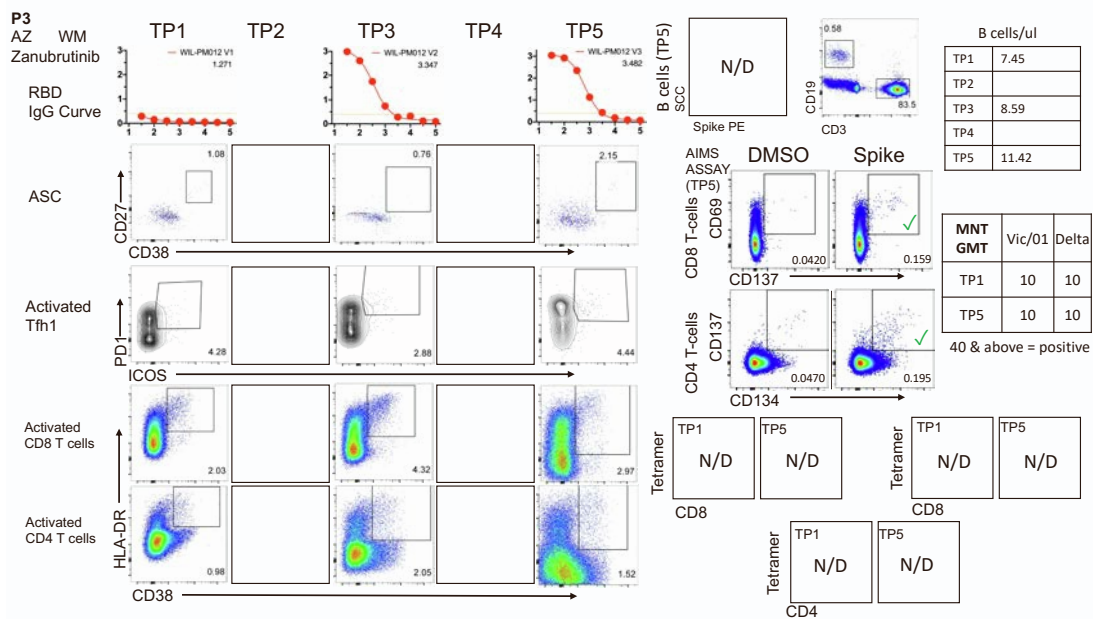



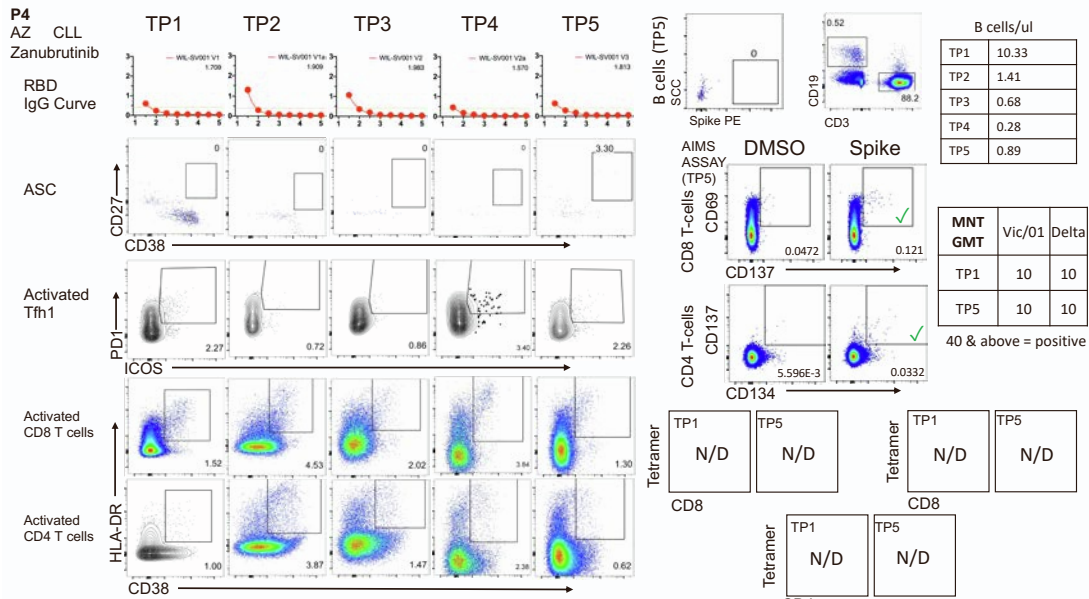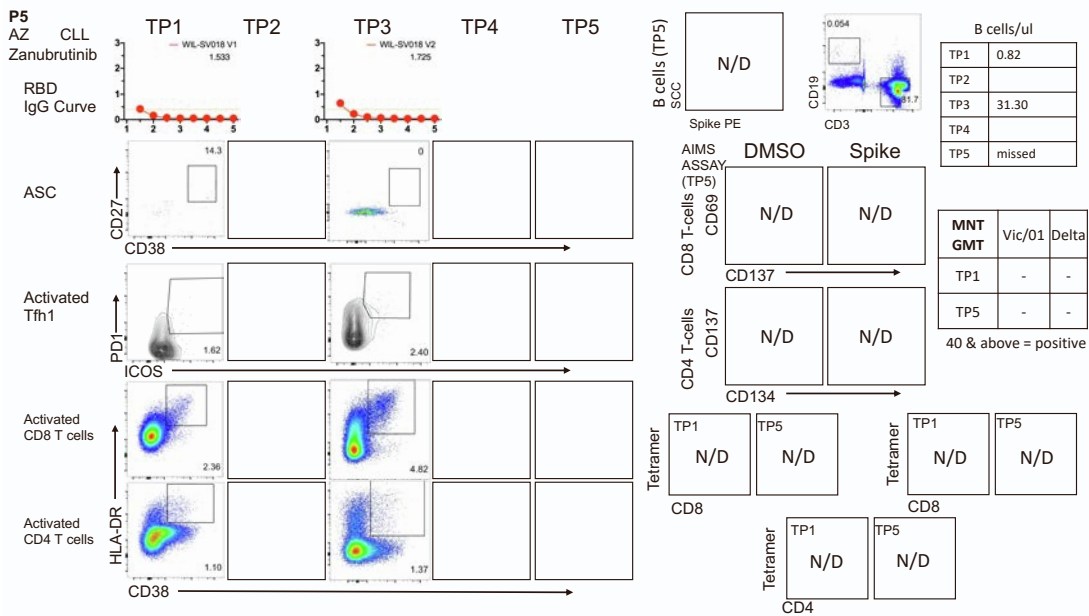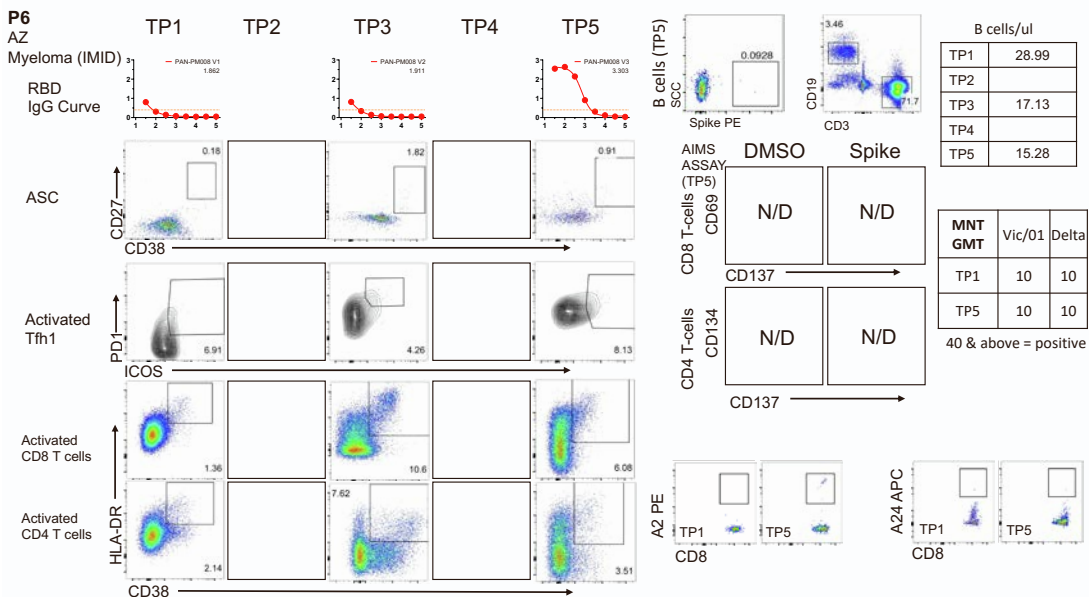

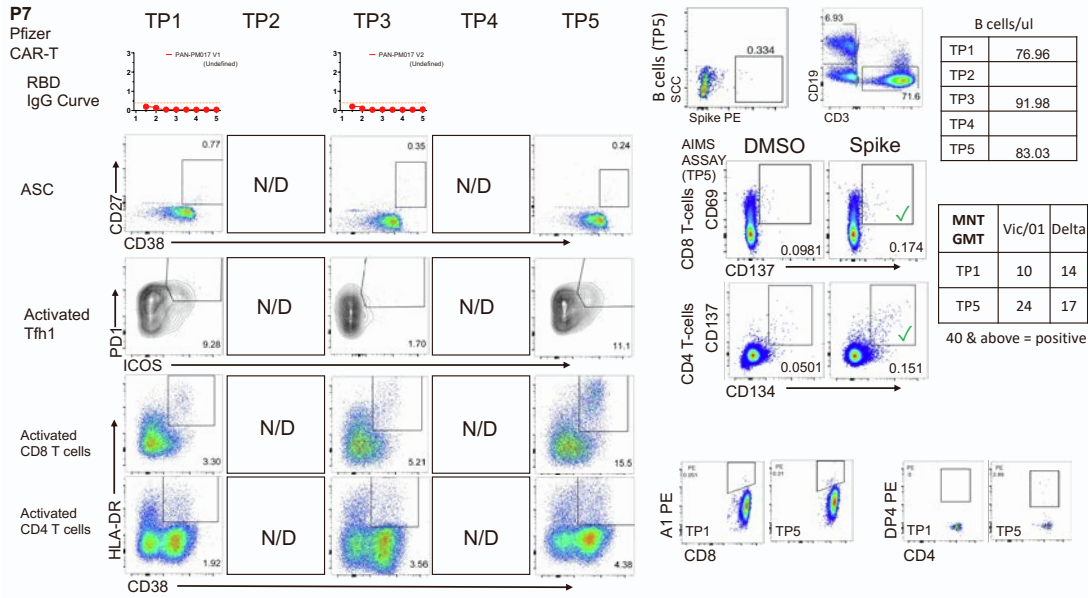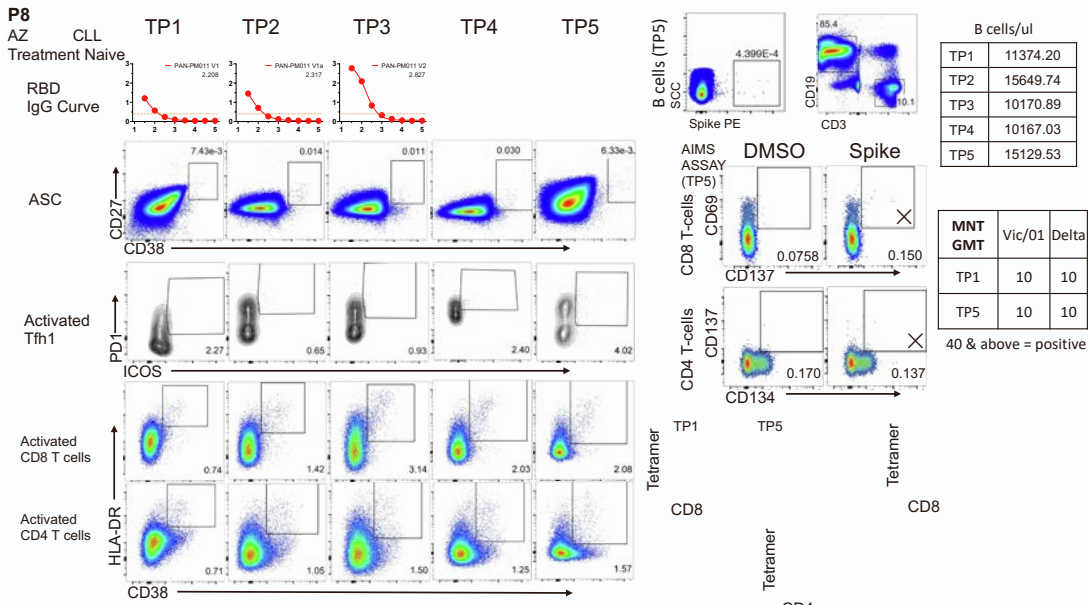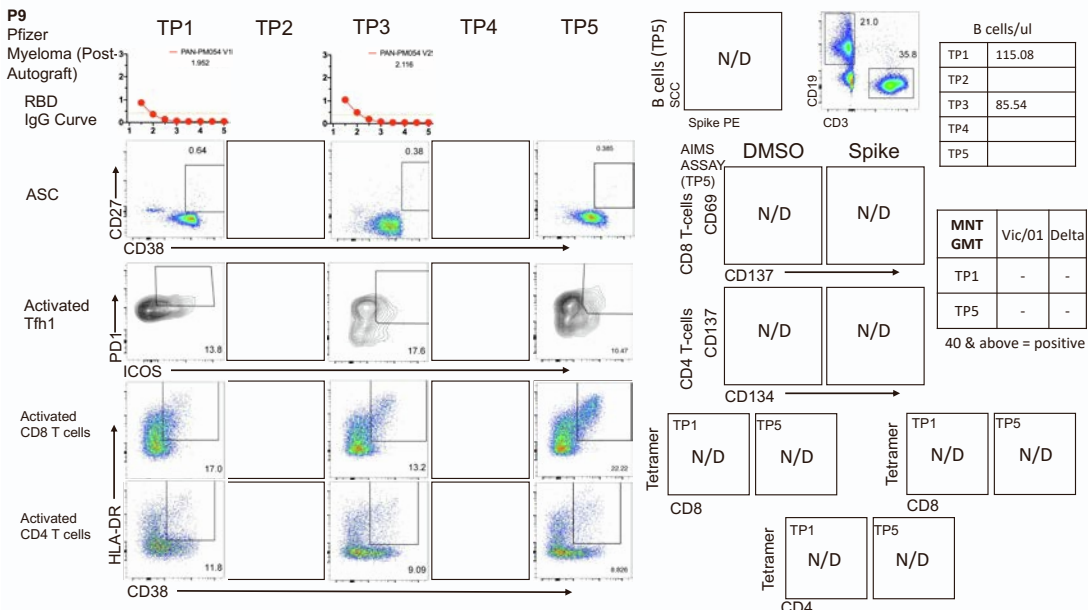

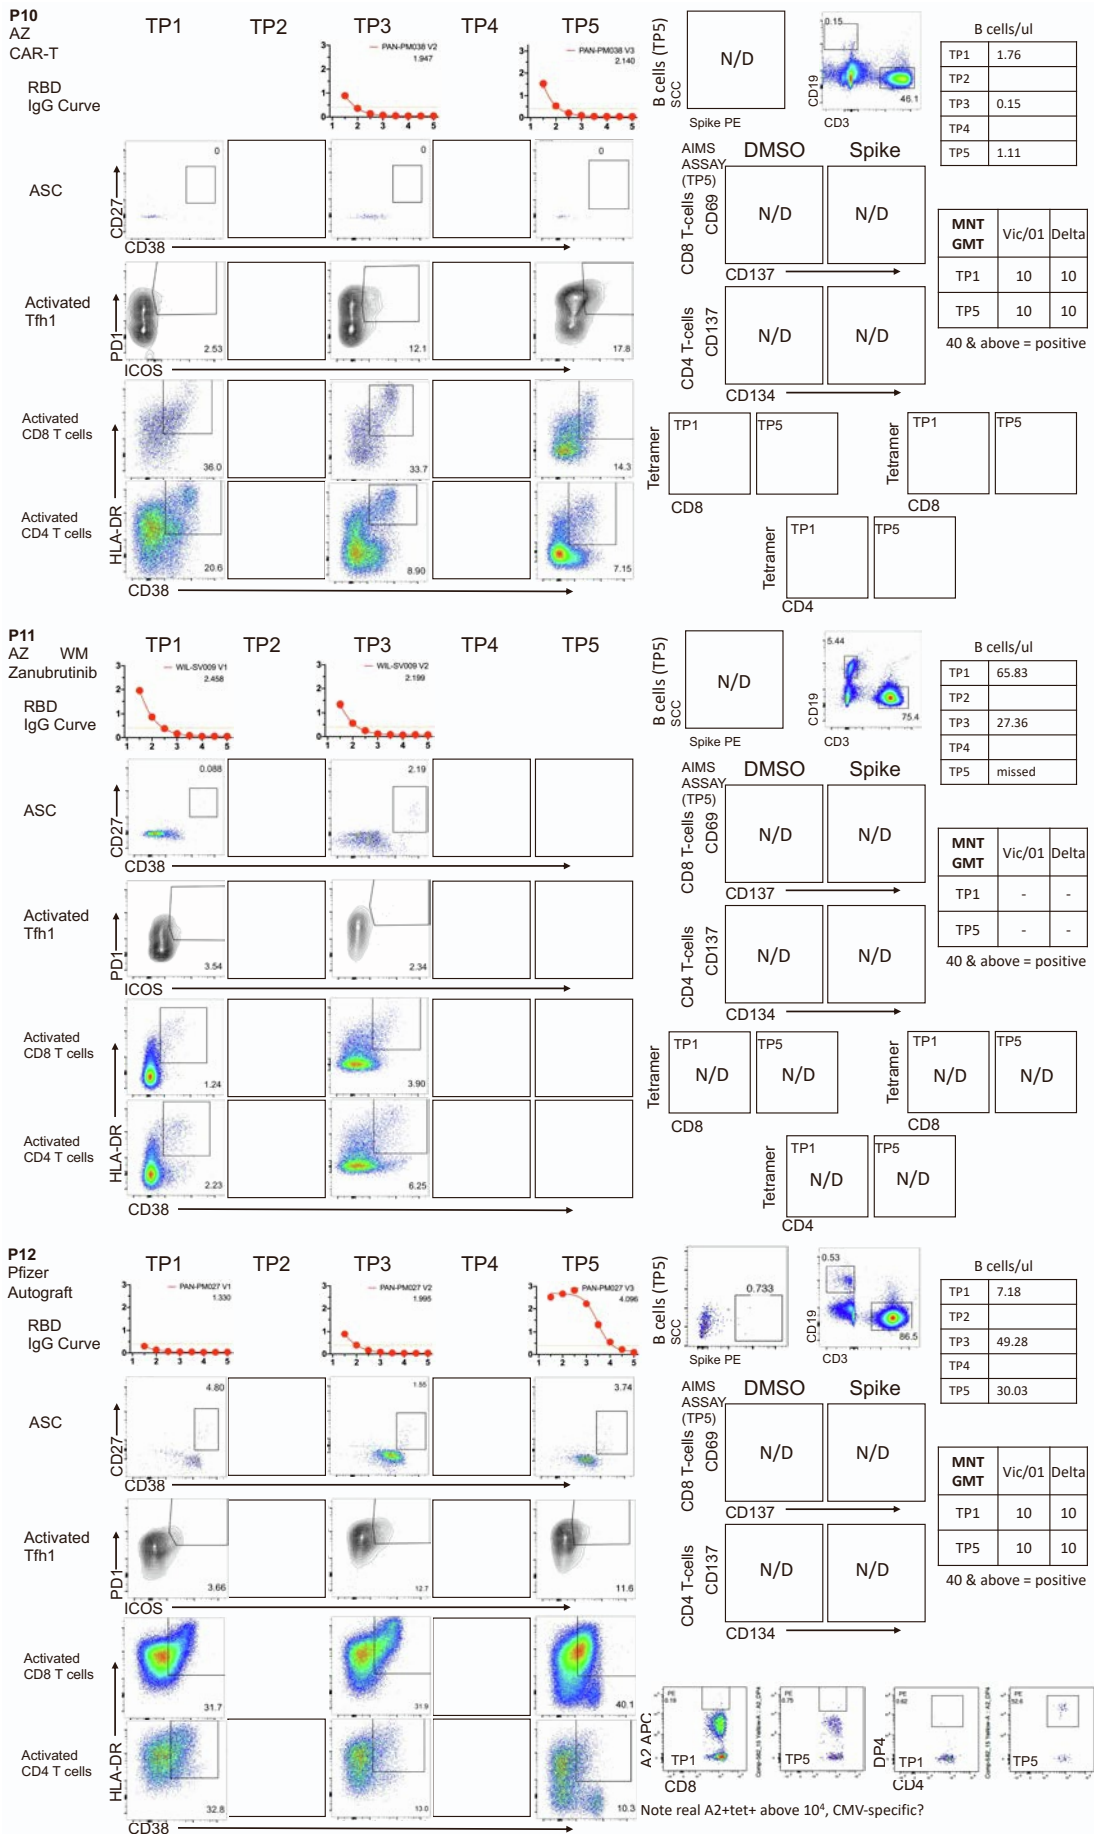

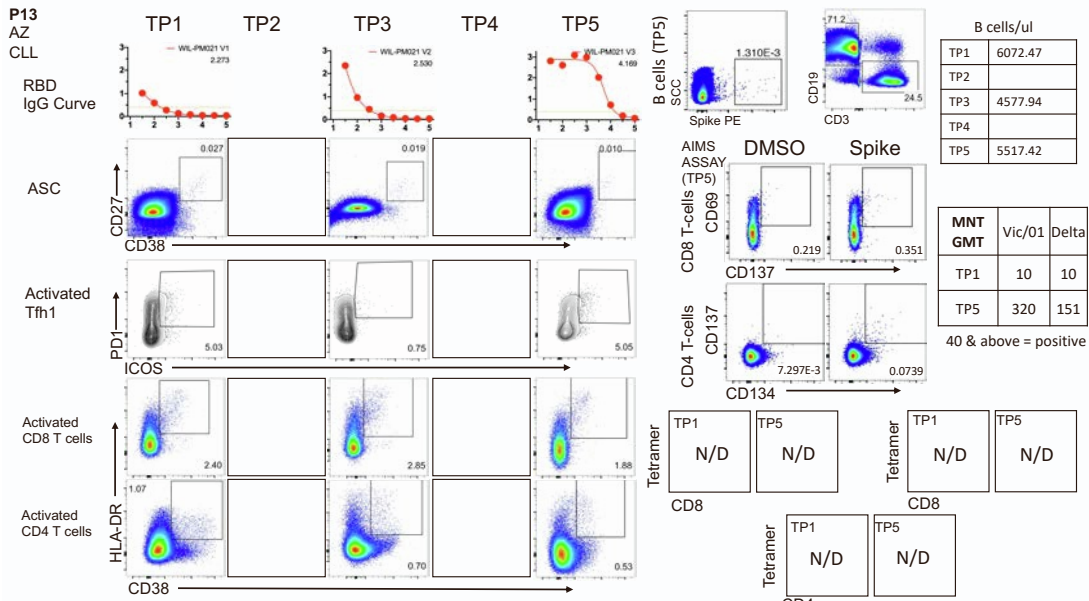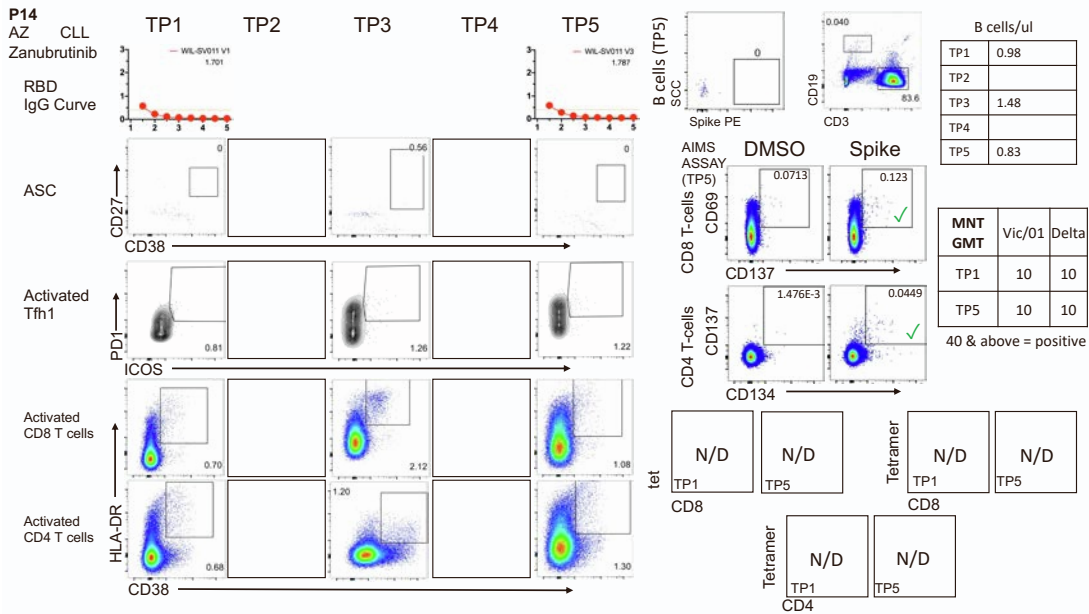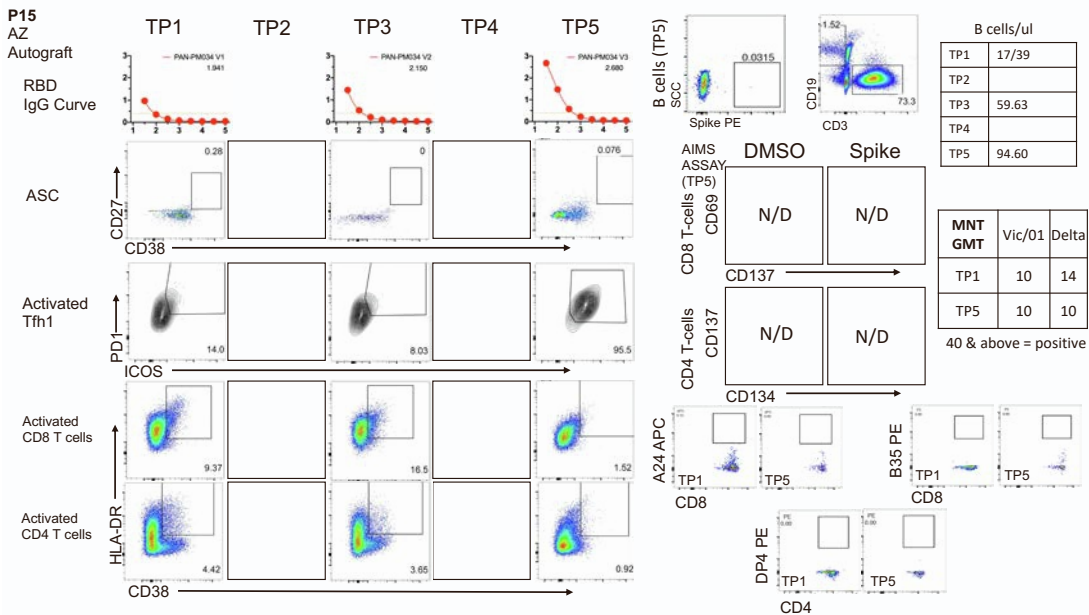



**P16**

AZ

Autograf  
RBD  
IgG Curve

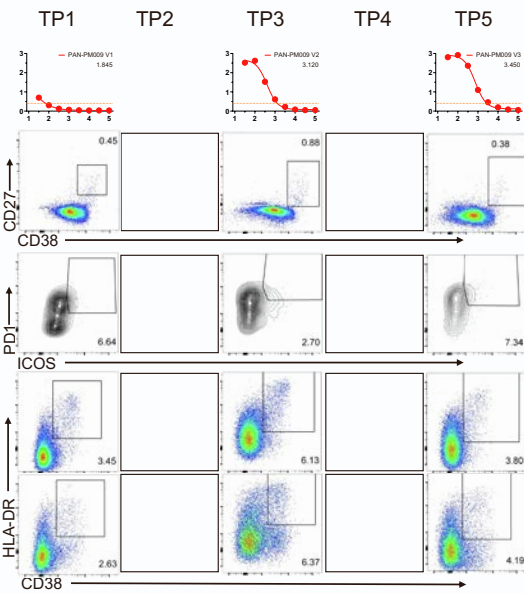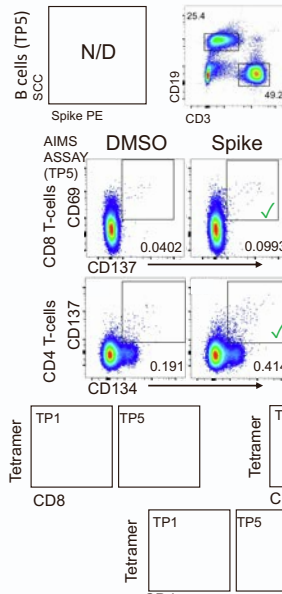

| B cells/ul |        |
|------------|--------|
| TP1        | 284.54 |
| TP2        |        |
| TP3        | 267.21 |
| TP4        |        |
| TP5        | 275.54 |

| MNT GMT | Vic/01 Delta |       |
|---------|--------------|-------|
|         | Vic/01       | Delta |
| TP1     | 10           | 10    |
| TP5     | 28           | 10    |

40 & above = positive

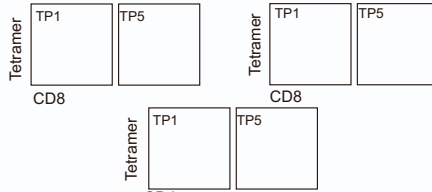

**P17**

AZ WM

Zanubrutinib  
RBD  
IgG Curve

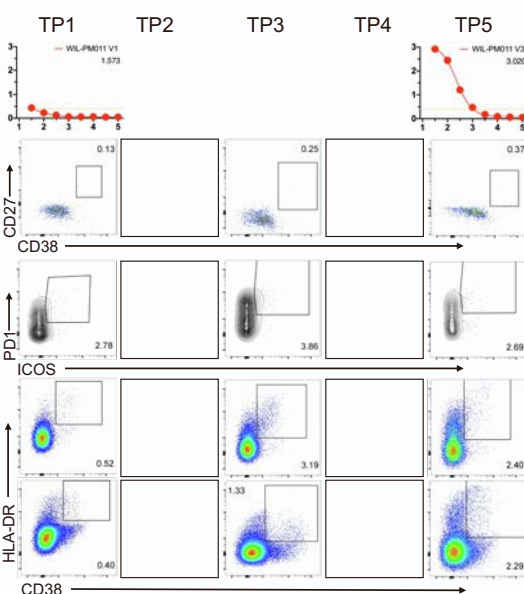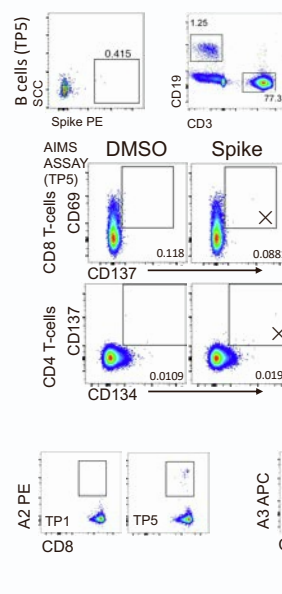

| B cells/ul |       |
|------------|-------|
| TP1        | 14.24 |
| TP2        |       |
| TP3        | 19.01 |
| TP4        |       |
| TP5        | 16.89 |

| MNT GMT | Vic/01 Delta |       |
|---------|--------------|-------|
|         | Vic/01       | Delta |
| TP1     | 10           | 10    |
| TP5     | 40           | 10    |

40 & above = positive

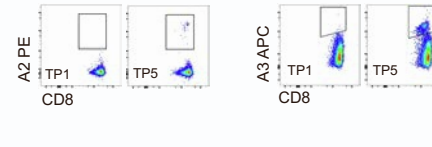

**P18**

AZ CLL

Zanubrutinib  
RBD  
IgG Curve

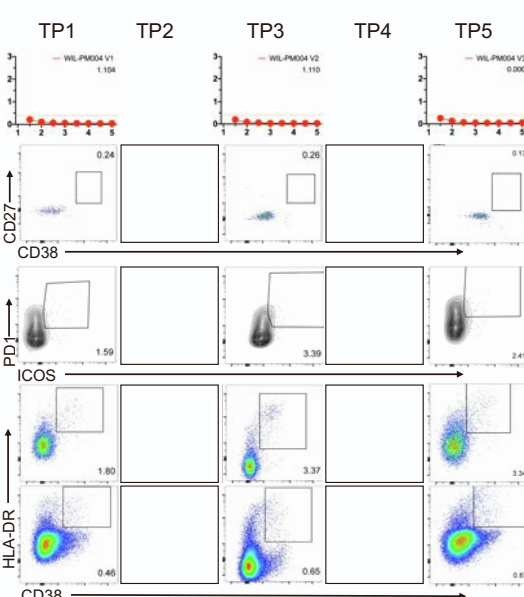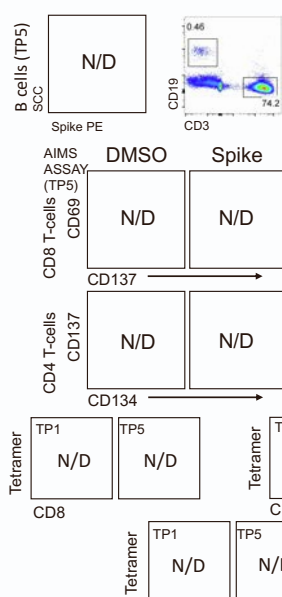

| B cells/ul |       |
|------------|-------|
| TP1        | 3.69  |
| TP2        |       |
| TP3        | 9.81  |
| TP4        |       |
| TP5        | 10.02 |

| MNT GMT | Vic/01 Delta |       |
|---------|--------------|-------|
|         | Vic/01       | Delta |
| TP1     | 10           | 10    |
| TP5     | 10           | 10    |

40 & above = positive

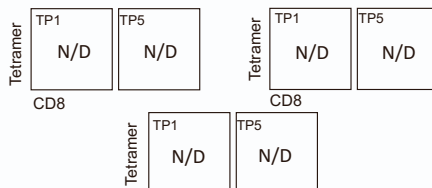



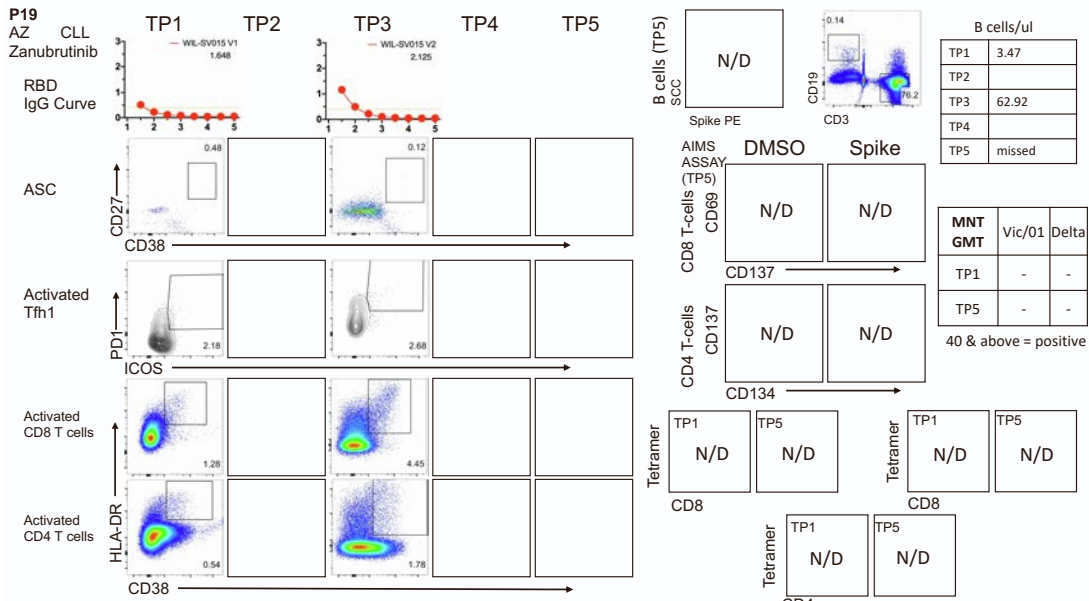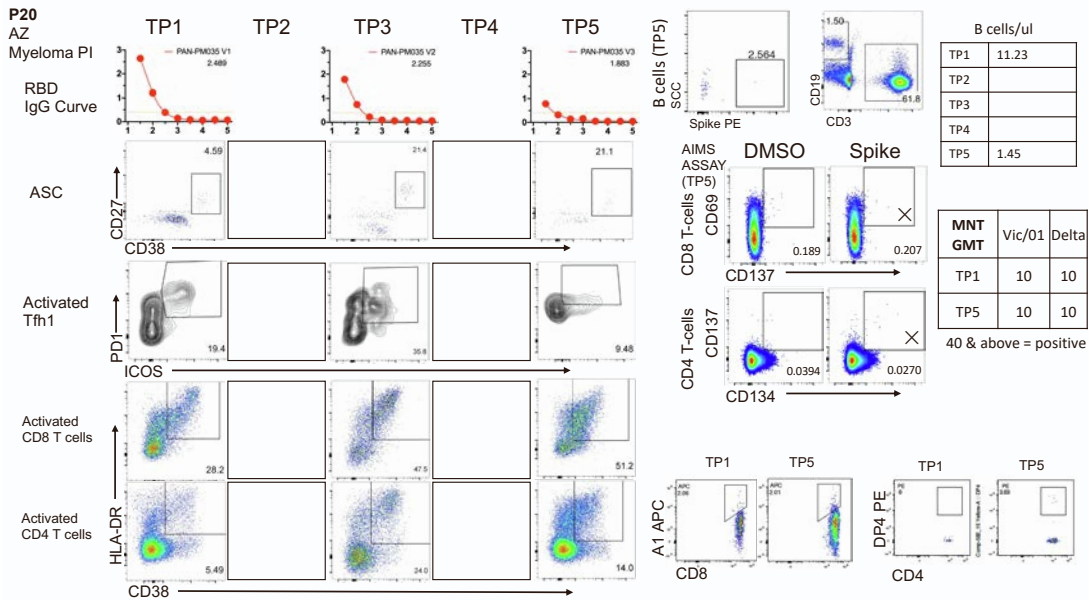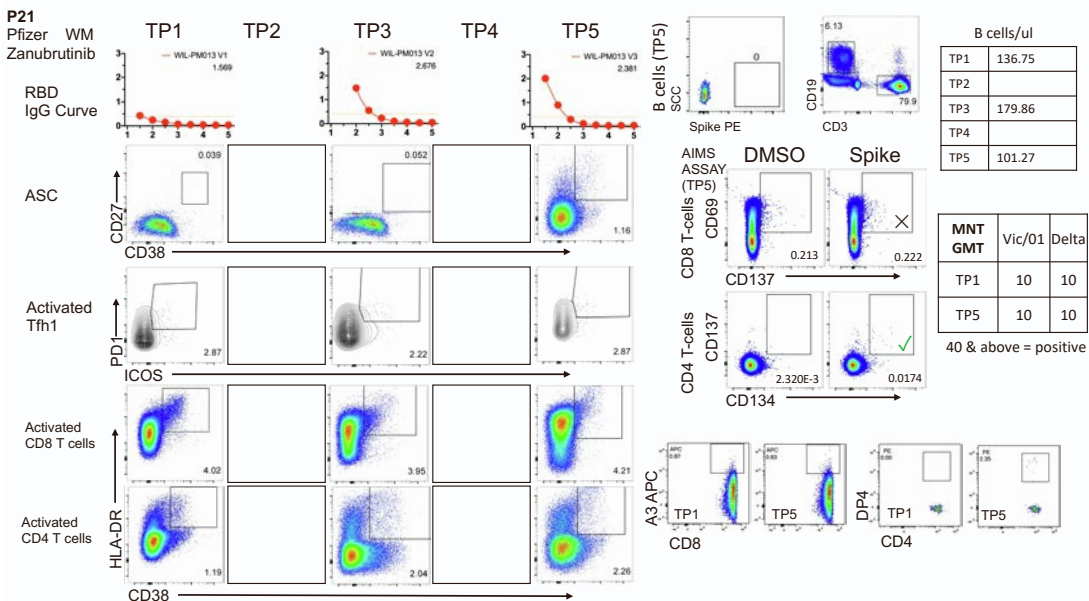

**P22**  
AZ  
CLL

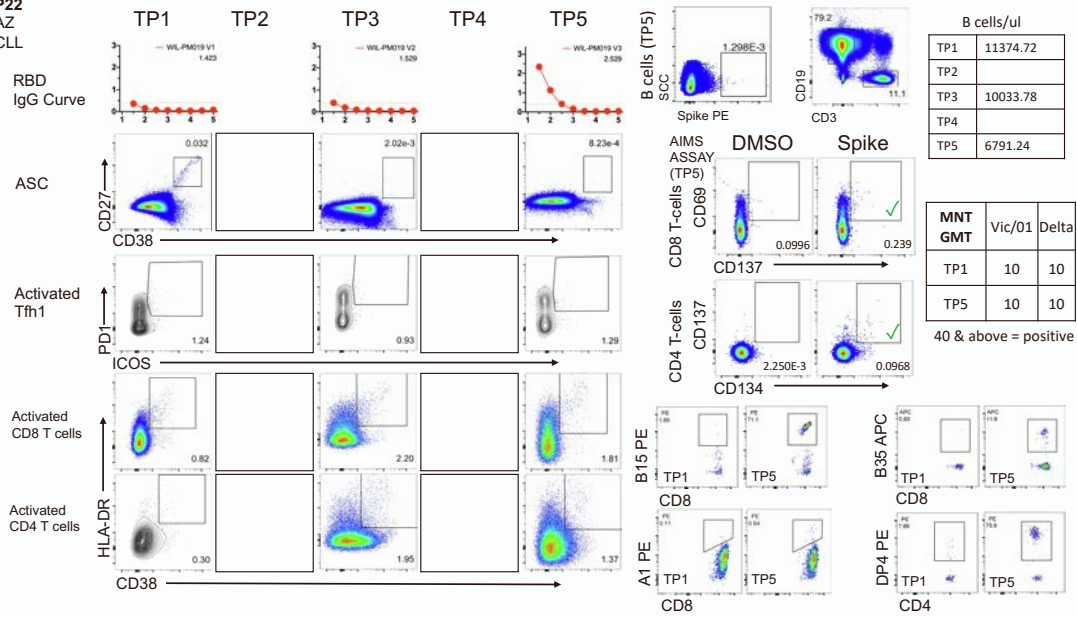

**P23**  
AZ CLL  
Venetoclax

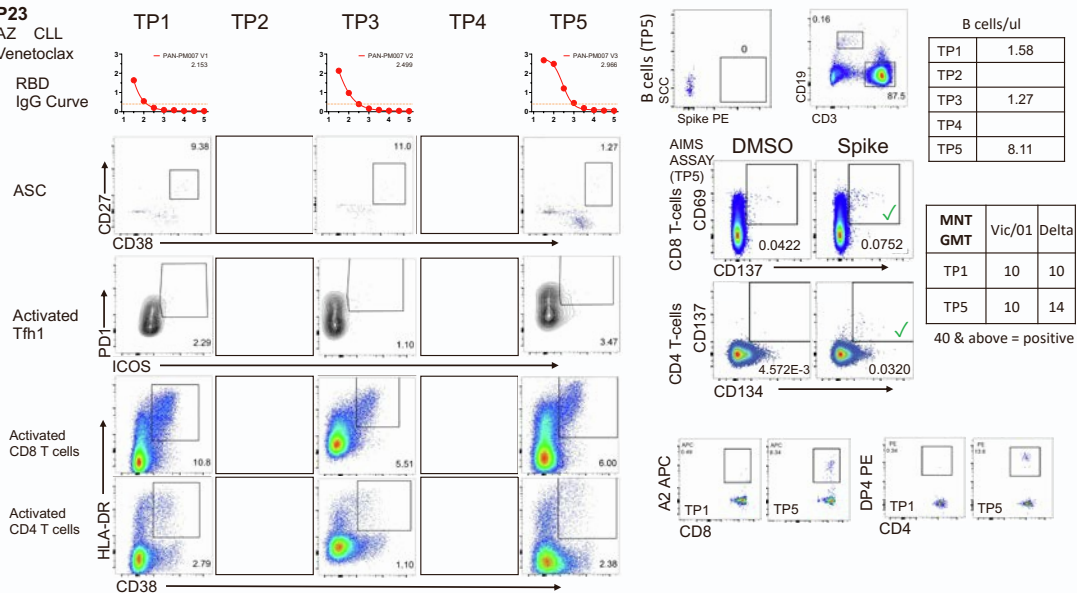

**P24**  
Pfizer  
CAR-T

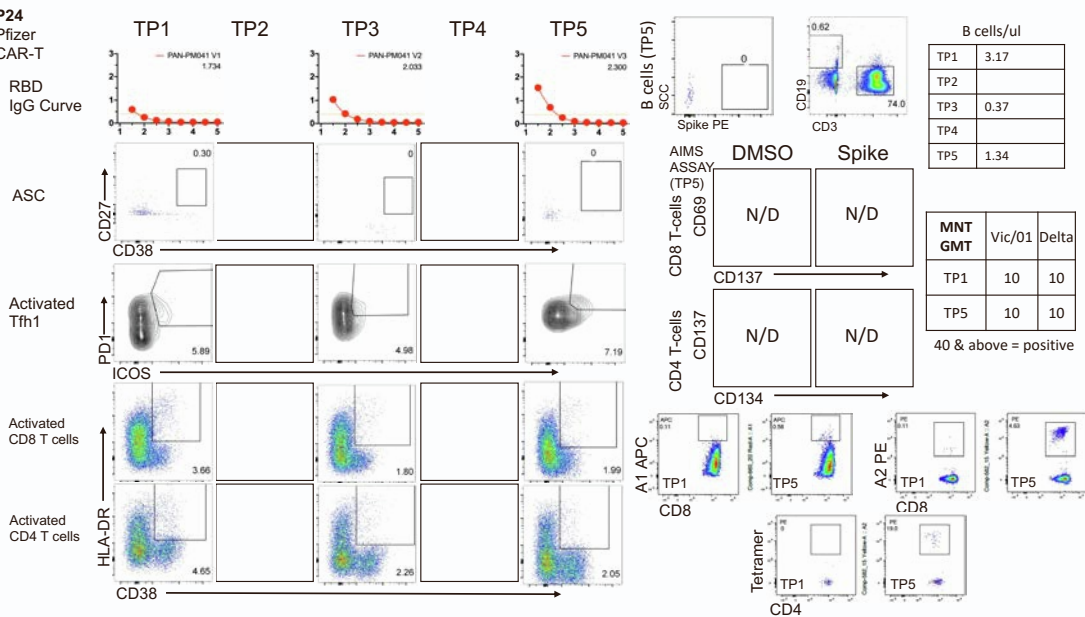

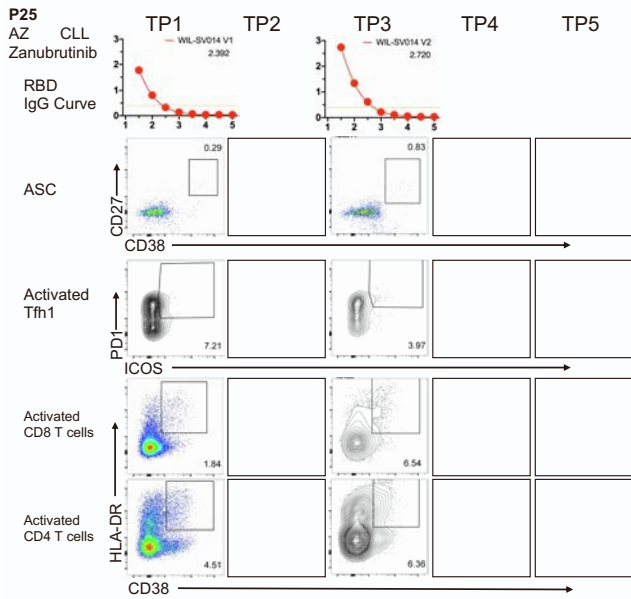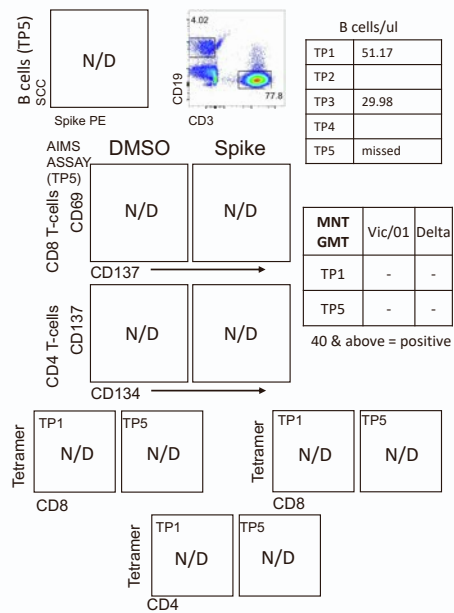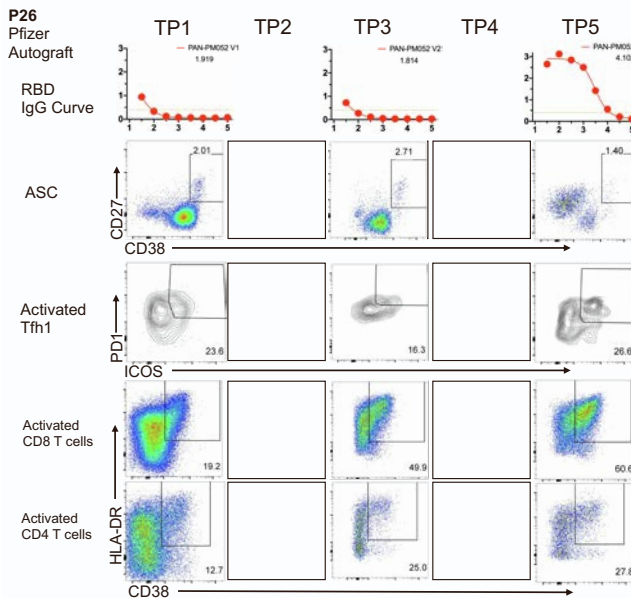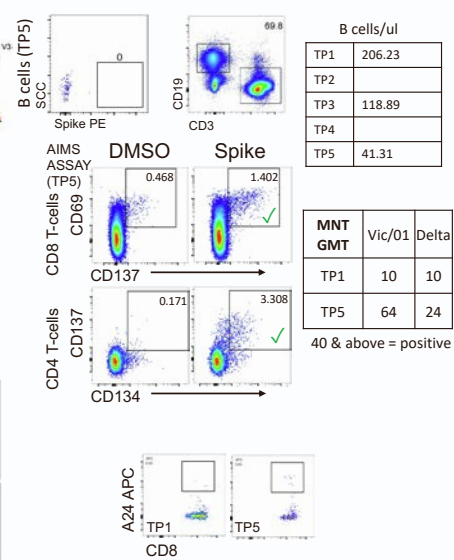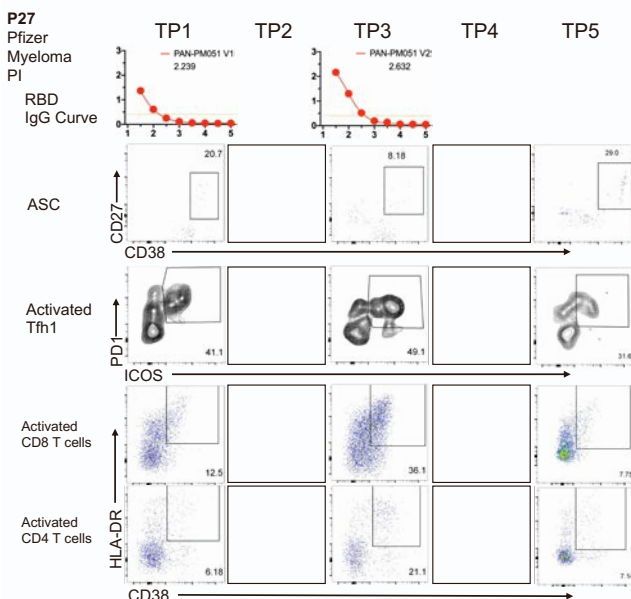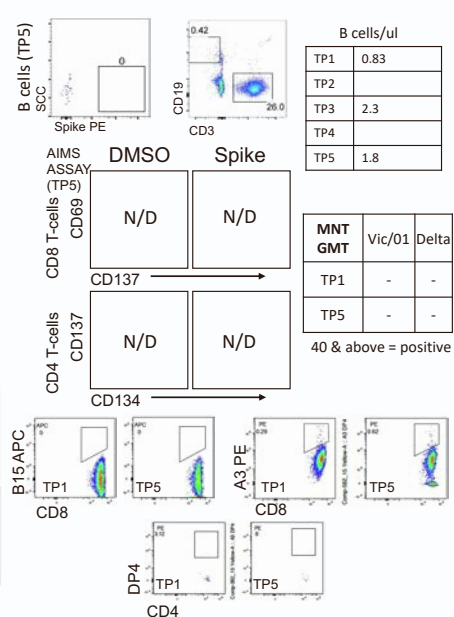

**P28**

AZ  
Autograft

RBD  
IgG Curve

ASC

Activated  
Tfh1

Activated  
CD8 T cells

Activated  
CD4 T cells

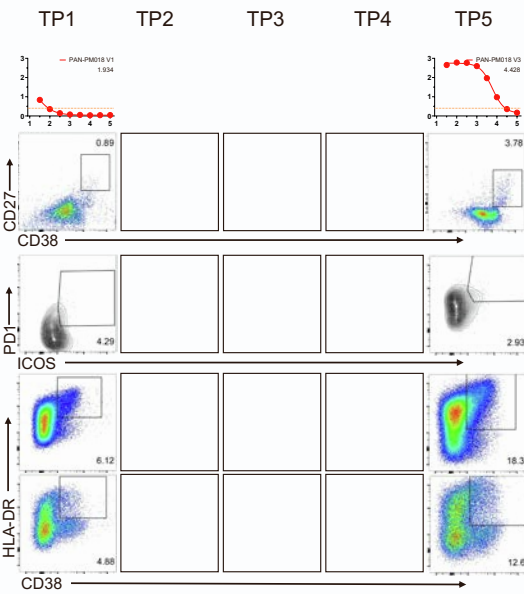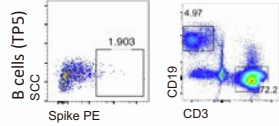

| B cells/ul |        |
|------------|--------|
| TP1        | 84.03  |
| TP2        |        |
| TP3        |        |
| TP4        |        |
| TP5        | 118.38 |

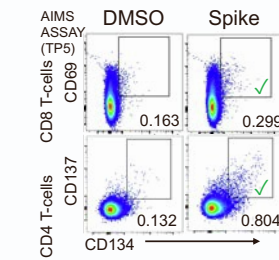

| MNT<br>GMT | Vic/01 Delta |       |
|------------|--------------|-------|
|            | Vic/01       | Delta |
| TP1        | 10           | 14    |
| TP5        | 10           | 10    |

40 & above = positive

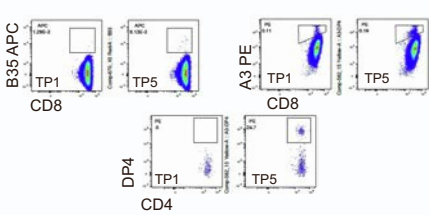

**P29**

AZ  
CLL

RBD  
IgG Curve

ASC

Activated  
Tfh1

Activated  
CD8 T cells

Activated  
CD4 T cells

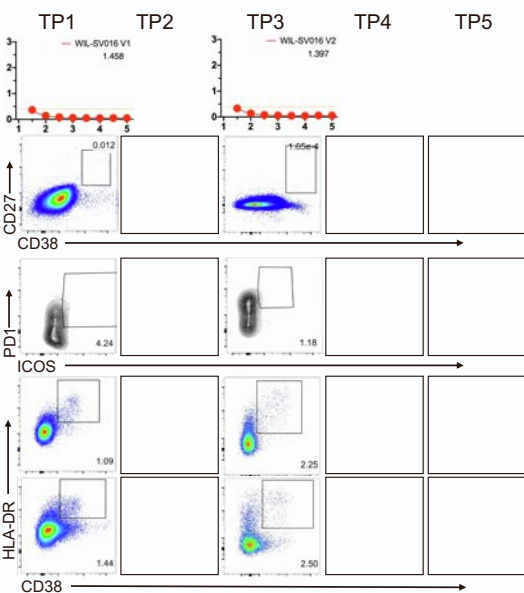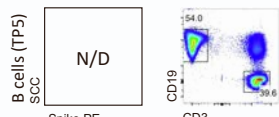

| B cells/ul |          |
|------------|----------|
| TP1        | 2704.92  |
| TP2        |          |
| TP3        | 78471.47 |
| TP4        |          |
| TP5        | missed   |

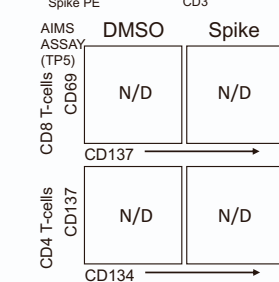

| MNT<br>GMT | Vic/01 Delta |       |
|------------|--------------|-------|
|            | Vic/01       | Delta |
| TP1        | -            | -     |
| TP5        | -            | -     |

40 & above = positive

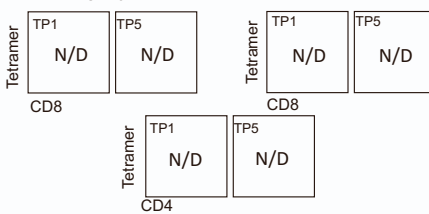

**P30**

AZ  
Autograft

RBD  
IgG Curve

ASC

Activated  
Tfh1

Activated  
CD8 T cells

Activated  
CD4 T cells

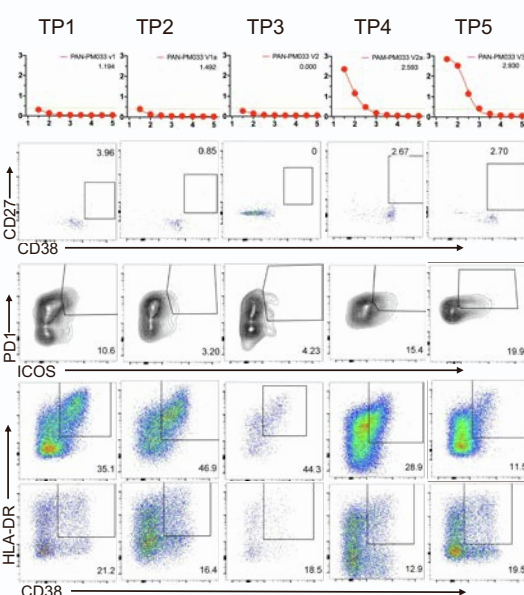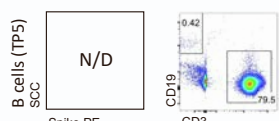

| B cells/ul |       |
|------------|-------|
| TP1        | 1.7   |
| TP2        | 1.84  |
| TP3        | 44.91 |
| TP4        | 3.48  |
| TP5        | 2.11  |

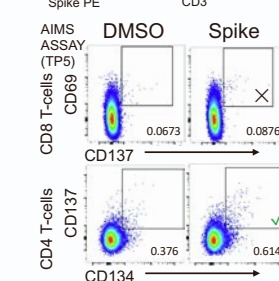

| MNT<br>GMT | Vic/01 Delta |       |
|------------|--------------|-------|
|            | Vic/01       | Delta |
| TP1        | 10           | 10    |
| TP5        | 28           | 10    |

40 & above = positive

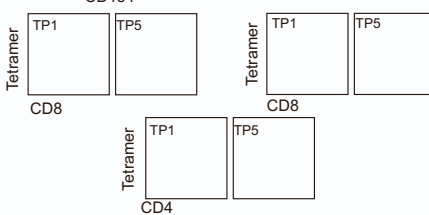



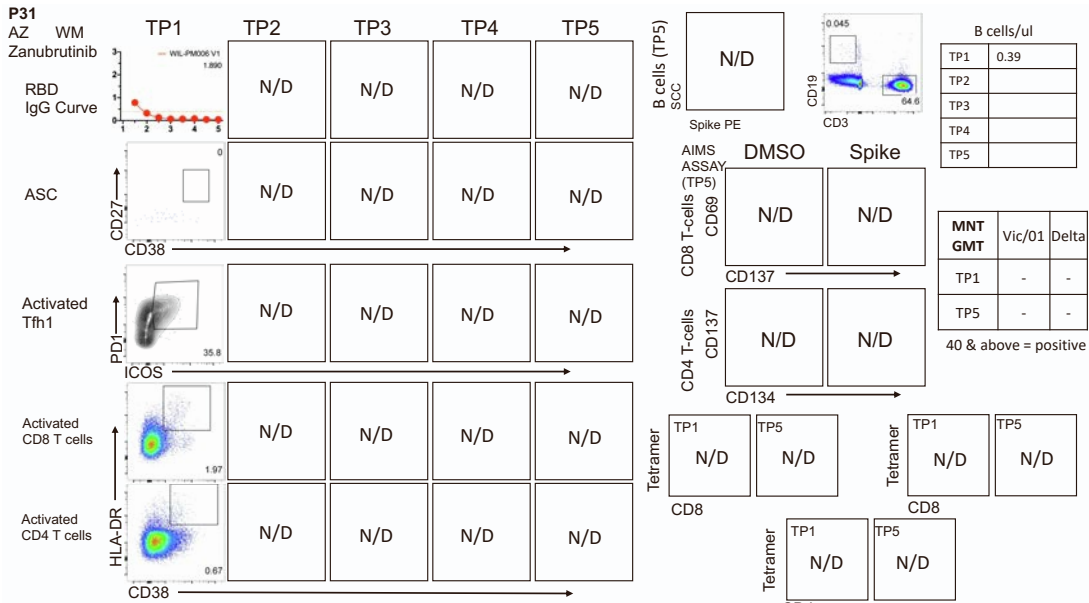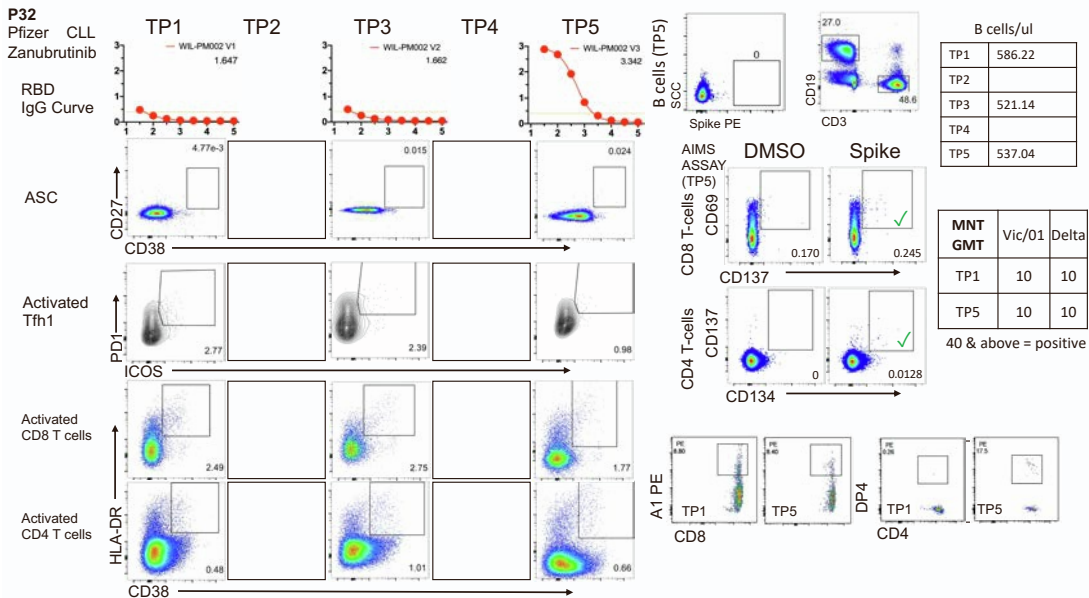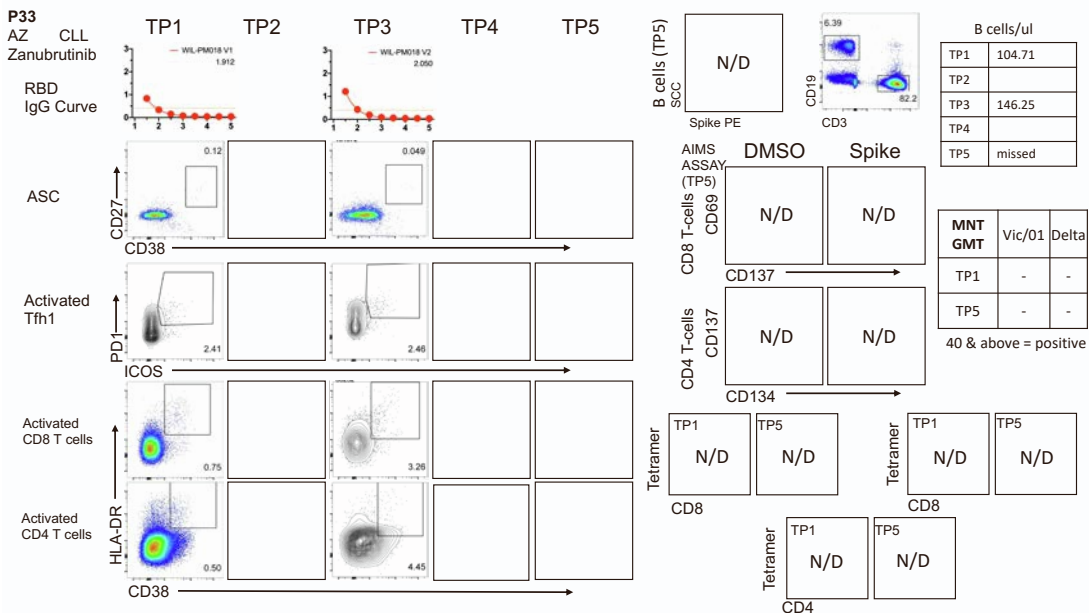

**P34**  
AZ

Myeloma  
RBD  
IgG Curve

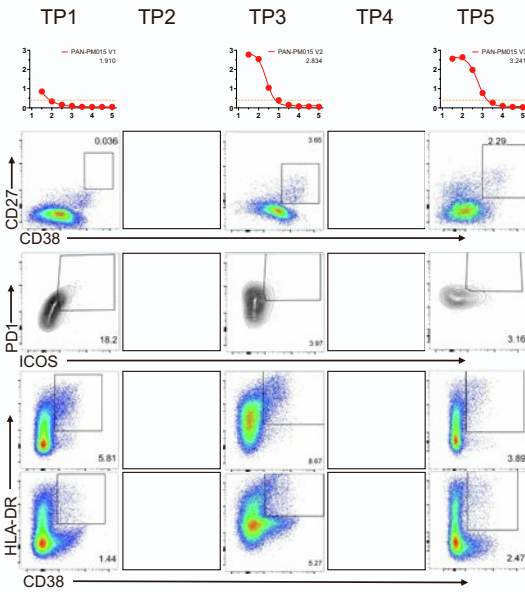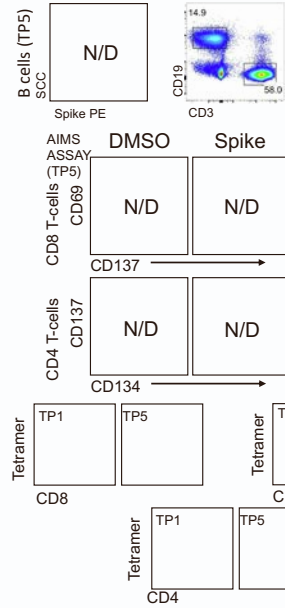

| B cells/ul |        |
|------------|--------|
| TP1        | 321.92 |
| TP2        |        |
| TP3        | 181.14 |
| TP4        |        |
| TP5        | 209.00 |

| MNT GMT | Vic/01 Delta |       |
|---------|--------------|-------|
|         | Vic/01       | Delta |
| TP1     | 10           | 10    |
| TP5     | 40           | 10    |

40 & above = positive

**P35**  
AZ

CLL  
Treatment naive  
RBD  
IgG Curve

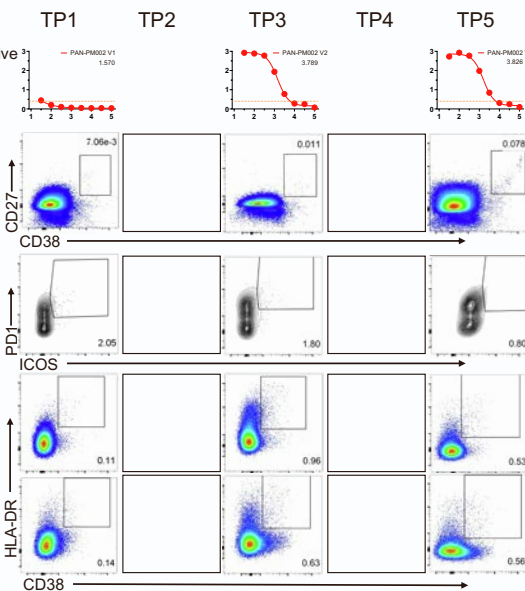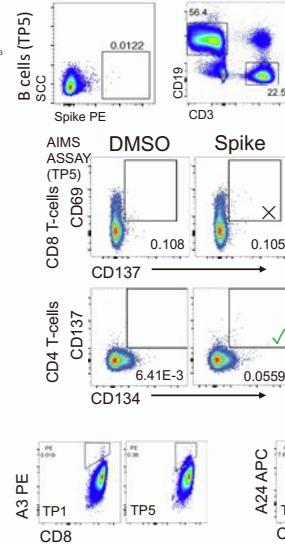

| B cells/ul |         |
|------------|---------|
| TP1        | 4892.95 |
| TP2        |         |
| TP3        | 4057.83 |
| TP4        |         |
| TP5        | 3455.95 |

| MNT GMT | Vic/01 Delta |       |
|---------|--------------|-------|
|         | Vic/01       | Delta |
| TP1     | 10           | 10    |
| TP5     | 107          | 45    |

40 & above = positive

**P36**  
AZ

WM  
Zanubrutinib  
RBD  
IgG Curve

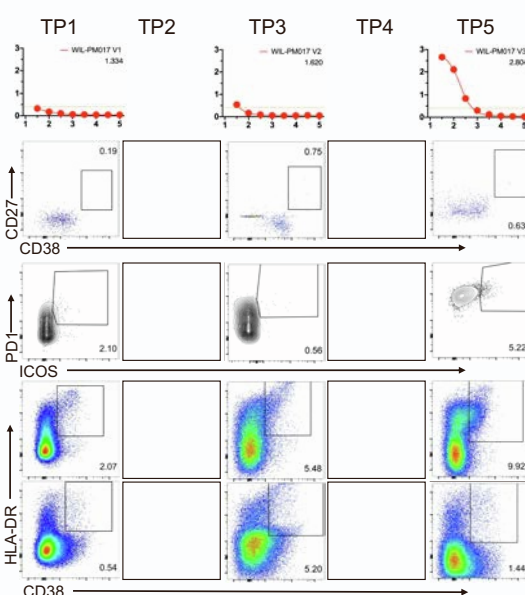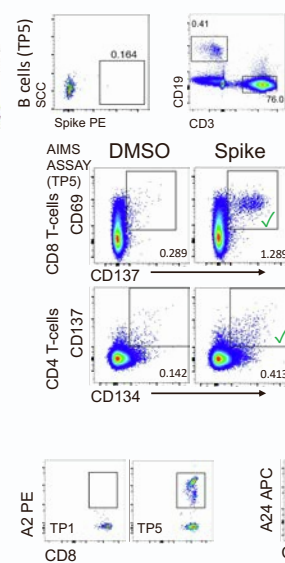

| B cells/ul |       |
|------------|-------|
| TP1        | 9.76  |
| TP2        |       |
| TP3        | 14.96 |
| TP4        |       |
| TP5        | 12.12 |

| MNT GMT | Vic/01 Delta |       |
|---------|--------------|-------|
|         | Vic/01       | Delta |
| TP1     | 10           | 10    |
| TP5     | 10           | 10    |

40 & above = positive

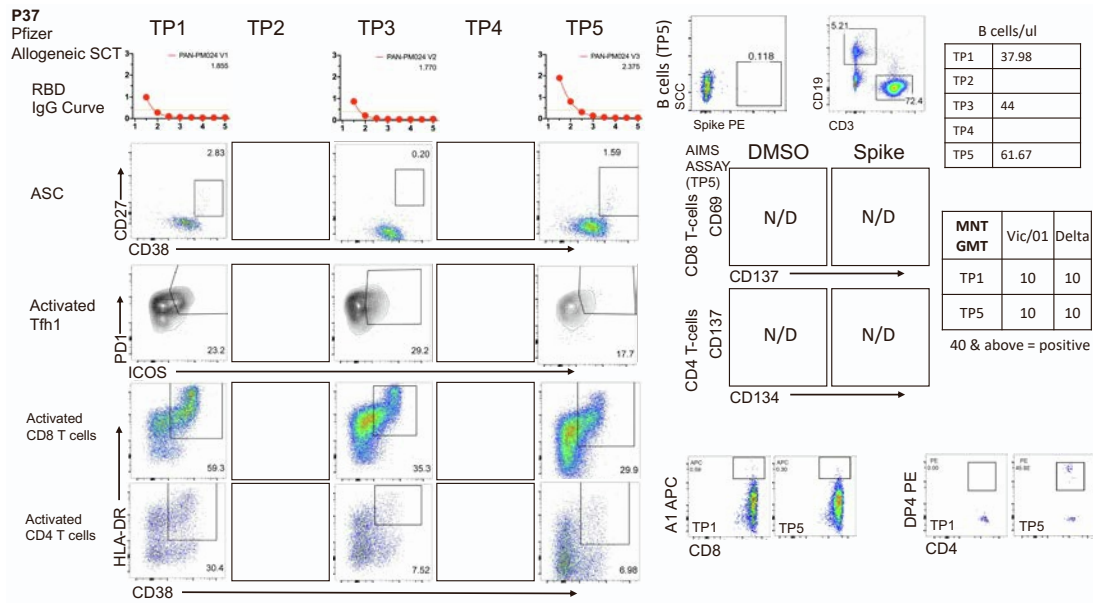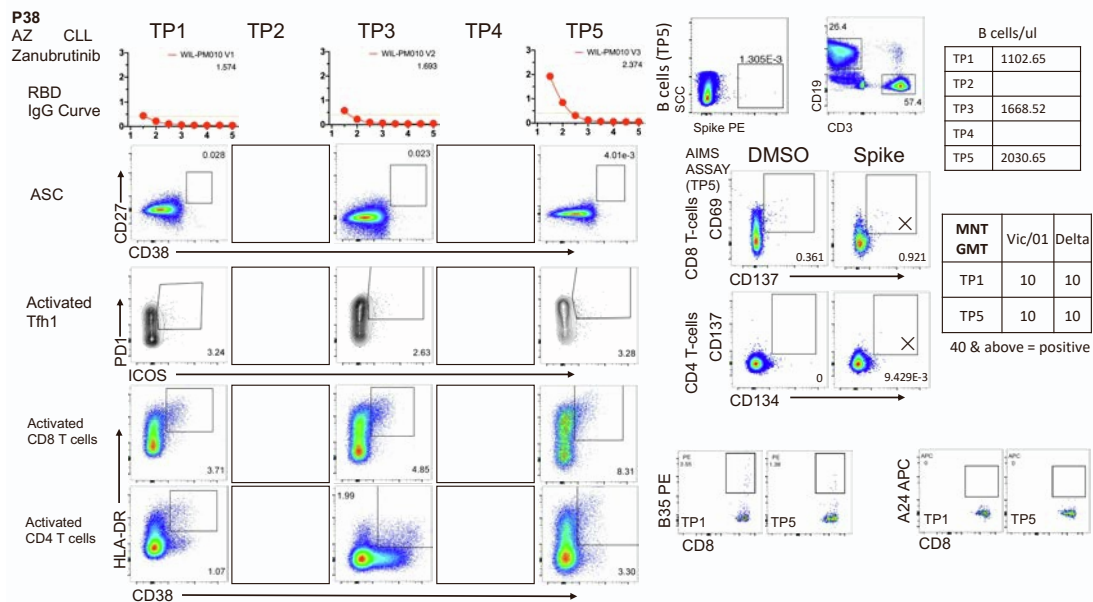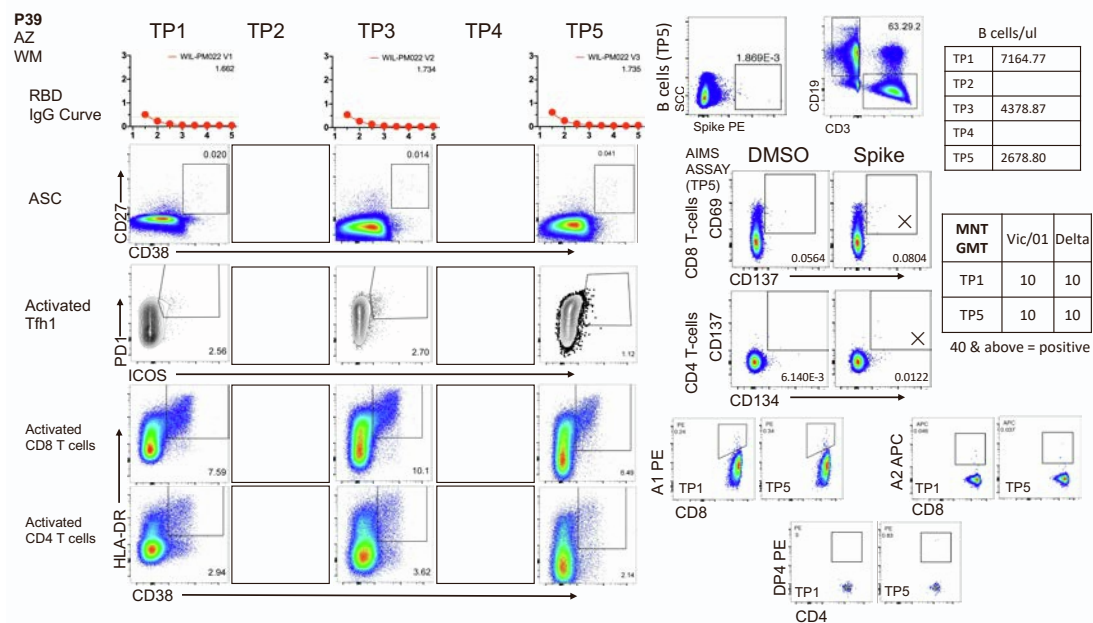

**P40**  
AZ  
CLL

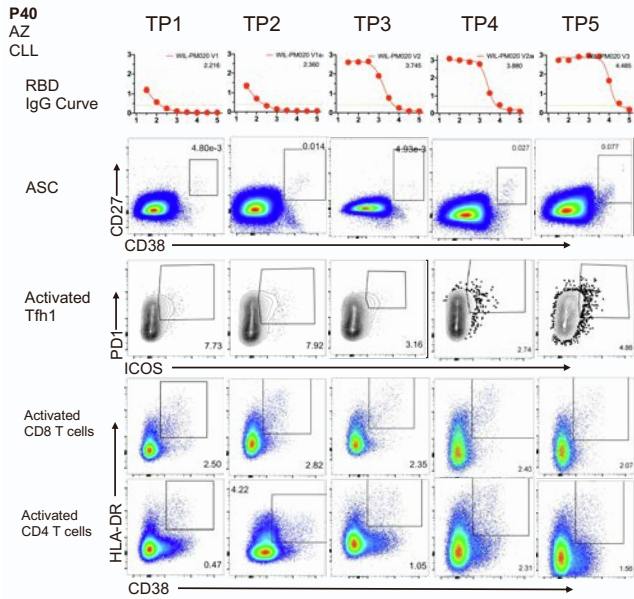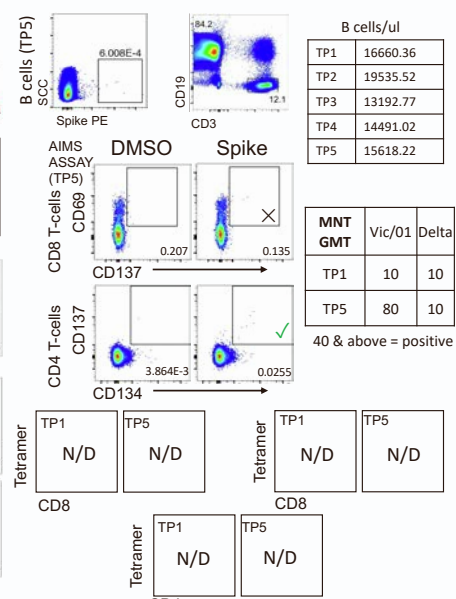

|            | TP1      | TP2      | TP3      | TP4      | TP5      |
|------------|----------|----------|----------|----------|----------|
| B cells/ul | 16660.36 | 19535.52 | 13192.77 | 14491.02 | 15618.22 |

| MNT GMT | Vic/01 | Delta |
|---------|--------|-------|
| TP1     | 10     | 10    |
| TP5     | 80     | 10    |

40 & above = positive

| Tetramer | TP1 | TP5 |
|----------|-----|-----|
| CD8      | N/D | N/D |
| CD4      | N/D | N/D |

**P41**  
AZ  
CLL

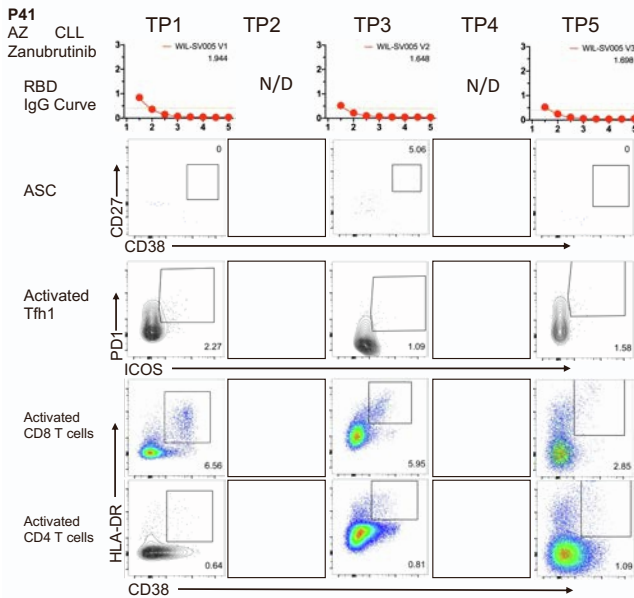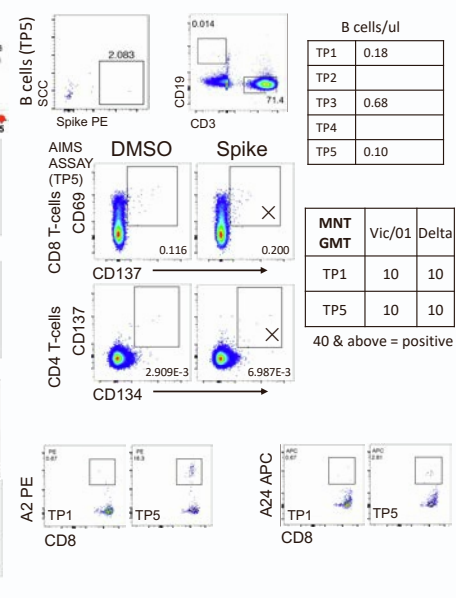

|            | TP1  | TP2 | TP3  | TP4 | TP5  |
|------------|------|-----|------|-----|------|
| B cells/ul | 0.18 |     | 0.68 |     | 0.10 |

| MNT GMT | Vic/01 | Delta |
|---------|--------|-------|
| TP1     | 10     | 10    |
| TP5     | 10     | 10    |

40 & above = positive

**P42**  
AZ  
CLL

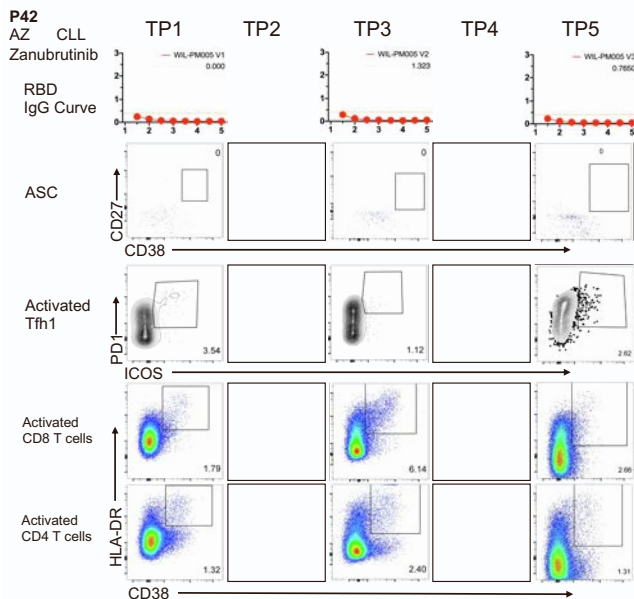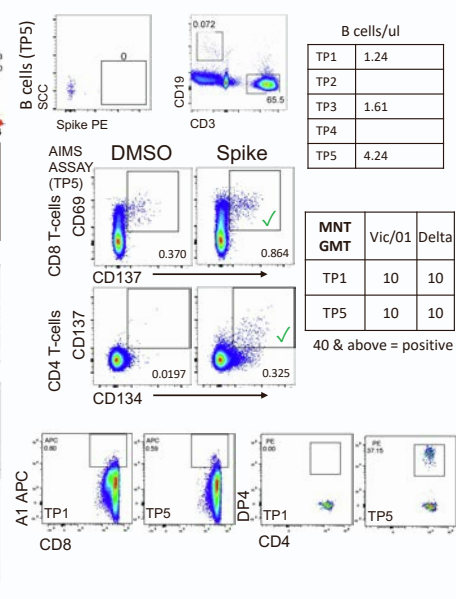

|            | TP1  | TP2 | TP3  | TP4 | TP5  |
|------------|------|-----|------|-----|------|
| B cells/ul | 1.24 |     | 1.61 |     | 4.24 |

| MNT GMT | Vic/01 | Delta |
|---------|--------|-------|
| TP1     | 10     | 10    |
| TP5     | 10     | 10    |

40 & above = positive



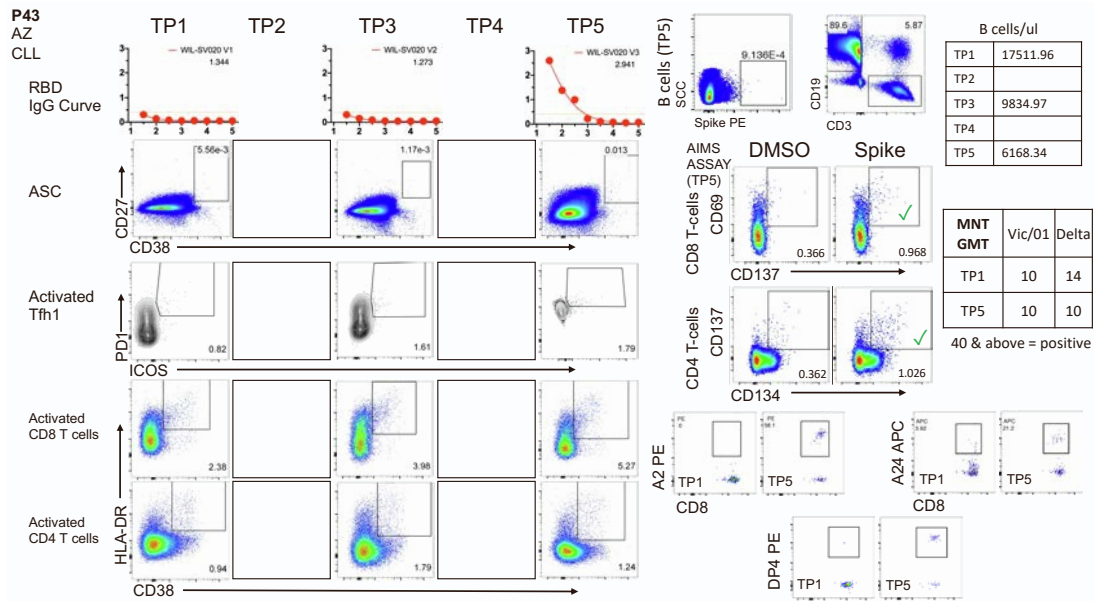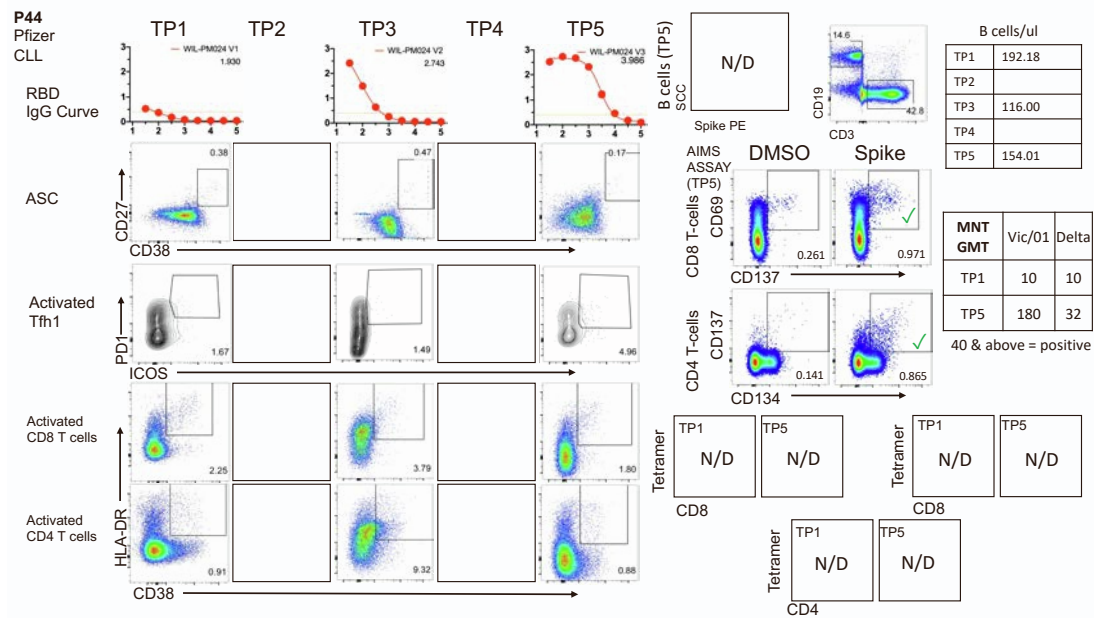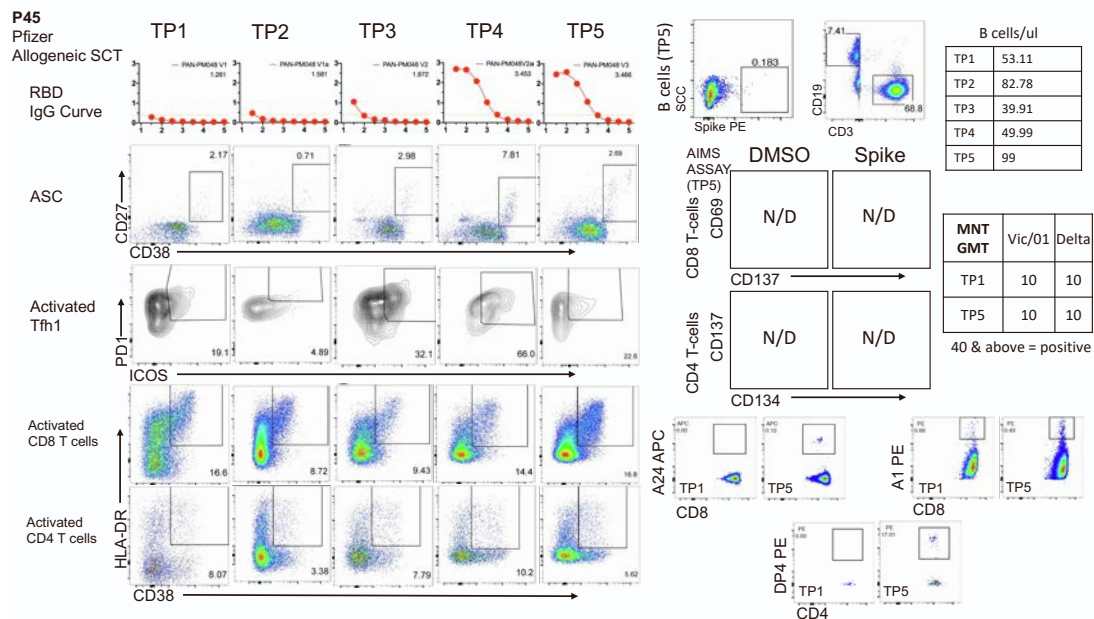

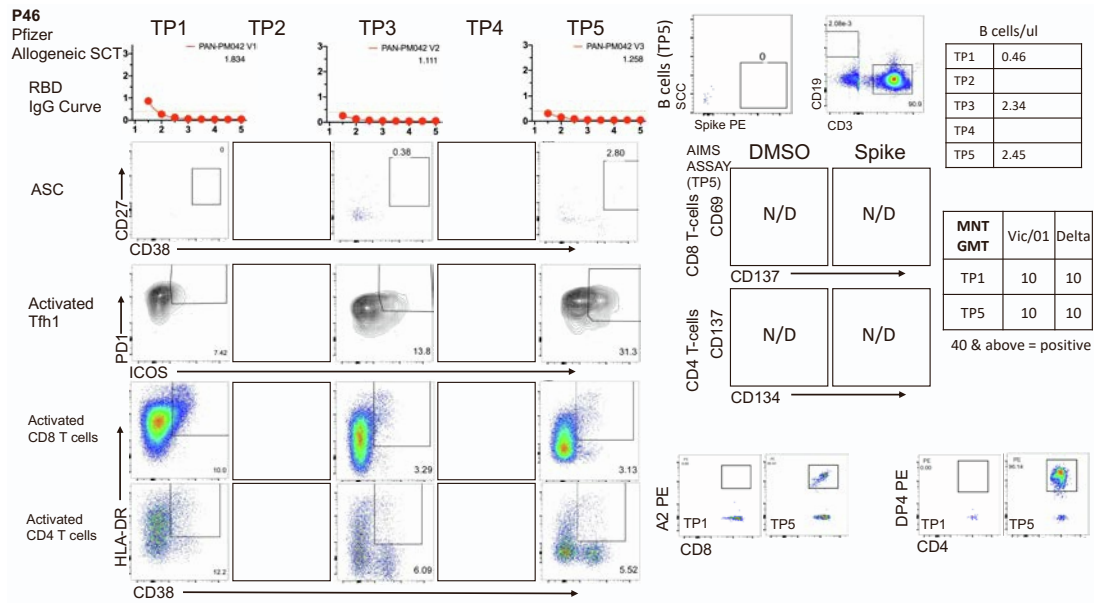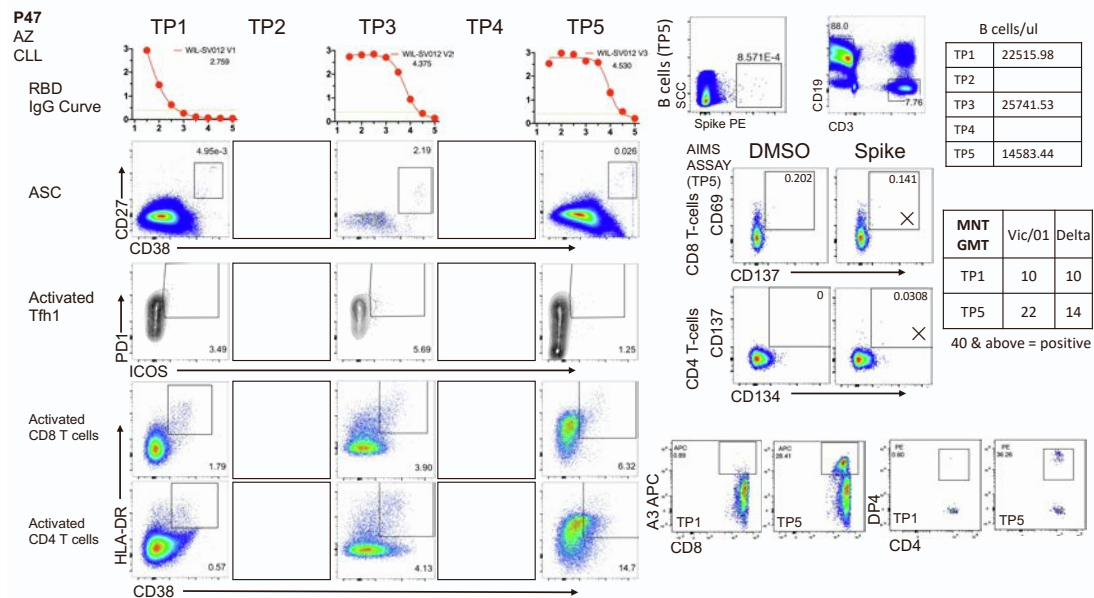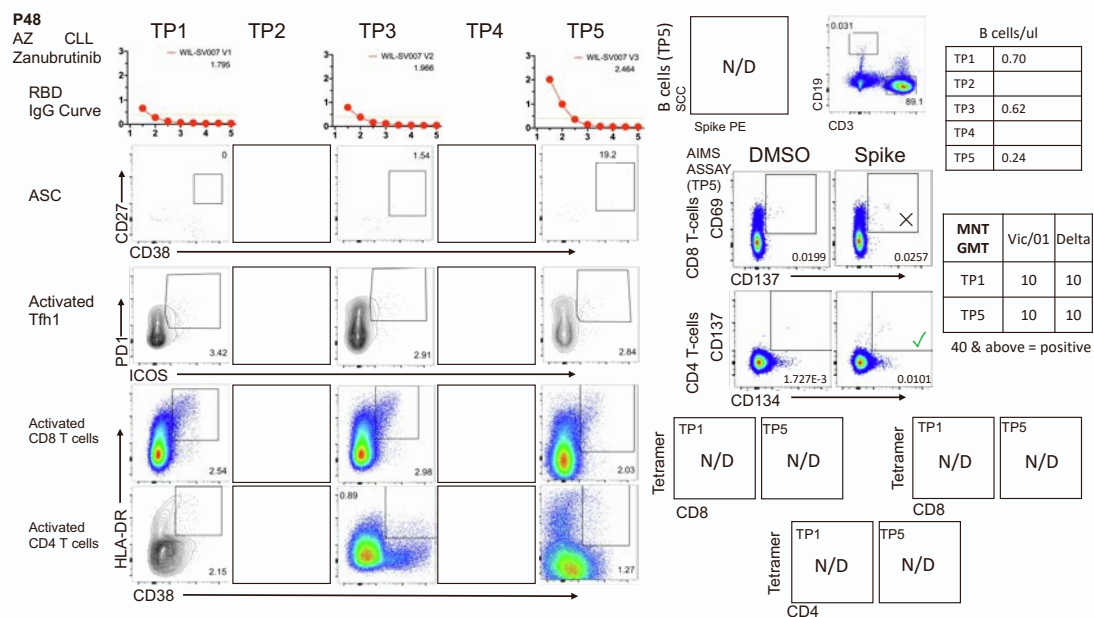

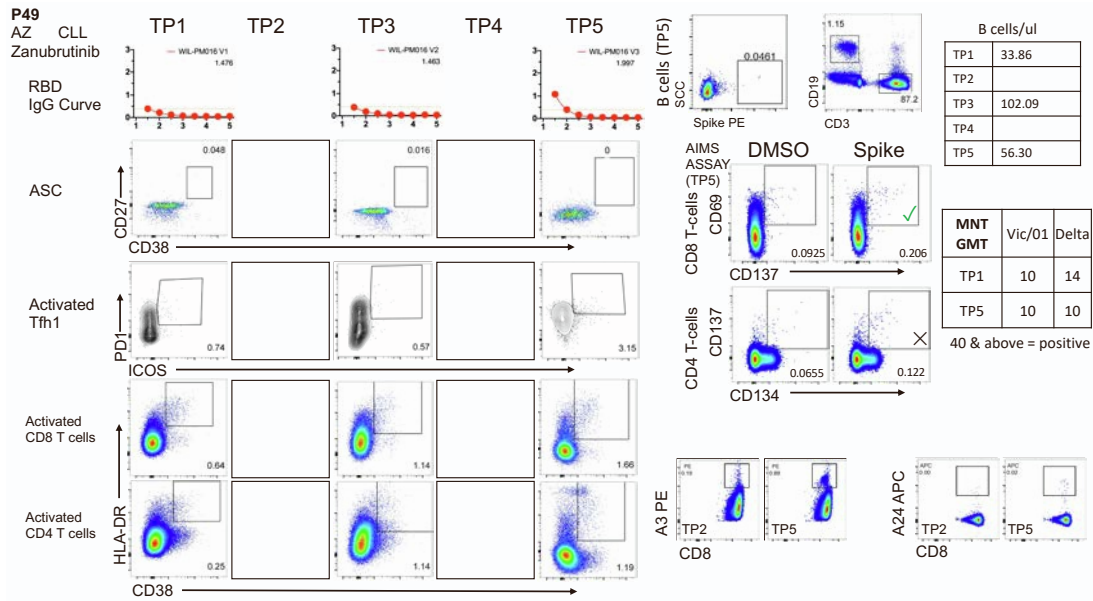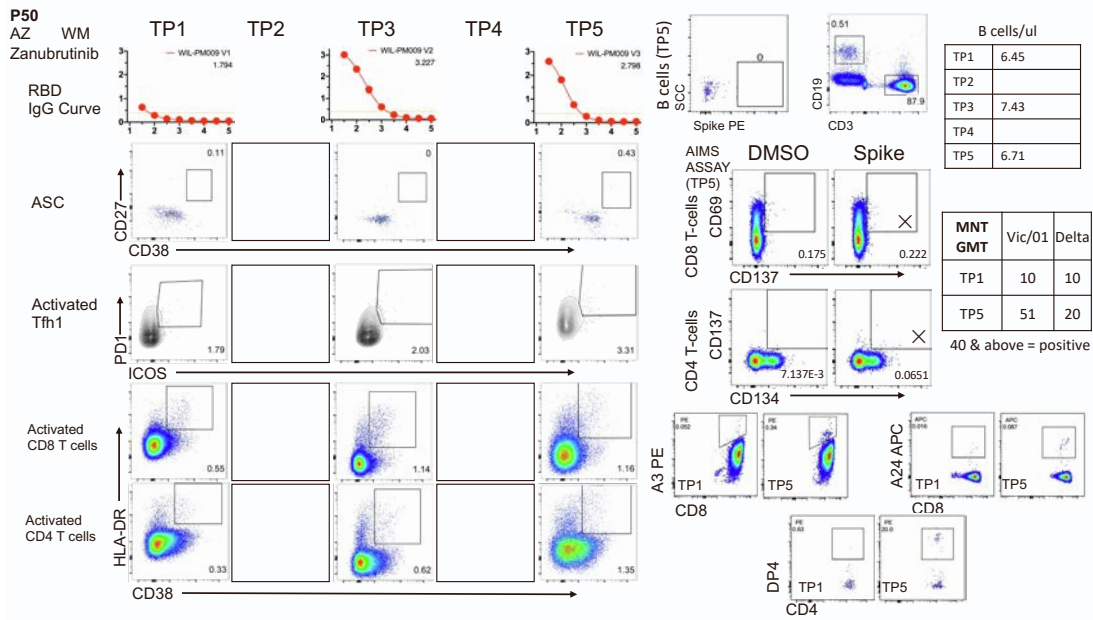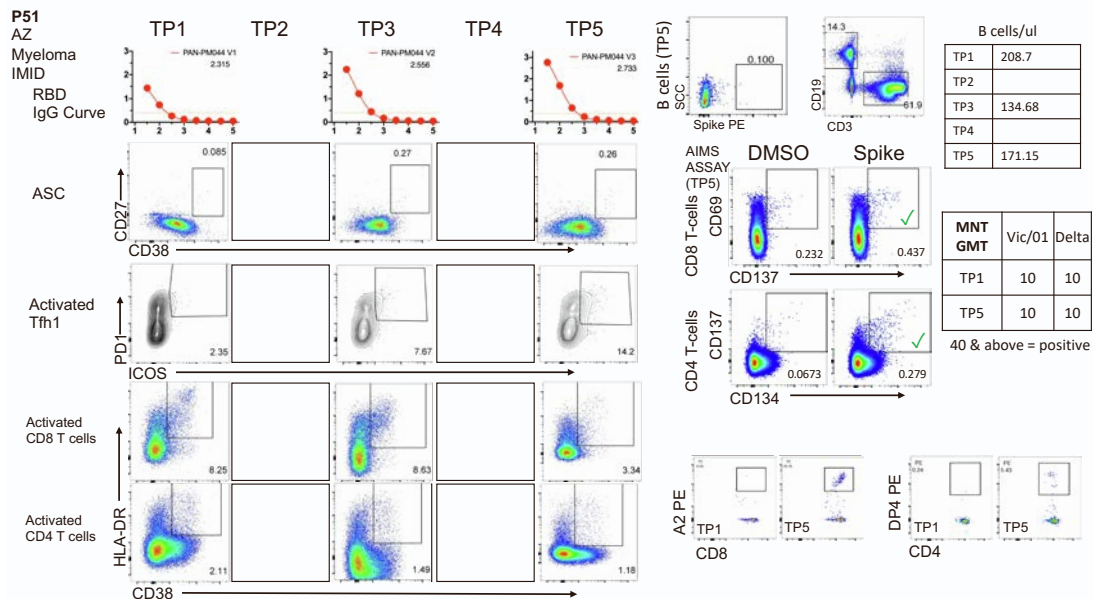

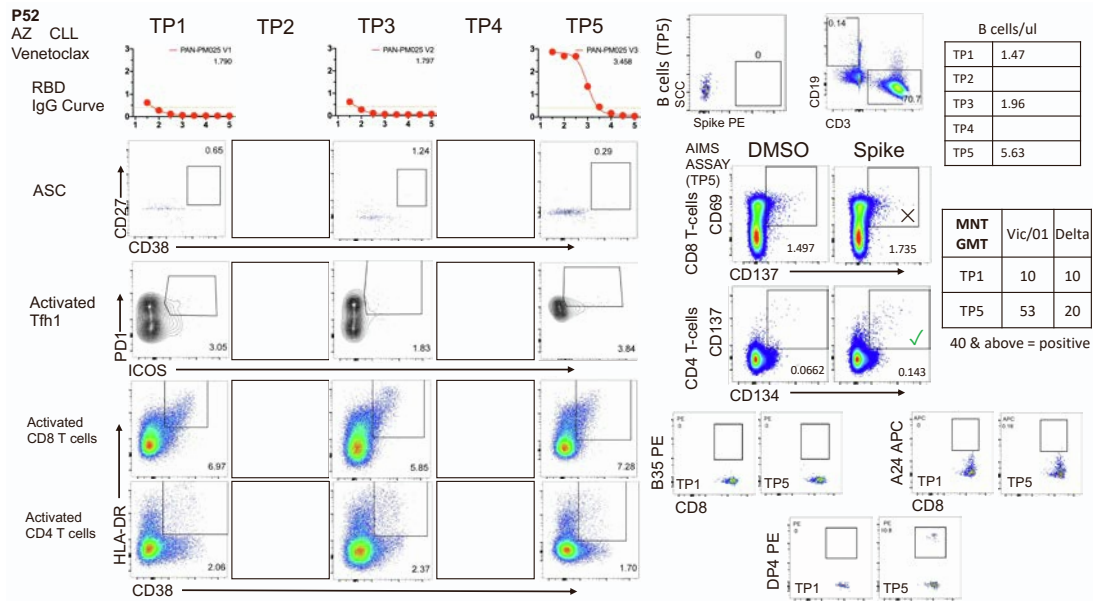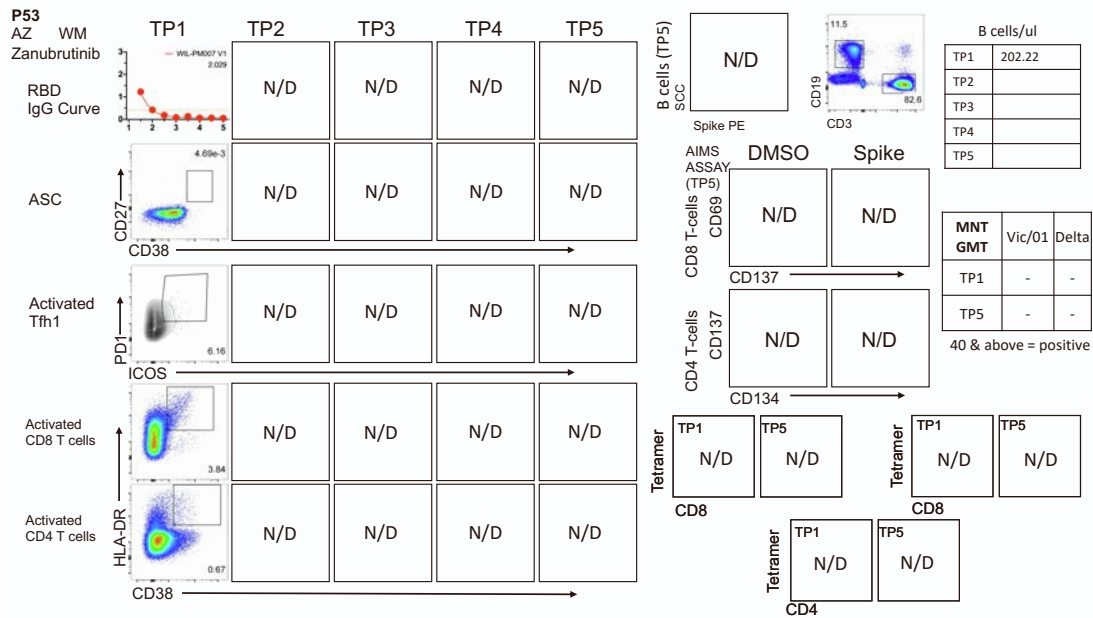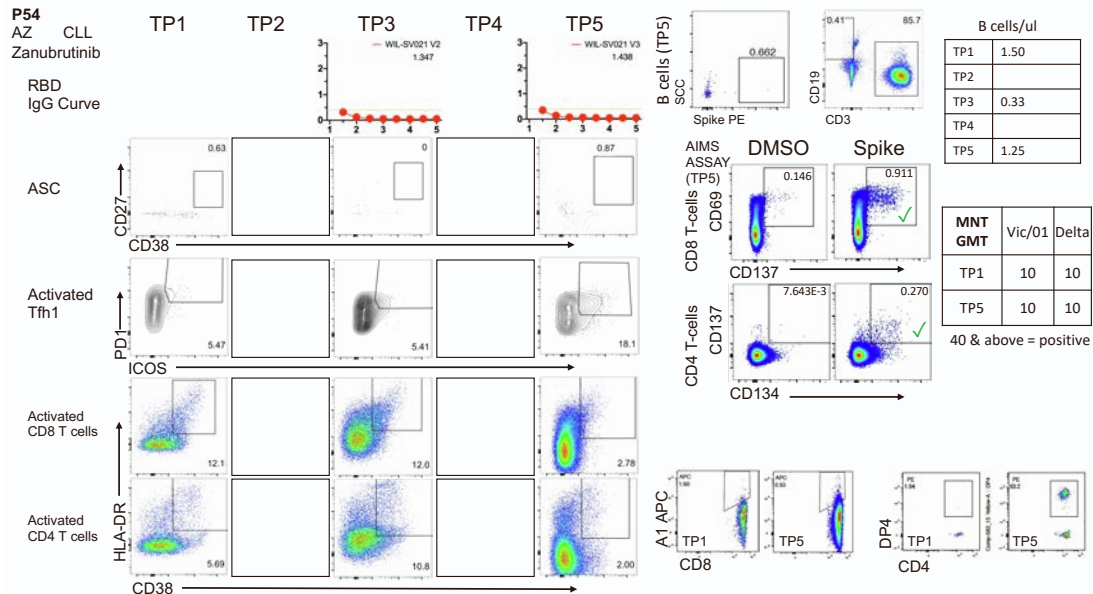



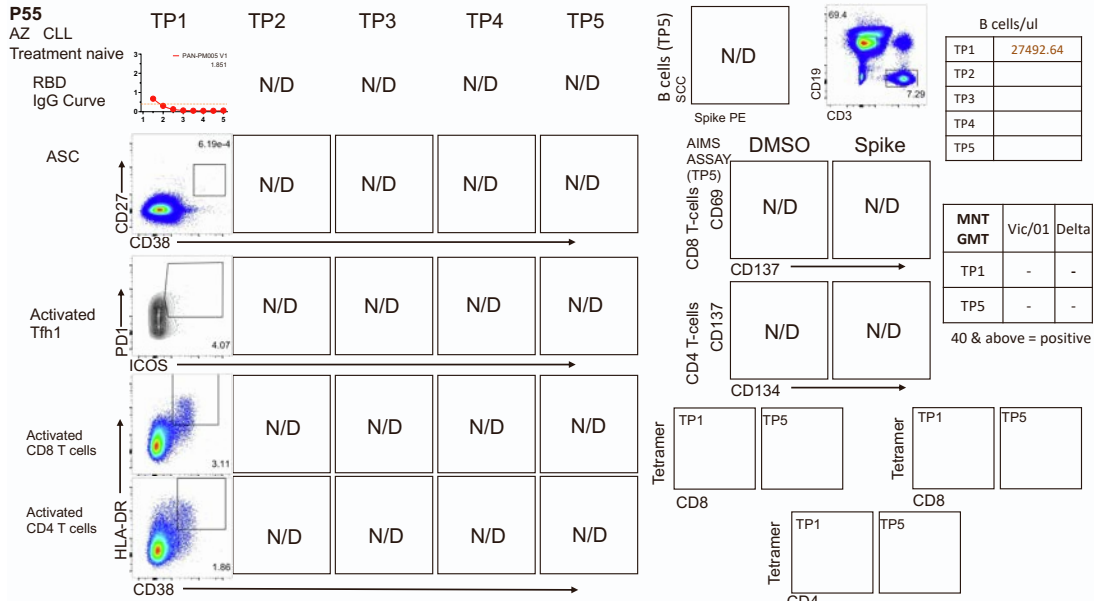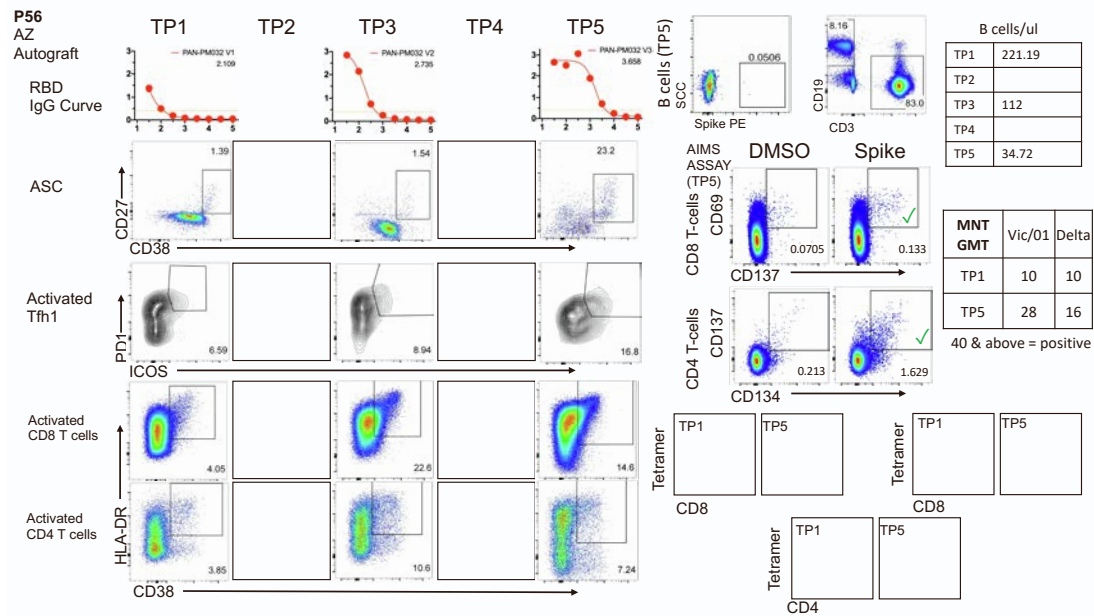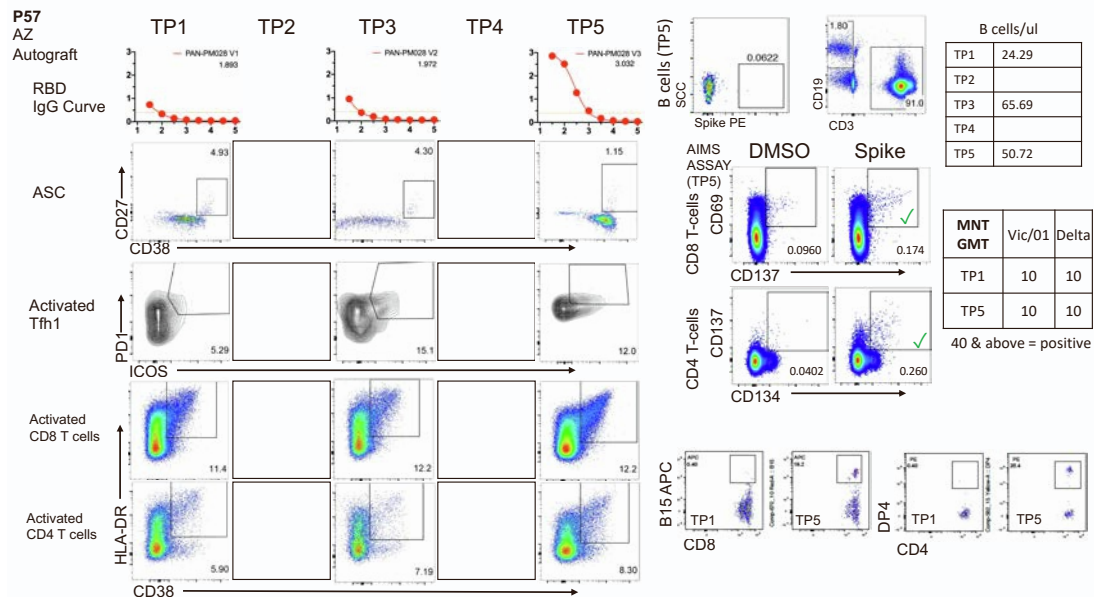

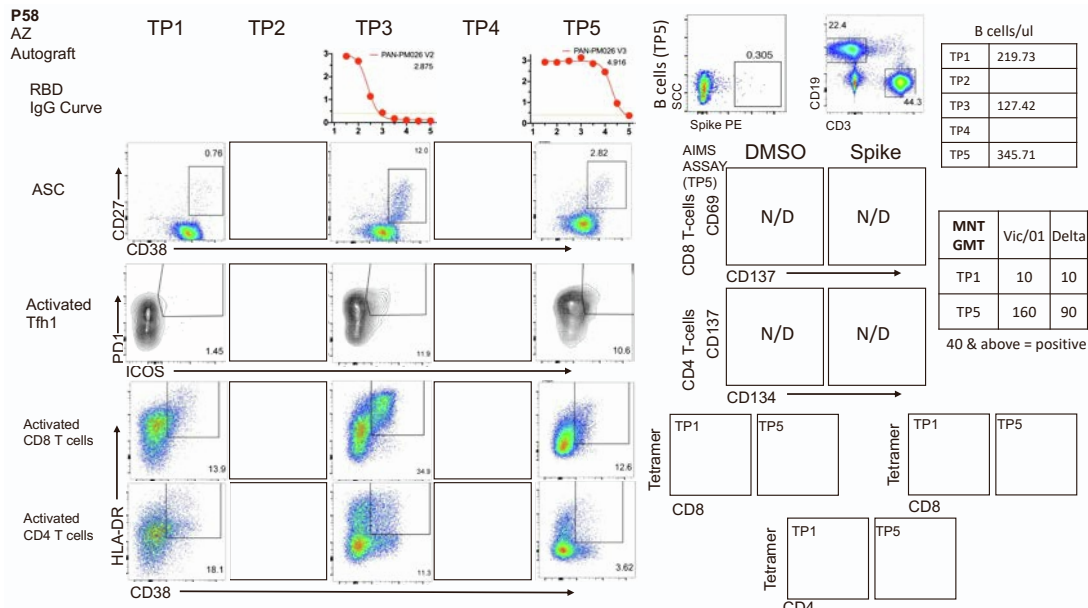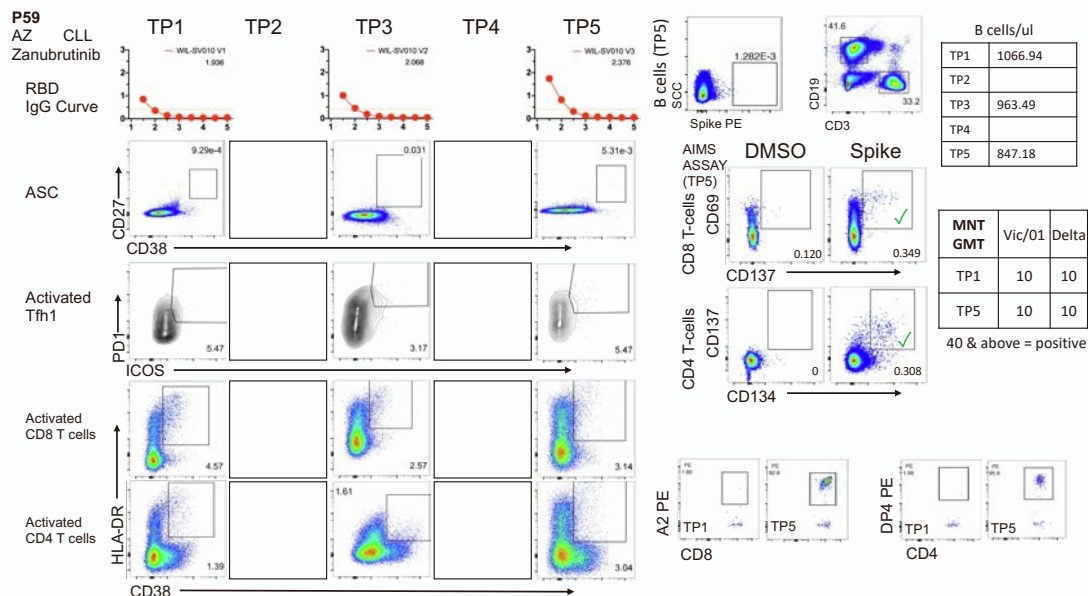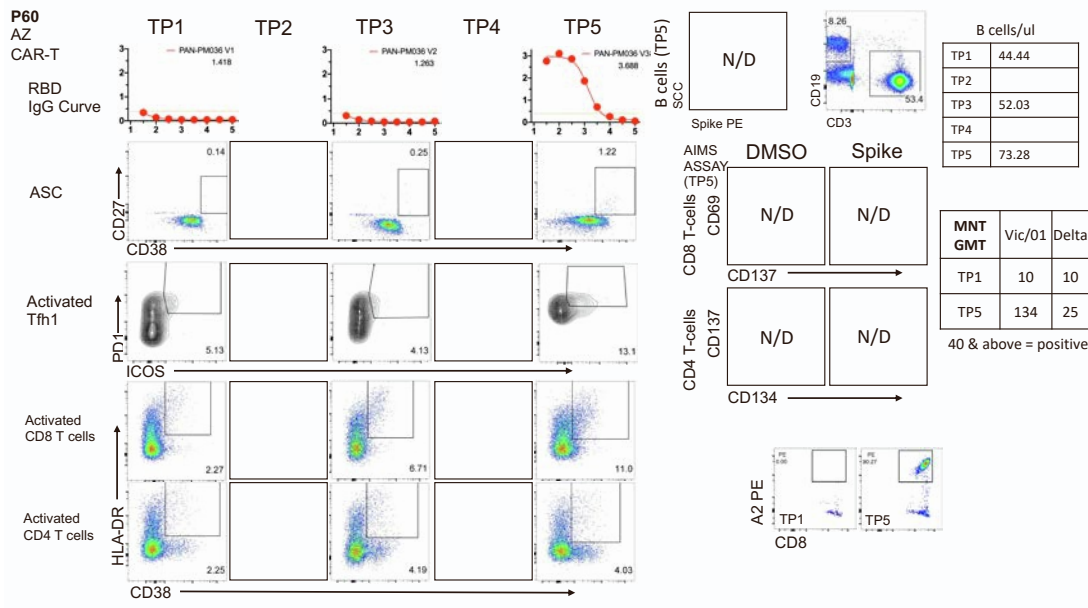

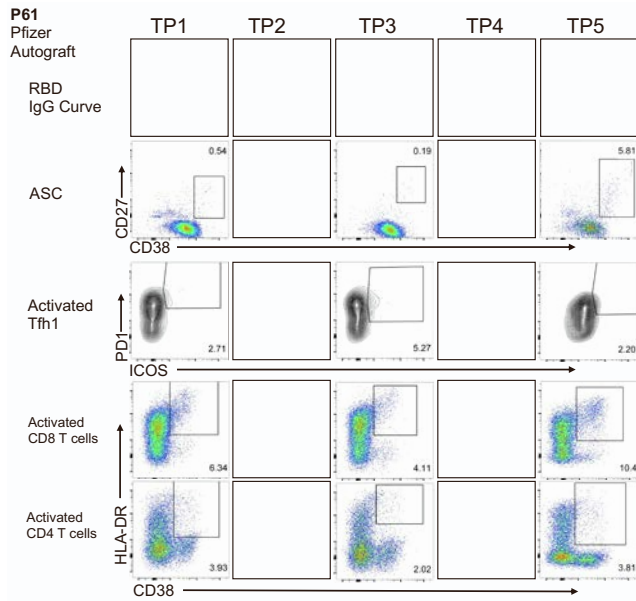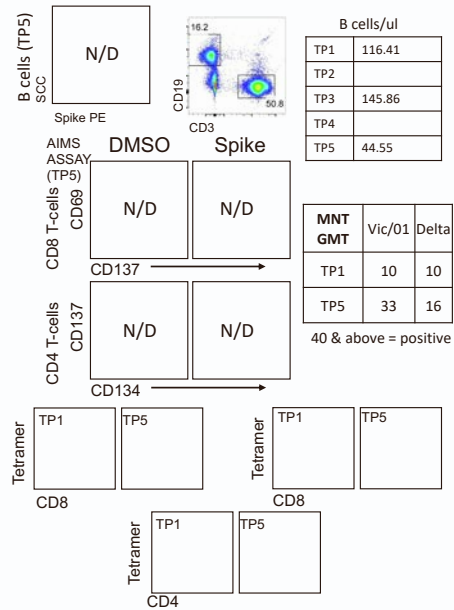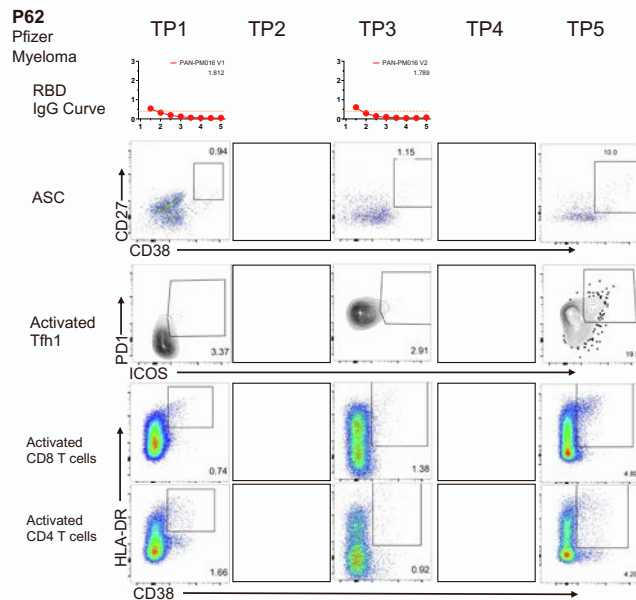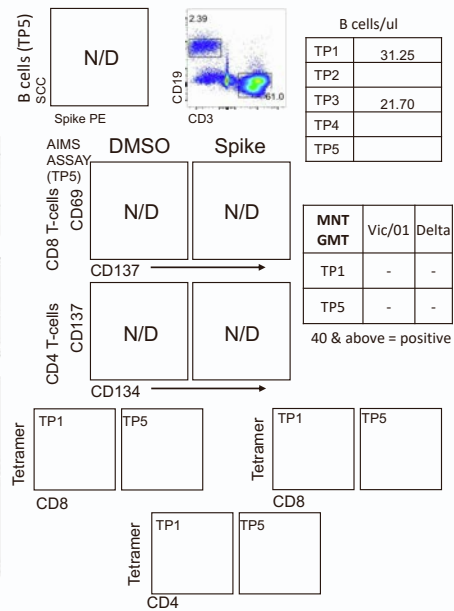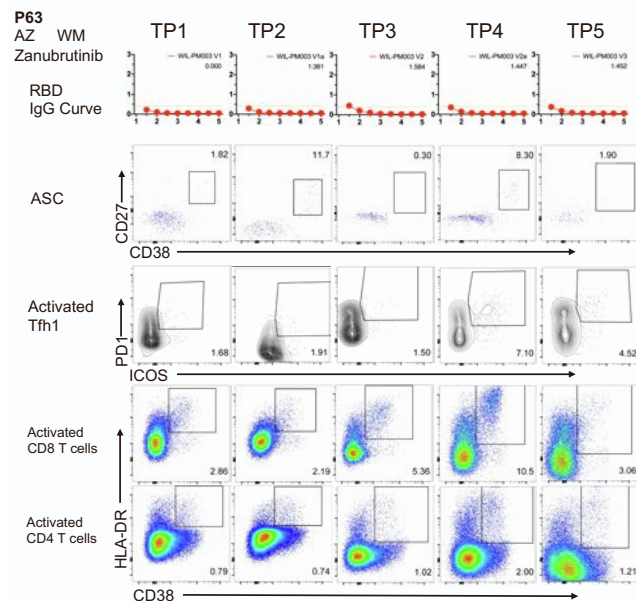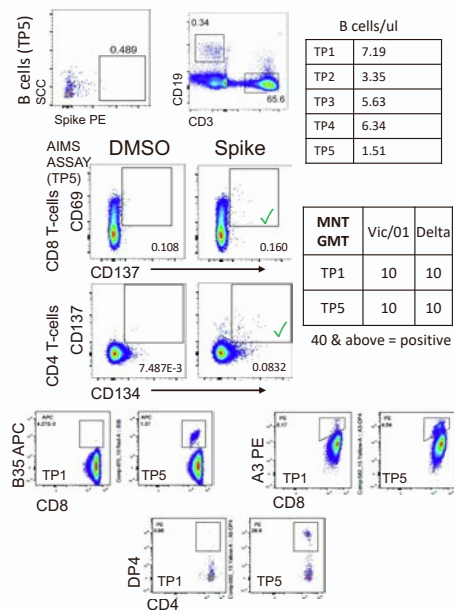

**P64**

Pfizer  
Autograft

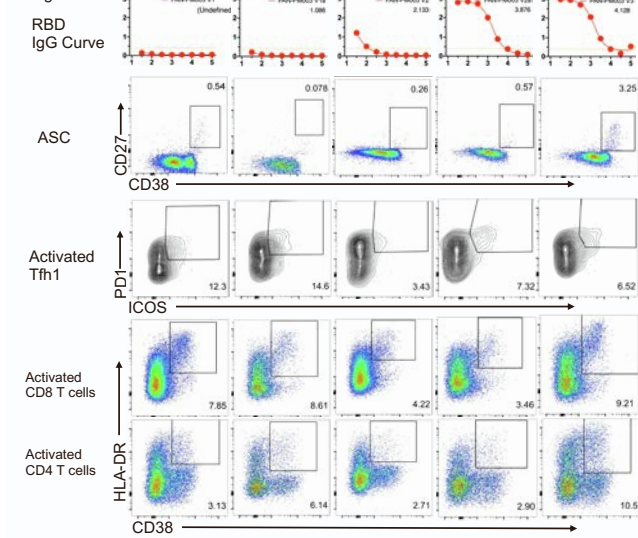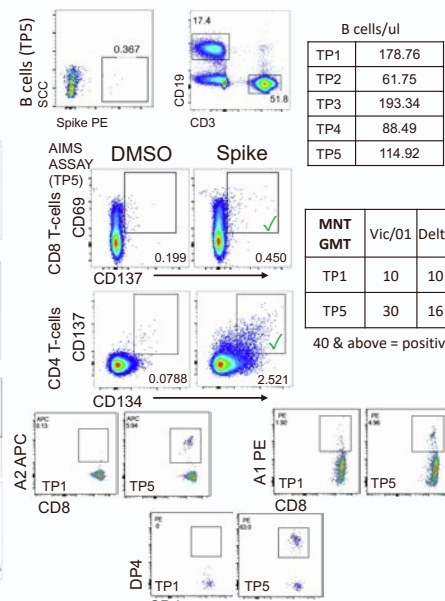

**P65**

AZ CLL  
Zanubrutinib

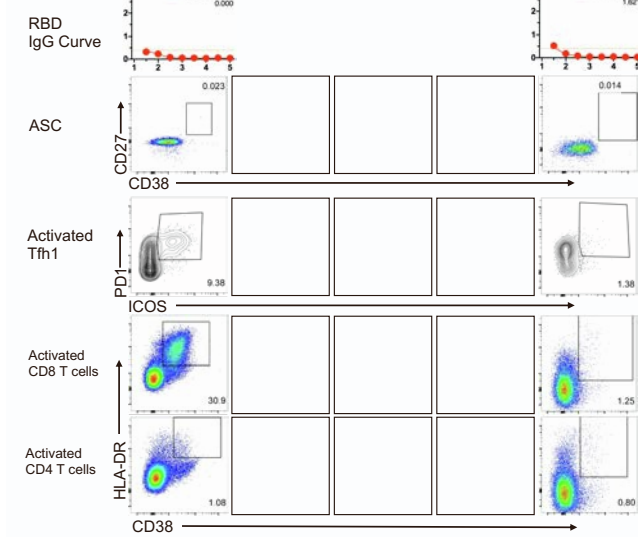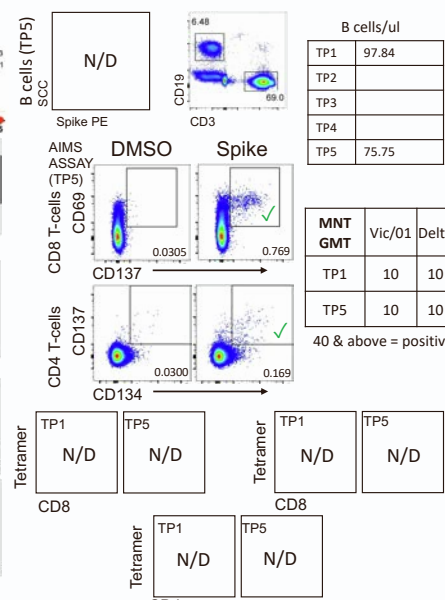

**P66**

AZ CLL  
Zanubrutinib

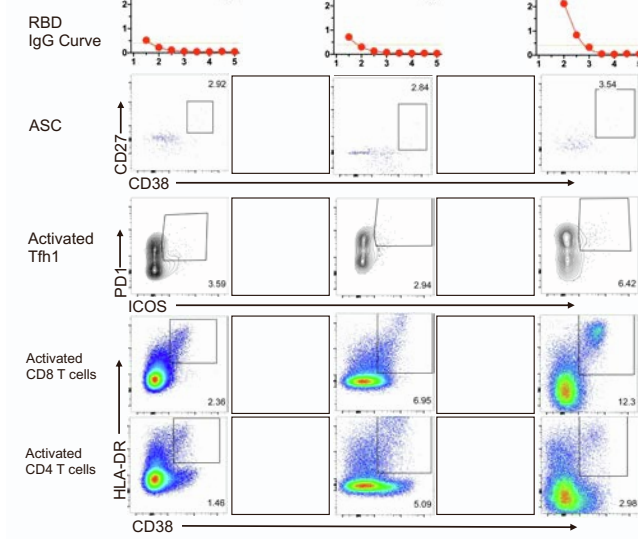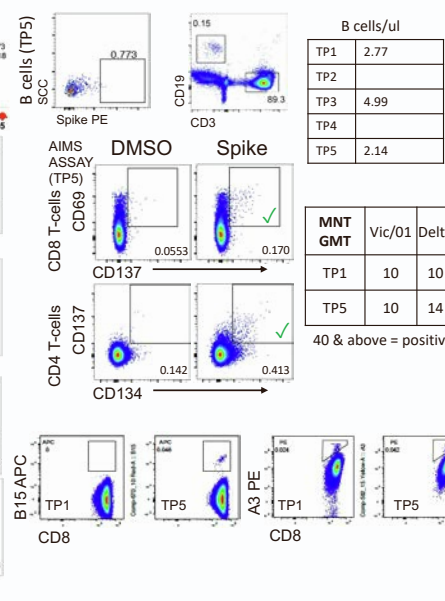



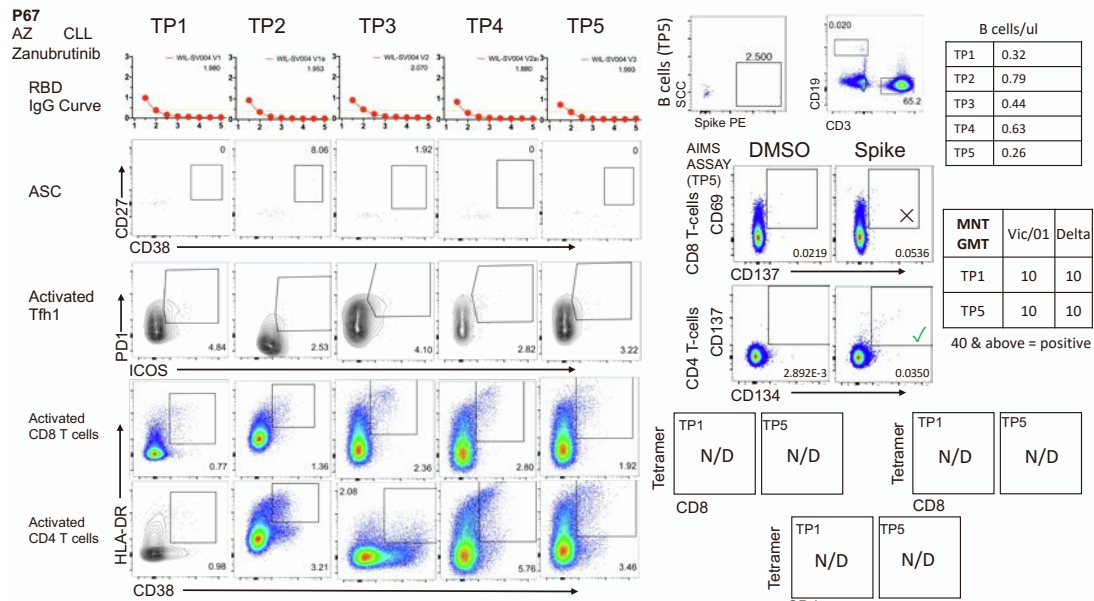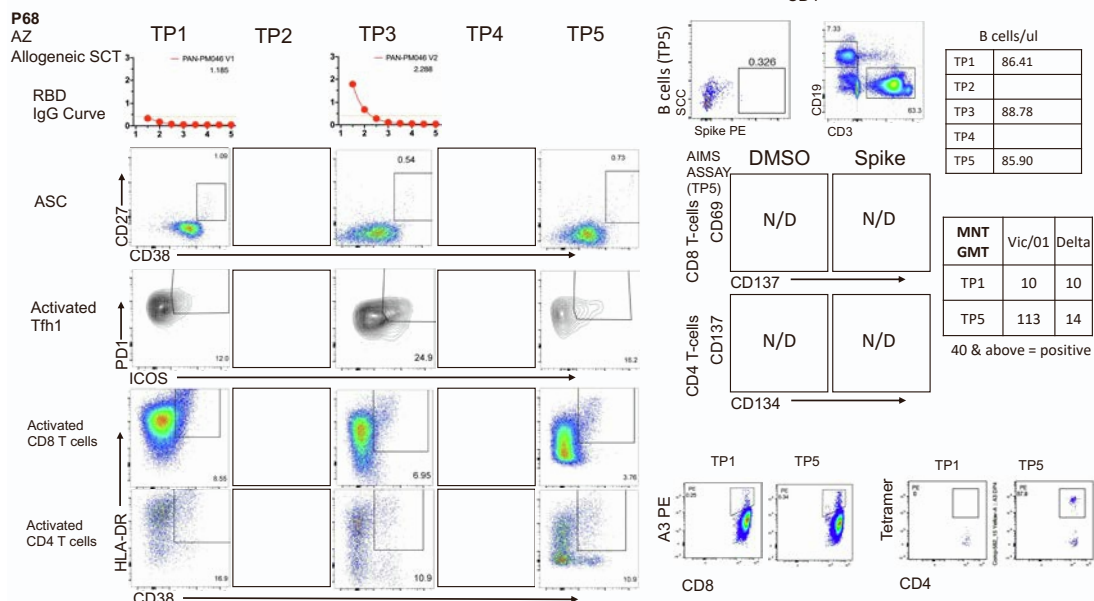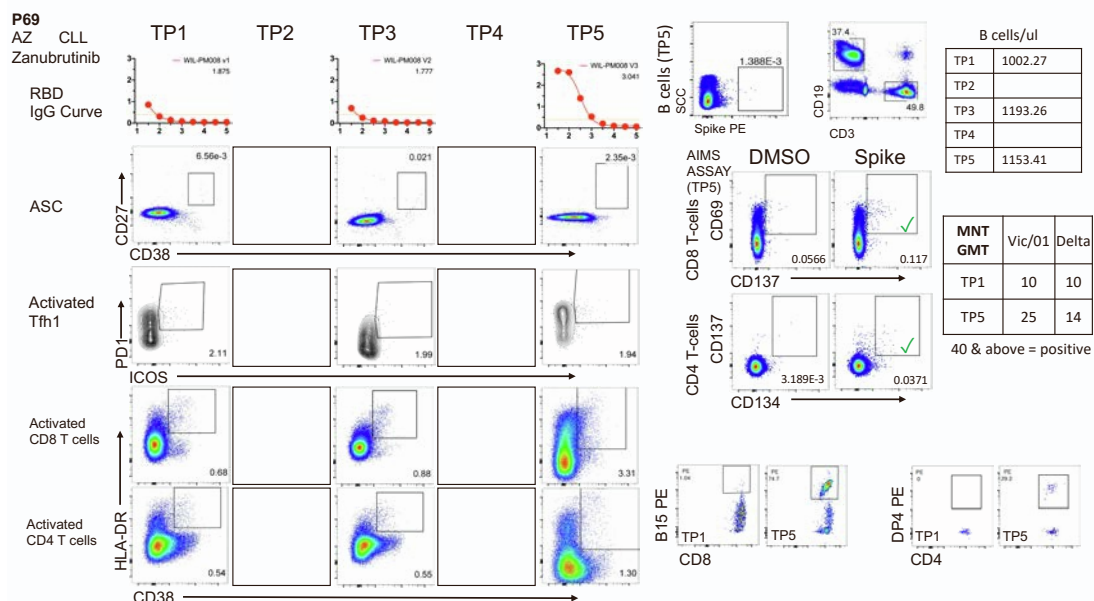

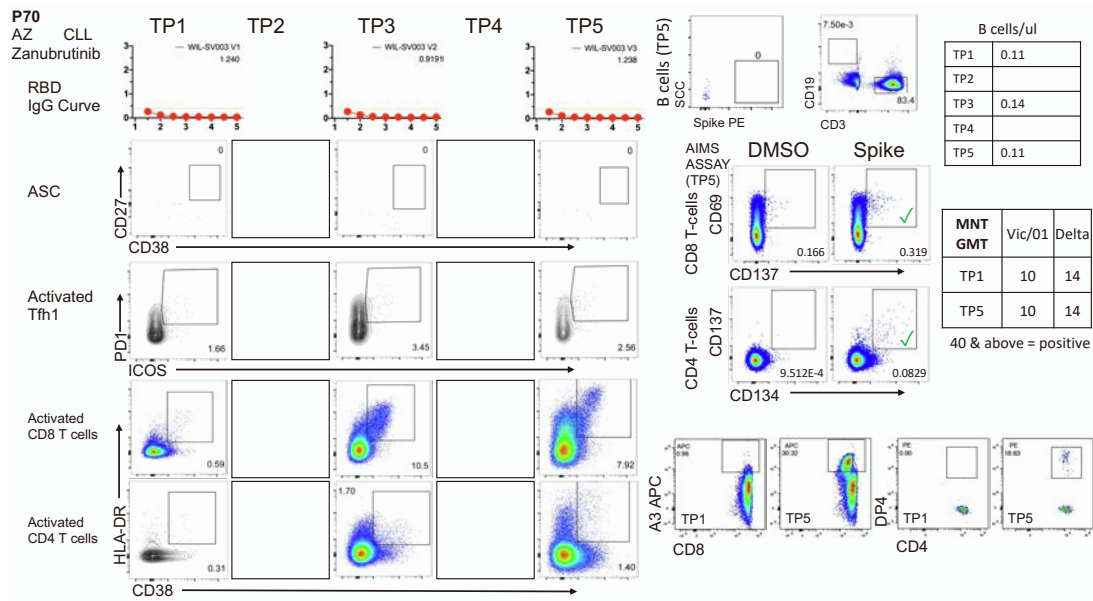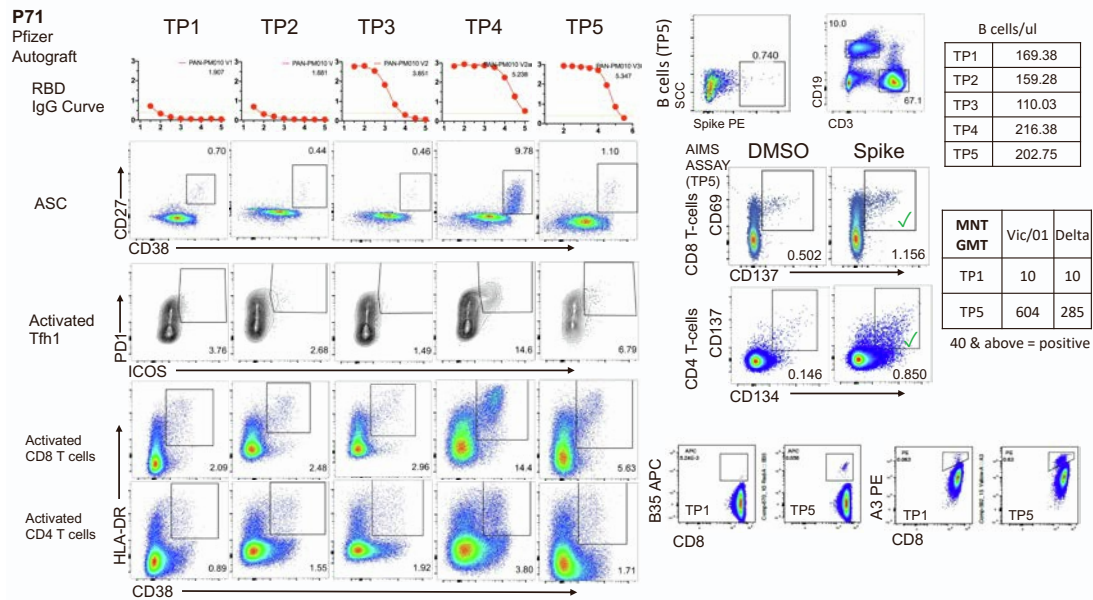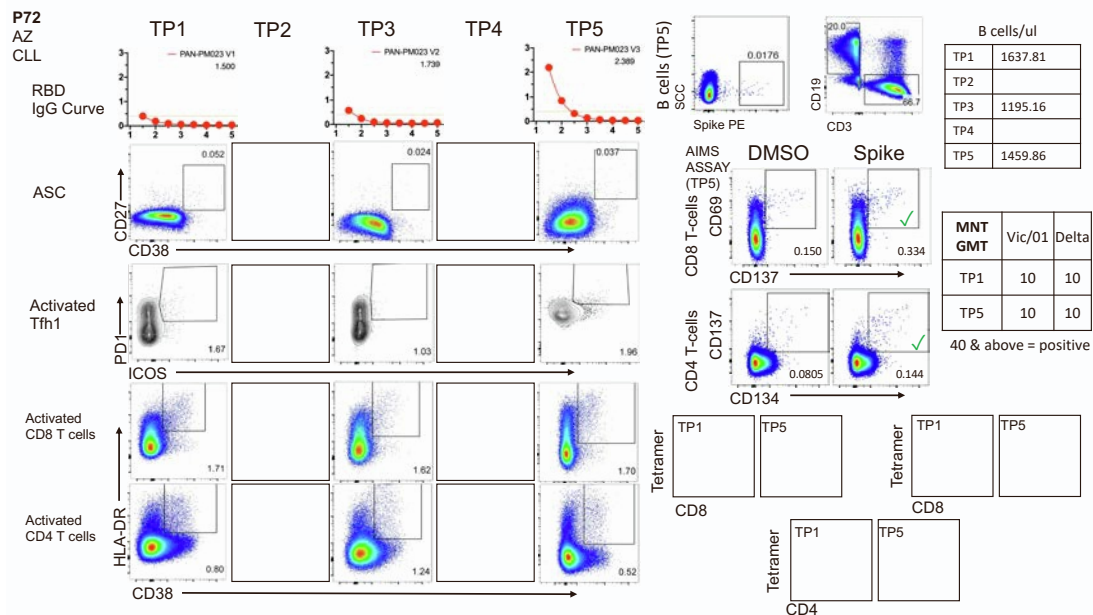

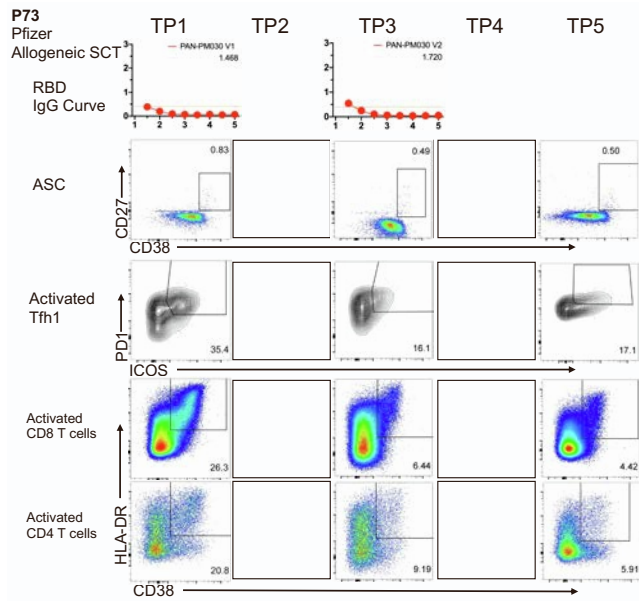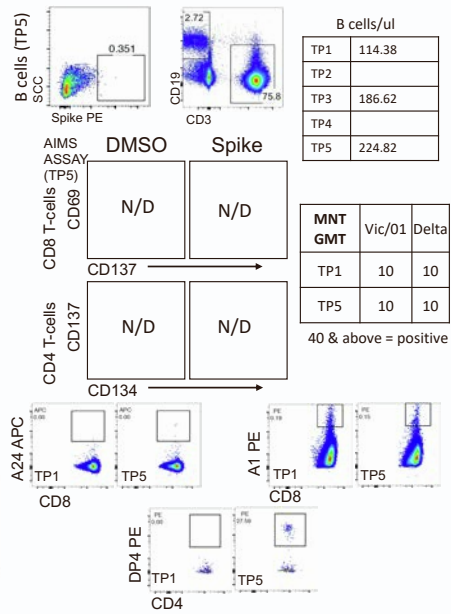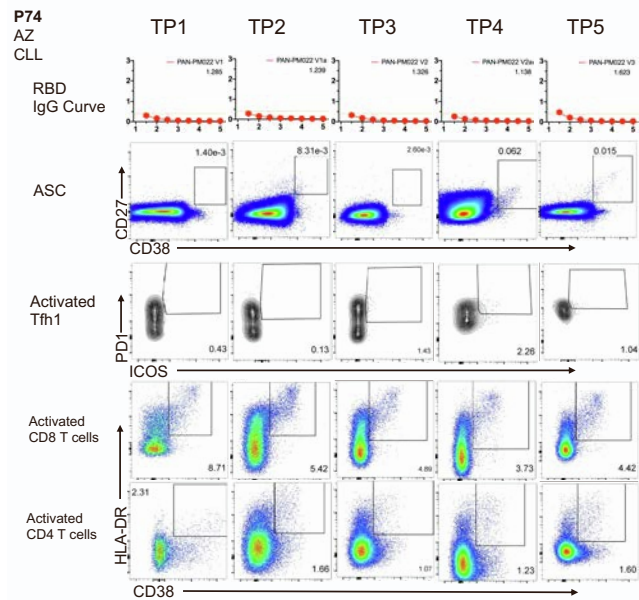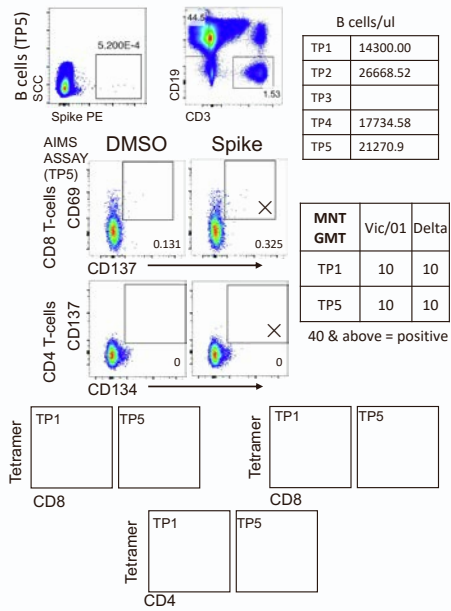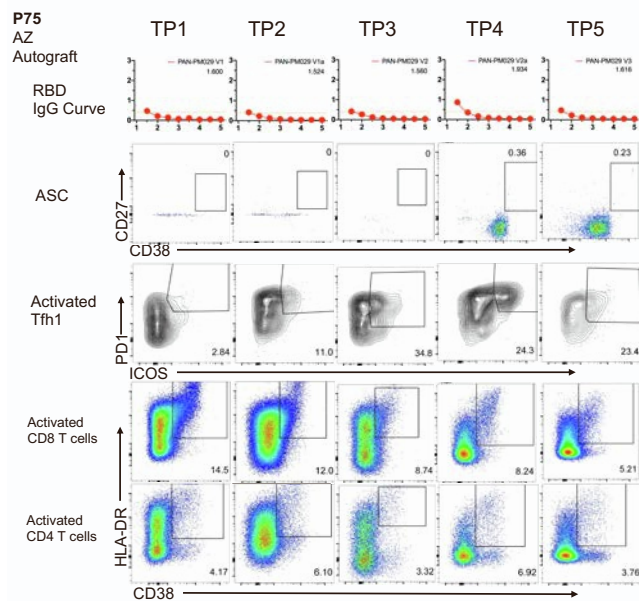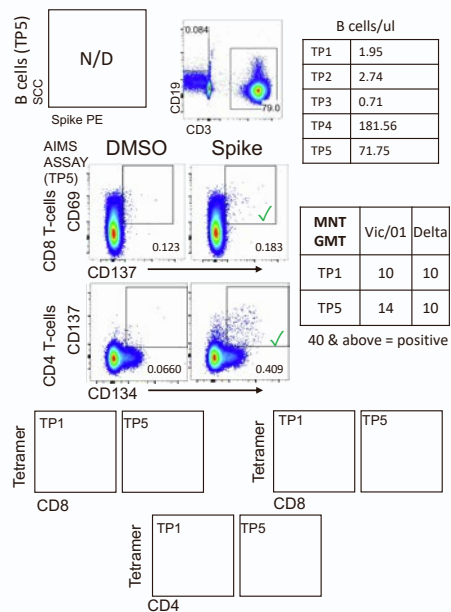



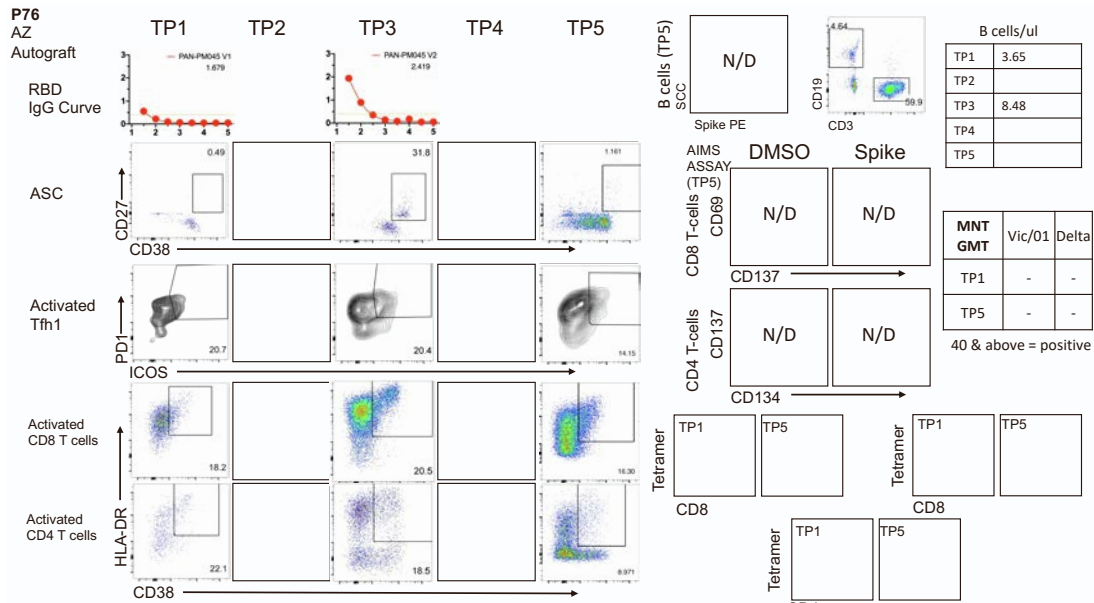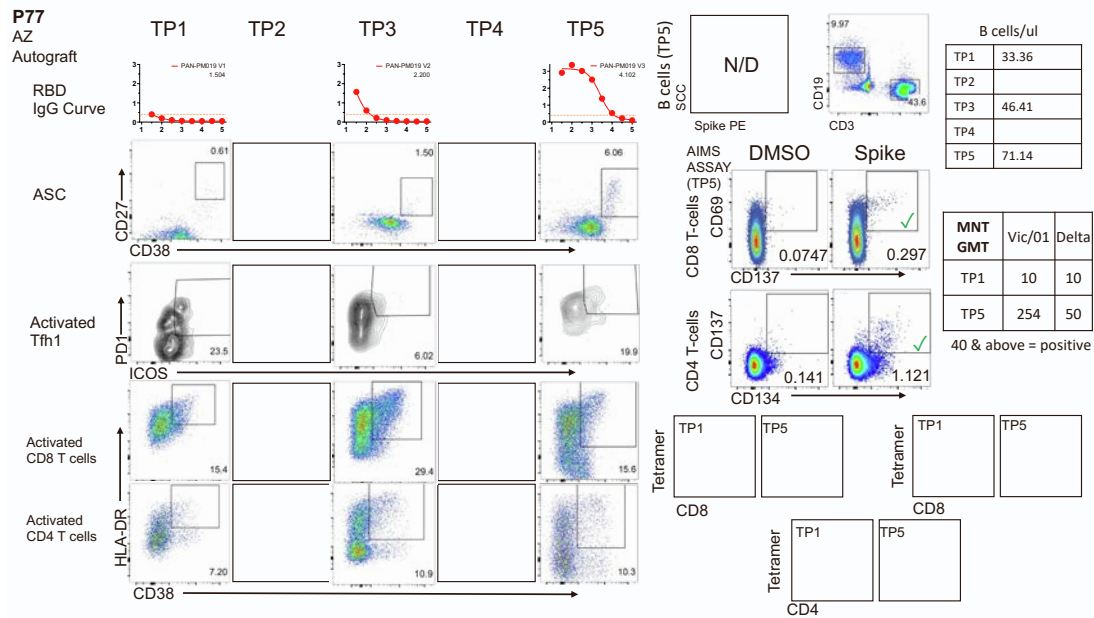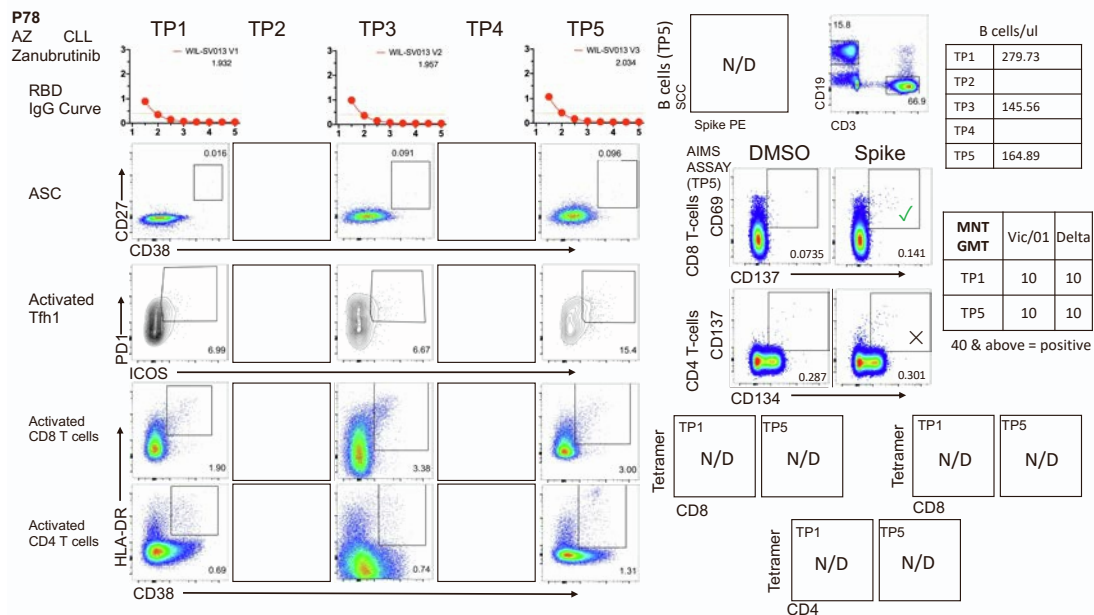

**P79**

AZ CLL  
Venetoclax

RBD  
IgG Curve

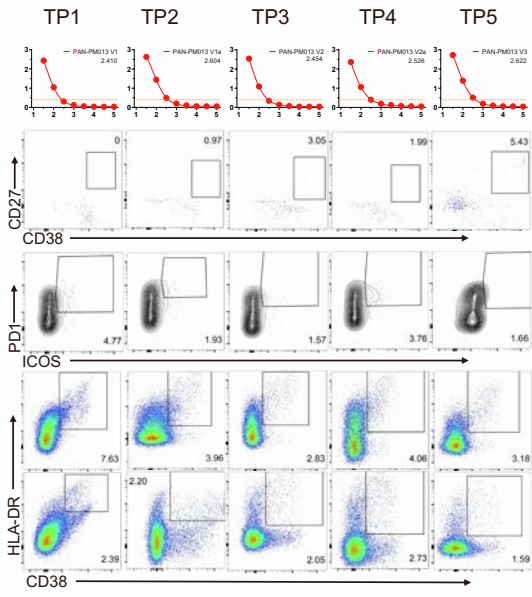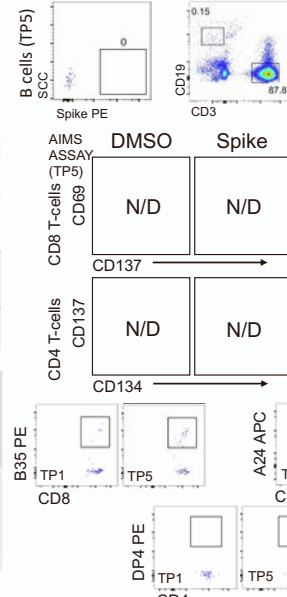

| B cells/ul |      |
|------------|------|
| TP1        | 1.05 |
| TP2        | 0.98 |
| TP3        | 1.81 |
| TP4        | 1.68 |
| TP5        | 4.32 |

| MNT GMT | Vic/01 Delta |    |
|---------|--------------|----|
|         | TP1          | 10 |
| TP5     | 10           | 10 |

40 & above = positive

**P80**

AZ CLL  
Zanubrutinib

RBD  
IgG Curve

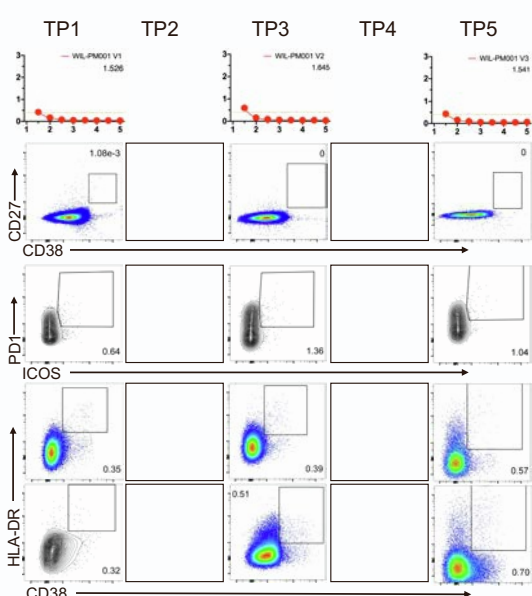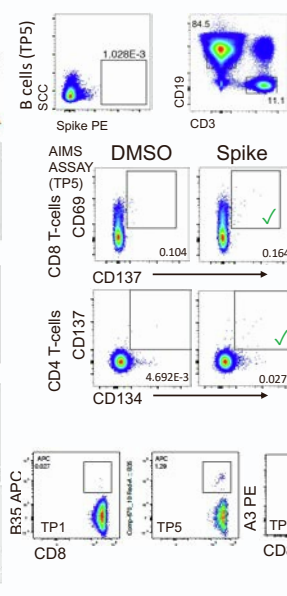

| B cells/ul |          |
|------------|----------|
| TP1        | 13907.62 |
| TP2        |          |
| TP3        | 4838.71  |
| TP4        |          |
| TP5        | 596.82   |

| MNT GMT | Vic/01 Delta |    |
|---------|--------------|----|
|         | TP1          | 10 |
| TP5     | 10           | 10 |

40 & above = positive

**P81**

Pfizer  
CLL

RBD  
IgG Curve

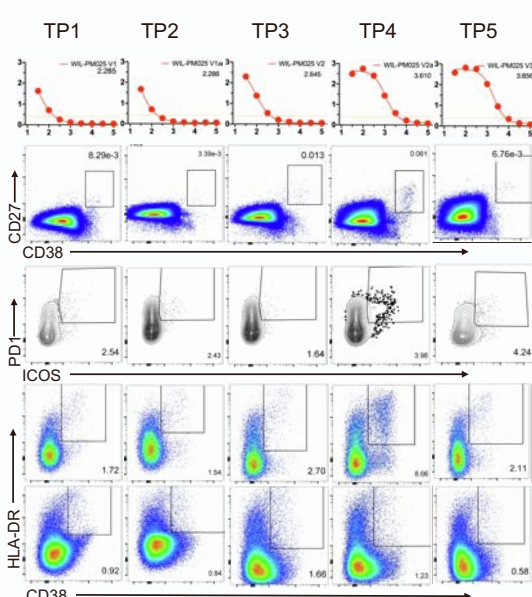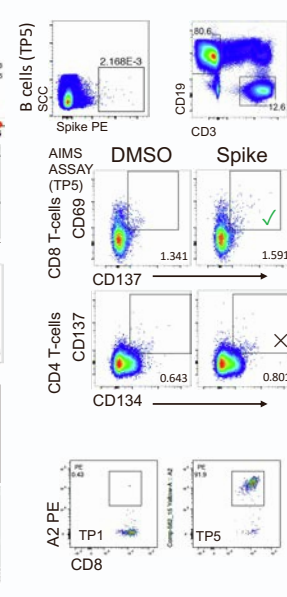

| B cells/ul |          |
|------------|----------|
| TP1        | 13478.11 |
| TP2        | 12834.28 |
| TP3        | 8714.72  |
| TP4        | 9134.31  |
| TP5        | 11136.65 |

| MNT GMT | Vic/01 Delta |    |
|---------|--------------|----|
|         | TP1          | 10 |
| TP5     | 45           | 10 |

40 & above = positive

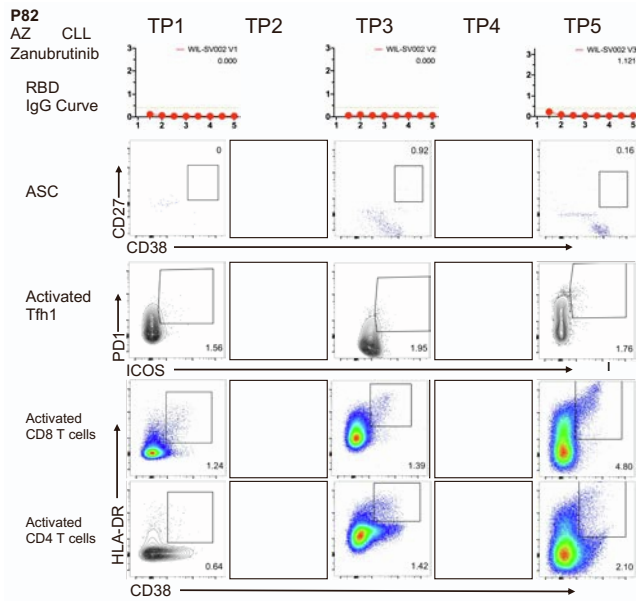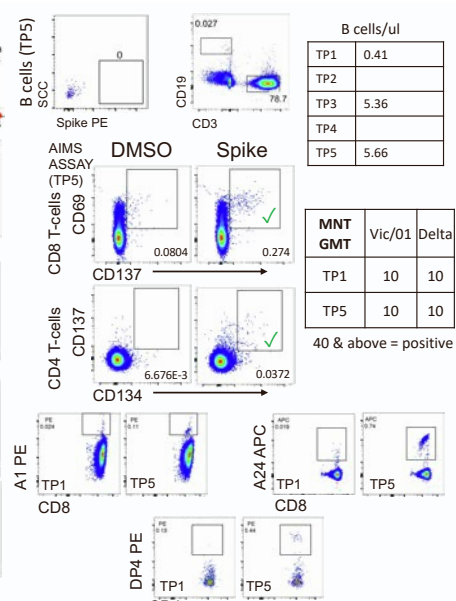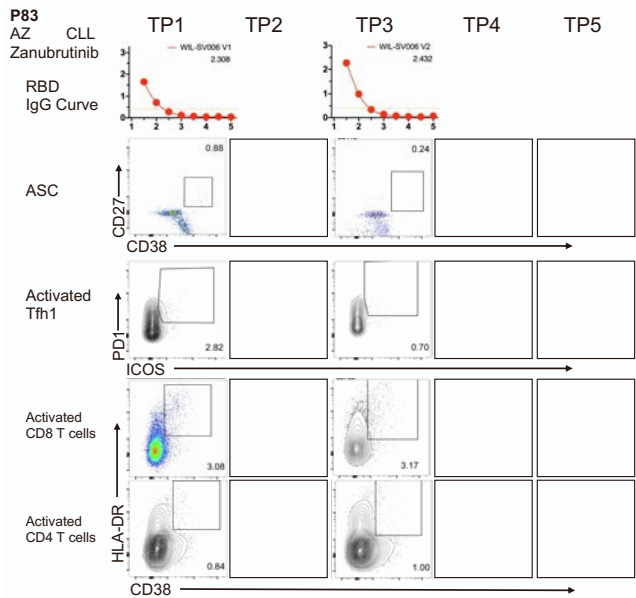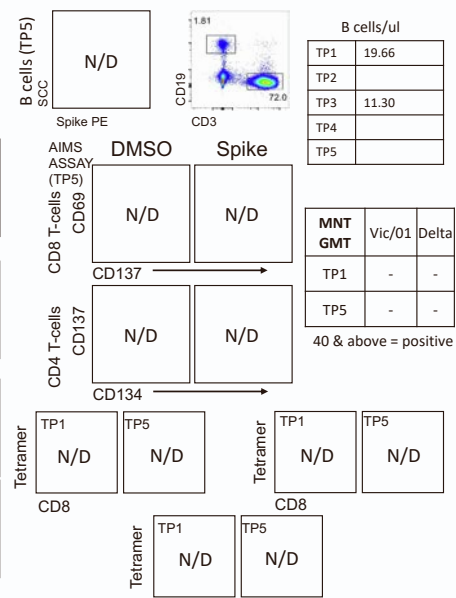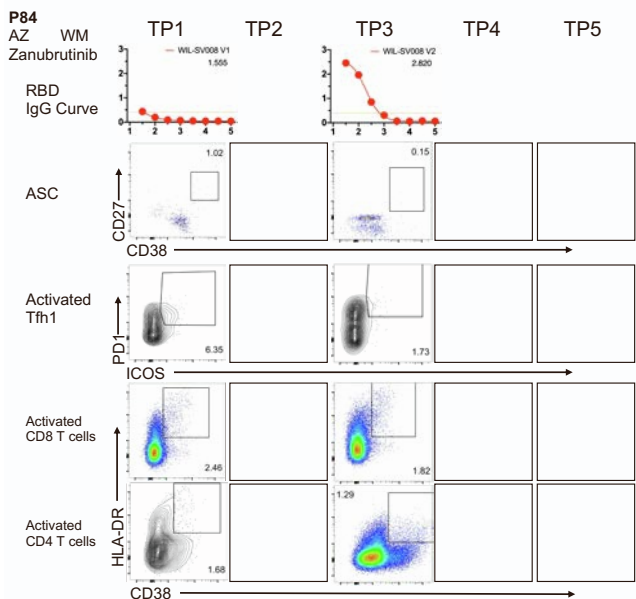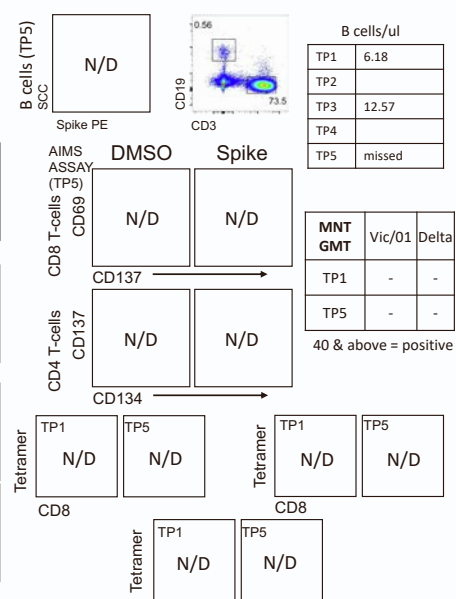

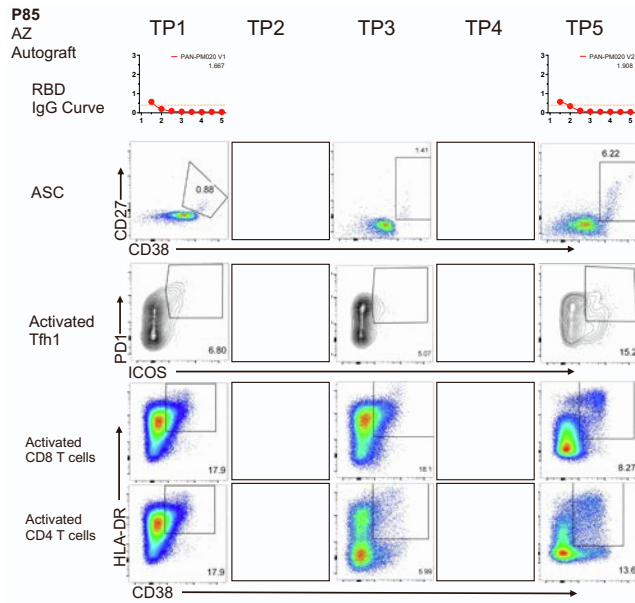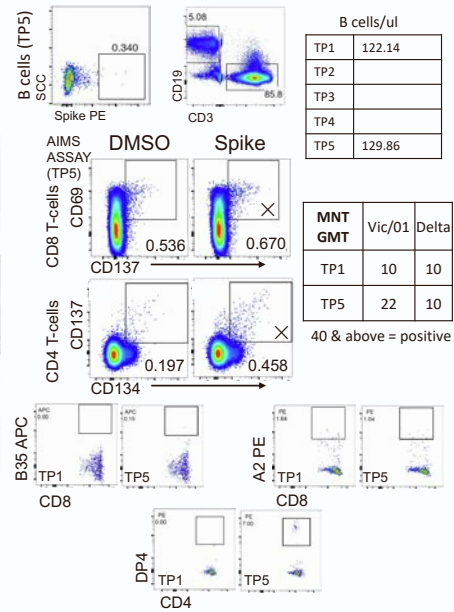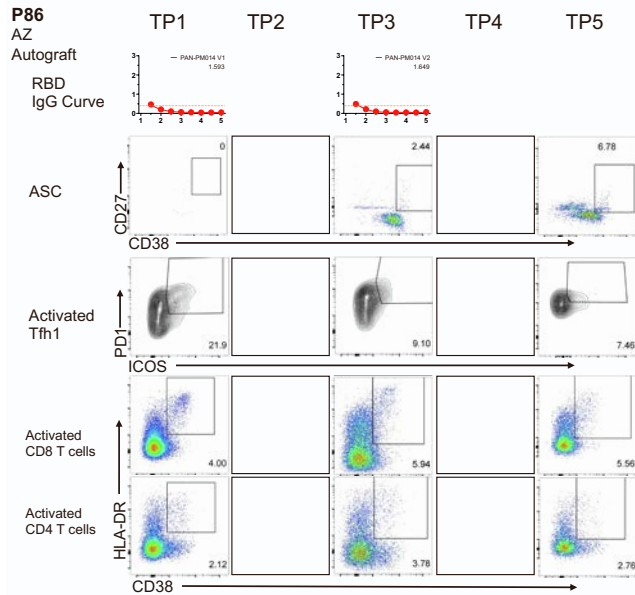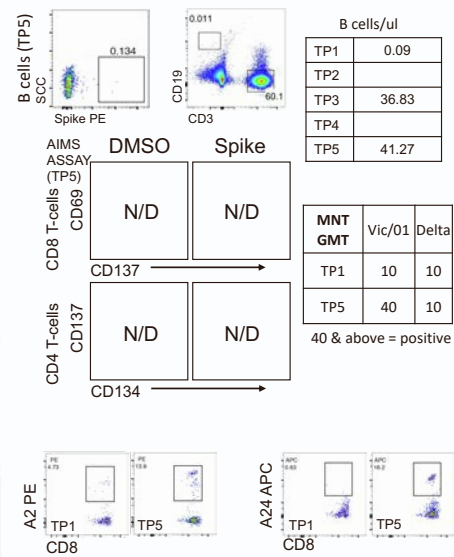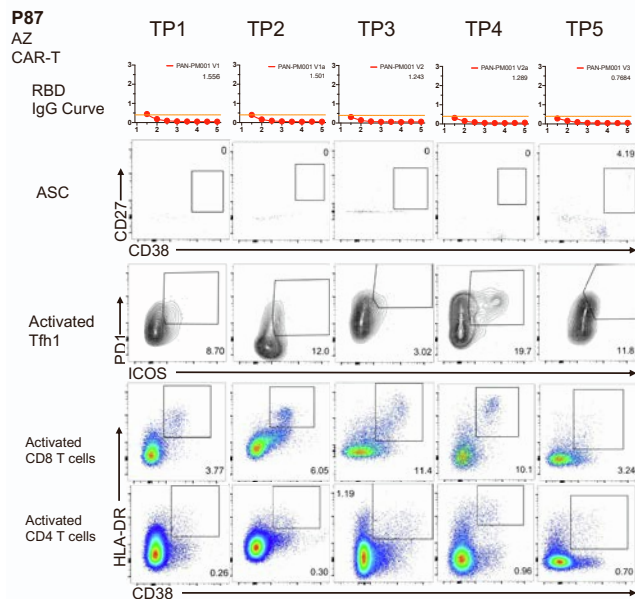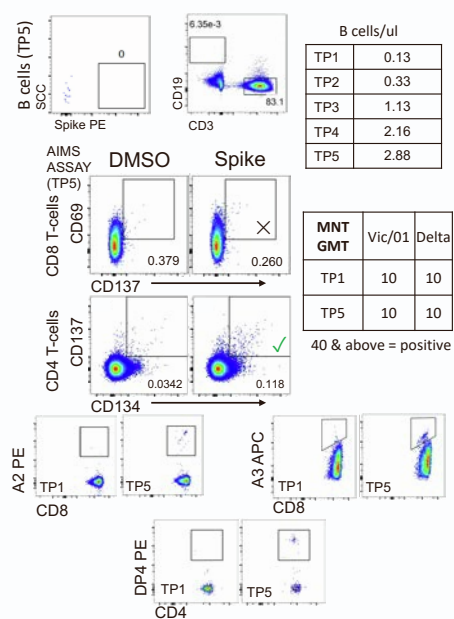



**P88**  
Moderna  
Autograft/  
Myeloma

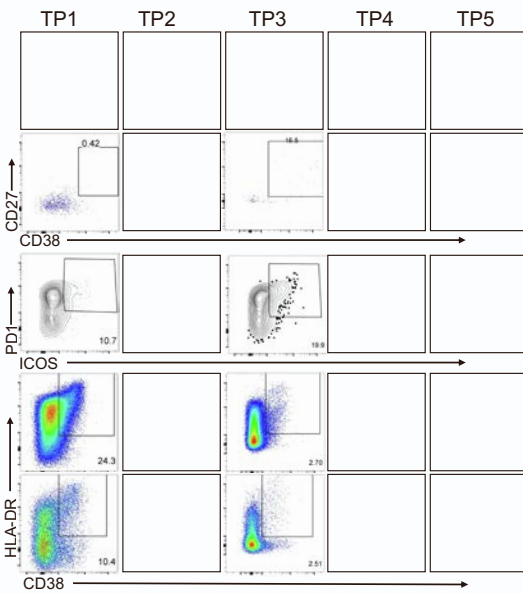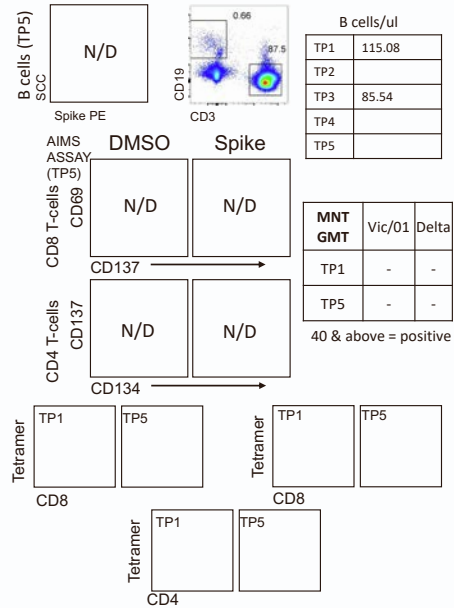

**P89**  
AZ  
CLL

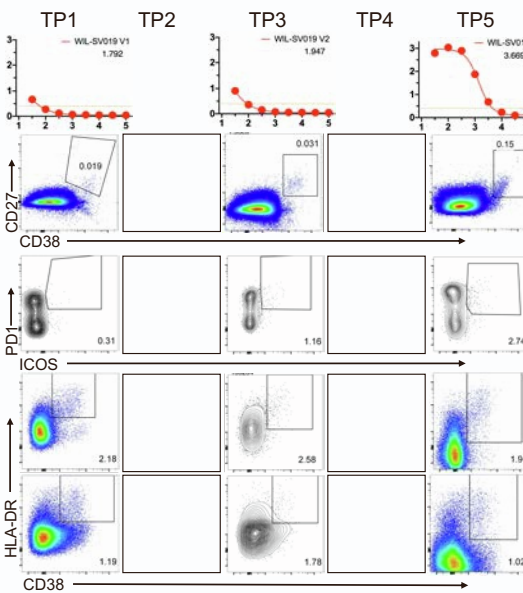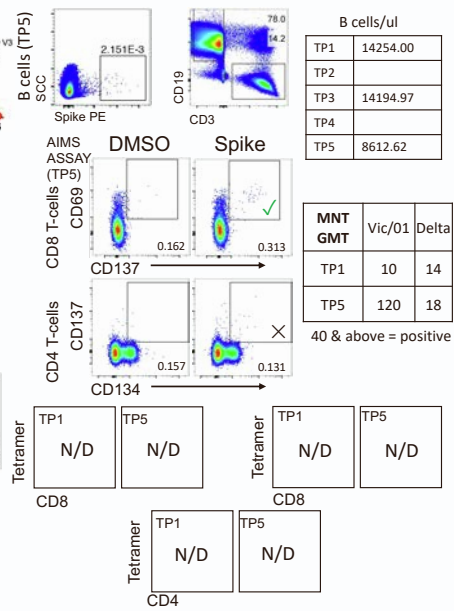

**P90**  
Pfizer  
CAR-T

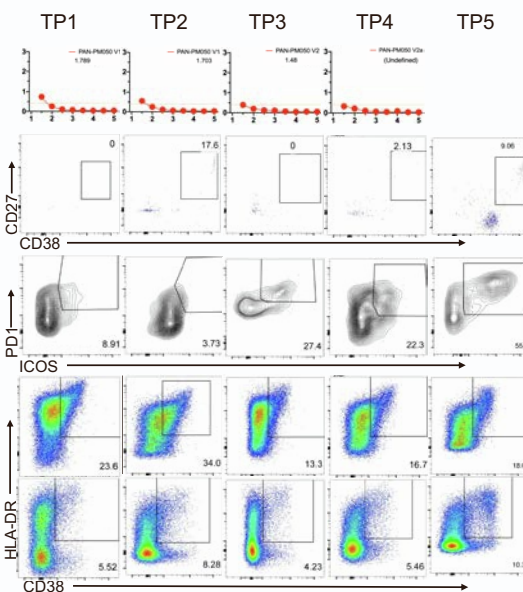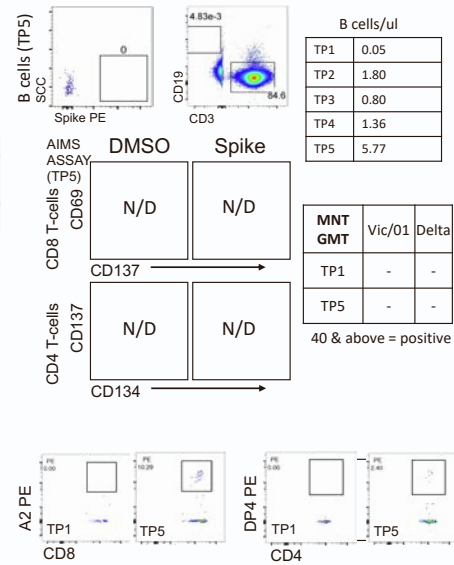

**P91**  
Pfizer  
CAR-T

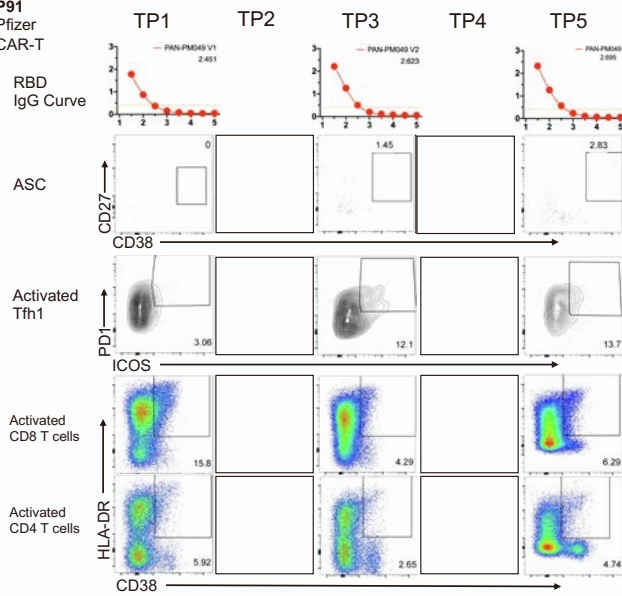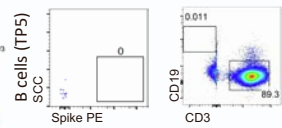

| B cells/ul |      |
|------------|------|
| TP1        | -    |
| TP2        | -    |
| TP3        | 0.65 |
| TP4        | -    |
| TP5        | 0.75 |

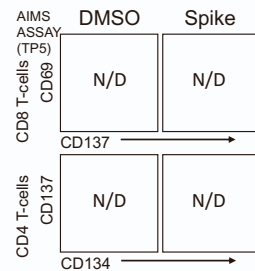

| MNT GMT | Vic/01 Delta |       |
|---------|--------------|-------|
|         | Vic/01       | Delta |
| TP1     | 10           | 14    |
| TP5     | 10           | 10    |

40 & above = positive

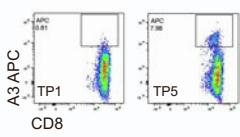

**P92**  
Pfizer  
Myeloma (Post Autograft)

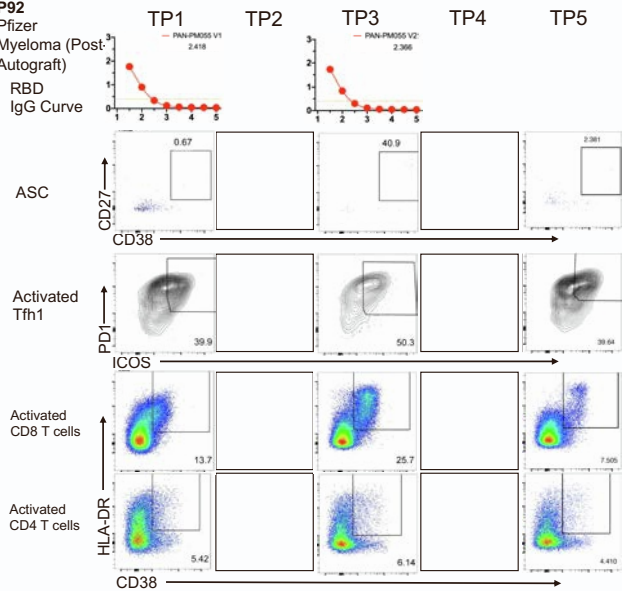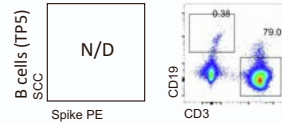

| B cells/ul |      |
|------------|------|
| TP1        | 5.83 |
| TP2        | -    |
| TP3        | 0.24 |
| TP4        | -    |
| TP5        | -    |

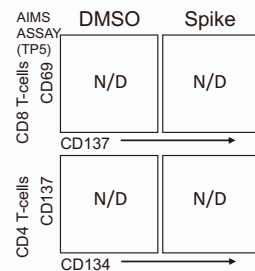

| MNT GMT | Vic/01 Delta |       |
|---------|--------------|-------|
|         | Vic/01       | Delta |
| TP1     | -            | -     |
| TP5     | -            | -     |

40 & above = positive

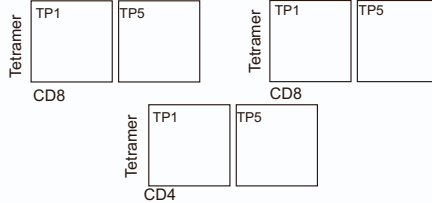

**P93**  
Pfizer CLL  
Venetoclax

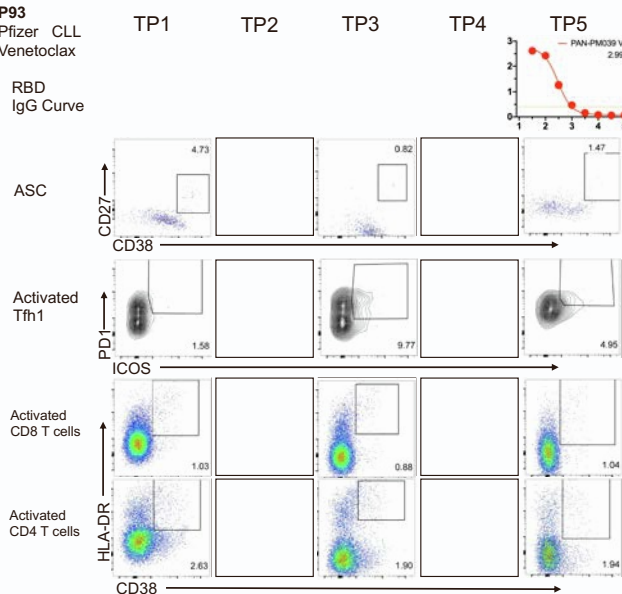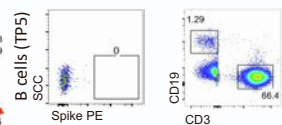

| B cells/ul |      |
|------------|------|
| TP1        | 8.21 |
| TP2        | -    |
| TP3        | 7.92 |
| TP4        | -    |
| TP5        | 8.45 |

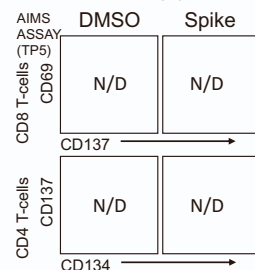

| MNT GMT | Vic/01 Delta |       |
|---------|--------------|-------|
|         | Vic/01       | Delta |
| TP1     | 10           | 10    |
| TP5     | 10           | 10    |

40 & above = positive

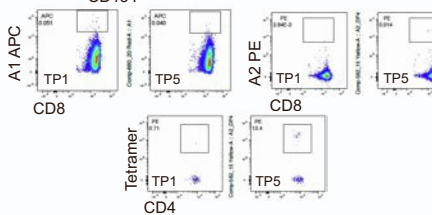

Supplement: mmc1.pdf [file mmc1.pdf]
